27 **Abstract**

28 Pesticides are critical for invasive species management, but often have negative effects on non-  
29 target native biota. Tolerance to pesticides should have an evolutionary basis, but this is poorly  
30 understood. Invasive sea lamprey (*Petromyzon marinus*) populations in North America have  
31 been controlled with a pesticide lethal to them at lower concentrations than native fishes. We  
32 addressed how interspecific variation in gene expression and detoxification gene diversity confer  
33 differential pesticide sensitivity in two fish species. We exposed sea lamprey and bluegill  
34 (*Lepomis macrochirus*), a tolerant native species, to TFM, a pesticide commonly used in sea  
35 lamprey control, and used whole-transcriptome sequencing of gill and liver to characterize the  
36 cellular response. Comparatively, bluegill exhibited a larger number of detoxification genes  
37 expressed and a larger number of responsive transcripts overall, which likely contributes to  
38 greater tolerance to TFM. Understanding the genetic and physiological basis for pesticide  
39 tolerance is crucial for managing invasive species.

40

41 Invasive species represent a considerable threat to local biodiversity and ecosystem  
42 functioning, having significant economic costs associated with lost ecosystem services and  
43 control efforts<sup>1</sup>. Invasive species control is multifaceted and serves primarily to reduce, but not  
44 necessarily eradicate, populations of the target organism<sup>2</sup>. Often, chemical pesticides are used to  
45 kill the target species while attempting to minimize non-target impacts<sup>2</sup>. In aquatic environments,  
46 this can be difficult as pesticides are often applied to large portions of the waterbody, thus  
47 exposing all community members<sup>3</sup>. However, species-specific pesticides are relatively rare and,  
48 consequently, there will likely be impacts on native species in most pesticide application  
49 programs<sup>4</sup>.

50 The degree to which different species are adversely affected by pesticide applications can  
51 be highly species-specific. Interspecific variation in pesticide sensitivities occurs in amphibians<sup>5</sup>,  
52 invertebrates<sup>6</sup>, and fishes<sup>7</sup>, which suggests that species-specific differences in pesticide uptake,  
53 biotransformation, and elimination (i.e., the disposition) are likely driving differential  
54 sensitivity<sup>8</sup>. Further, phylogenetic signatures associated with toxicity tolerances have been  
55 identified in several clades of aquatic ectotherms<sup>9</sup>. This suggests that toxicity tolerances likely  
56 have an evolutionary basis and are in part genetically determined<sup>10</sup>. Recent transcriptional  
57 profiling of several teleost fishes has shown considerable interspecific variation amongst genes  
58 involved in detoxification of pesticides and other xenobiotics<sup>11</sup>, underscoring an important  
59 genomic role in toxicity tolerances. Consequently, using molecular toolsets for understanding  
60 pesticide responses are valuable in providing insight into phylogenetic variation in physiological  
61 response and in predicting community impacts of pesticide applications<sup>9,10</sup>. This is relevant in  
62 contemporary invasion control efforts, where minimizing harm to native species is often a key  
63 objective<sup>12</sup>. To date, our understanding of the genetic and evolutionary underpinnings of  
64 interspecific variation in toxicity tolerance is limited, hindering our insight into community-level  
65 effects of pesticide applications.

66 The sea lamprey (*Petromyzon marinus*) control program in the Laurentian Great Lakes of  
67 North America (hereafter referred to as the Great Lakes) is an excellent model system to explore  
68 the evolutionary and genetic foundations of differential toxicity tolerance to a pesticide in target  
69 (i.e., invasive sea lamprey) and non-target (native) species. Sea lamprey, although native to the  
70 Atlantic Ocean, likely gained access to Lake Ontario through canals in the mid-1800s; the

71 Welland Canal subsequently allowed access to the remaining Great Lakes by the early 1900s<sup>13</sup>.  
72 By the 1950s, sea lamprey populations in the Great Lakes had exploded, decimating native  
73 fisheries, notably lake trout (*Salvelinus namaycush*), having severe impacts on the environment  
74 and economy of the region<sup>13</sup>. An international Great Lakes Fishery Commission (GLFC)  
75 involving Canadian and American institutions was formed in 1955 to co-manage fisheries and to  
76 control sea lamprey populations. Since the 1950s, the GLFC's primary method of sea lamprey  
77 control has involved treating streams and rivers with pesticides, commonly referred to as  
78 lampricides, that target burrowing sea lamprey larvae in Great Lakes tributaries<sup>13</sup>. Because the  
79 filter-feeding larval stage lasts for ~4–5 years before sea lamprey metamorphose into parasitic  
80 juveniles that disperse widely in the lakes, lampricide treatments in streams containing sea  
81 lamprey larvae kill multiple year classes at once.

82 Two pesticides are used to control sea lamprey, 3-trifluoromethyl-4-nitrophenol (TFM)  
83 and niclosamide (2',5-dichloro-4'-nitrosalicylanilide), each of which contains a halogenated  
84 phenol ring that contributes to their toxicity<sup>3</sup>. In most treatments, TFM is applied at  
85 concentrations reaching the sea lamprey 9-h LC<sub>99.9</sub> of TFM<sup>14</sup>, the concentration needed to kill  
86 99.9% of the exposed population, and is co-applied with 1-2% niclosamide because these  
87 compounds interact in a greater than additive fashion<sup>15</sup>. While niclosamide is broadly toxic to  
88 fishes<sup>3</sup>, TFM is highly toxic to lampreys relative to jawed fishes. The mode of action of TFM is  
89 interference with oxidative phosphorylation in the mitochondria<sup>16</sup>, which lowers aerobic ATP  
90 production forcing the animal to increasingly rely on unsustainable anaerobic glycolysis<sup>17–19</sup>.  
91 However, TFM sensitivity varies greatly among jawed fishes, which makes understanding the  
92 broader non-target impacts of TFM difficult to resolve<sup>3</sup>. For example, lake sturgeon (*Acipenser*  
93 *fulvescens*), a non-teleost jawed fish, are moderately sensitive to TFM<sup>3</sup>, while centrarchids,  
94 which includes basses and bluegill (*Lepomis macrochirus*), have some of the highest reported  
95 tolerances to TFM amongst teleost fishes in the Great Lakes, with reported LC values ~10-fold  
96 higher than sea lamprey<sup>19</sup>.

97 Little is understood about the physiological mechanisms driving varying tolerances to  
98 TFM among fishes<sup>3</sup>. Detoxification of TFM is believed to occur through a combination of Phase  
99 I and Phase II biotransformation processes, which collectively act to enhance the water solubility  
100 of the compound to improve elimination<sup>3</sup>. It is generally believed that UDP-

101 glucuronosyltransferase (Ugt) is the main enzyme responsible for TFM detoxification, via  
102 conjugation of TFM through the addition of a UDP-glucuronic acid<sup>20-22</sup>. The greater sensitivity  
103 of lampreys to TFM is believed to be related to lower Ugt activities compared to other fishes<sup>20-</sup>  
104 <sup>22</sup>, but the other cellular aspects of TFM detoxification are poorly characterized in fishes.  
105 Furthermore, interspecific variation in detoxification gene diversity is believed to be important in  
106 driving differences in toxicity tolerances among fishes<sup>11</sup>, which could suggest that available *ugt*  
107 genes impart differential TFM tolerances between sea lamprey and non-target fishes. Indeed,  
108 compared to zebrafish (*Danio rerio*; N =40), sea lamprey have far fewer *ugt* genes (N= 2) in  
109 their genome<sup>23</sup>. A few comparative studies have been conducted looking at sea lamprey and  
110 rainbow trout (*Oncorhynchus mykiss*), however little attention has been paid to the physiological  
111 effects of TFM exposure in other fishes<sup>16-19</sup>. As TFM detoxification primarily occurs in the  
112 liver, and the gills are one of the primary uptake sites, TFM physiological studies often focus on  
113 these two tissue types in fishes<sup>3</sup>. However, a broader characterization of TFM toxicity,  
114 particularly the expression patterns of Phase I and Phase II enzyme genes, in fishes is necessary.

115 We used a comparative transcriptomics approach to evaluate the effects of TFM on sea  
116 lamprey and bluegill, species with the lowest and highest reported tolerances to TFM,  
117 respectively<sup>19</sup>. The purpose of this study was to: 1) characterize interspecific variation in  
118 detoxification gene families expressed in the transcriptome following TFM exposure, 2) assess  
119 the potential mechanisms of TFM detoxification common to both species, and 3) identify key  
120 taxon-specific differences in the physiological response to TFM between sea lamprey and a  
121 TFM-tolerant teleost fish. We predicted that bluegill would have a greater diversity of  
122 detoxification mechanisms alongside a large robust transcriptomic detoxification response that  
123 contributes to their greater tolerance to TFM relative to sea lamprey. We also predicted that the  
124 molecular signatures of TFM toxicity would become more evident with increasing exposure  
125 duration as detoxification systems become exhausted; effects that would be more pronounced in  
126 the sea lamprey. These results will help to identify the evolutionary and genetic underpinnings of  
127 pesticide tolerance, which may be used to inform improvements in invasive species control  
128 efforts across a diversity of contexts.

## 129 **Results**

### 130 *Detoxification gene expression patterns*

131 Sea lamprey and bluegill were exposed to TFM for 6, 12, and 24 h at their species-  
132 specific 24 h-LC<sub>10</sub> (sea lamprey = 2.21 mg L<sup>-1</sup>, bluegill = 22.06 mg L<sup>-1</sup>) with gill and liver tissue  
133 being sampled at 6, 12, and 24 h of exposure<sup>19</sup>. The mRNA from the gills and liver were  
134 extracted and sequenced using a whole transcriptome approach for the identification of gene  
135 targets associated with TFM detoxification and gene ontology (GO) term enrichment. As  
136 variation in TFM tolerance is believed to stem from differences in biotransformation capacities  
137 in fishes<sup>3,21</sup>, we filtered for Phase I-III biotransformation transcripts from each species'  
138 transcriptome. Proteins listed as being involved with detoxification, xenobiotic removal, and/or  
139 organic compound breakdown were retained as these functions likely made them important in  
140 TFM detoxification. Briefly, Phase I biotransformation generally includes the hydrolysis of  
141 organic compounds while Phase II biotransformation involves conjugation of organics with both  
142 processes enhancing xenobiotic solubility for easier elimination. Phase III biotransformation  
143 typically involves facilitating the excretion of the xenobiotic<sup>24</sup>.

144 Several Phase I detoxification transcripts were affected by TFM treatment in both  
145 species. In sea lamprey, transcripts associated with Phase I detoxification processes were only  
146 differentially expressed in the gills and consisted mainly of cytochrome P450s (six unique *cyp*'s;  
147 Table 1). Notably, this included both *cyp1a1* (6 h) and *cyp1b1* (24 h) with a paraoxonase (*pon1*)  
148 being the only non-*cyp* transcript differentially expressed (Table 1). Most *cyp* transcripts were  
149 upregulated in response to TFM exposure at 6 or 24 h, but *pon1*, *cyp2j2*, and *cyp2d3* were  
150 downregulated at 24 h. Contrastingly, bluegill demonstrated a larger induction of Phase I  
151 detoxification transcripts (nine unique transcripts, 28 differentially expressed transcripts) in both  
152 tissues across all exposure durations (Table 1). In bluegill gill, *cyp1a1* and *cyp1b1* were  
153 upregulated across all timepoints (Table 1). In the bluegill liver, several *cyp* transcripts  
154 responded positively to TFM treatment across exposure durations (e.g., *cyp1a1*, *cyp1b1*,  
155 *cyp2c31*), but three transcripts (*cyp2b2*, *cyp2k1*, *cyp2k6*) were downregulated at 24 h (Table 1).

156 In the transcriptomes of both species, we identified several *ugt*'s likely involved in the  
157 detoxification of TFM (Table 2). In sea lamprey, six clusters from the superTranscriptome  
158 mapped to *ugt*'s. In contrast, the bluegill transcriptome had 17 clusters which mapped to *ugt*'s  
159 (Table 2). There were also noticeable differences between sea lamprey and bluegill in expression  
160 of the *ugt* transcripts in response to TFM exposure. Treatment with TFM did not result in any *ugt*

161 being differentially expressed in sea lamprey. Conversely, in bluegill, *ugt3* was upregulated in  
162 the gill across all three exposure durations (Table 3) and in the liver at 12 and 24 h of exposure.  
163 Interestingly, *ugt3* was not present in the lamprey transcriptome (Table 2). Hepatic *ugt2b9*  
164 transcript levels were also elevated under TFM exposure at 12 and 24 h in bluegill liver, and  
165 TFM exposure led to several *ugt* transcripts (i.e., *ugt1a2*, *ugt1a5*, *ugt2a1*) being downregulated  
166 in the liver of bluegill at 12 and 24 h of TFM exposure (Table 3).

167 There was also a noticeable difference between bluegill and sea lamprey in the  
168 expression patterns for other transcripts involved in Phase II detoxification (Table 4). In sea  
169 lamprey, there were only three differentially expressed transcripts for Phase II genes, including  
170 glutathione S-transferase (*gstt3*), sulfotransferase (*sult6b1*), and nicotinamide N-  
171 methyltransferase (*nmmt*), in both liver and gill, all at 24 h of exposure (Table 4). In bluegill,  
172 several sulfotransferases and a single N-acetyltransferase (*nat8*; Table 4) transcripts were  
173 upregulated in the gill. In the bluegill liver, Phase II detoxification transcripts were only  
174 differentially regulated at 24 h of TFM exposure with N-acetyltransferases (*nat2* and *nat8*) being  
175 the only upregulated transcripts and two glutathione S-transferases (*gstt3* and *gstt1*), a thiopurine  
176 S-methyltransferase (*tpmt*), and a sulfotransferase (*sult1c1*) being downregulated (Table 4).

177 Differential expression of Phase III detoxification transcripts was limited to 24 h of  
178 exposure in sea lamprey. In the gills, five ATP-binding cassettes (*abc*; *abcc3*, *abccc5*, *abcb1*,  
179 *abcb11*, and *abcg2*) were upregulated in response to TFM, whereas the two solute carrier family  
180 transcripts (*slc*; *slc35d2* and *slc22a15b*) were downregulated (Table 5). In the lamprey liver, a  
181 single *abc* and *slc* were the only transcripts differentially expressed in response to TFM (Table  
182 5). In contrast, the gills of bluegill exhibited differential expression of Phase III transcripts across  
183 all three timepoints consisting of four unique *abc*'s (*abca3*, *abcb1*, *abcb6*, and *abcc4*) and nine  
184 unique *slc*'s (Table 5). In most instances, these branchial *abc*'s and *slc*'s were upregulated in  
185 bluegill. In the bluegill liver, a single *abc* (*abcb6*) was found to be upregulated at 12 and 24 h of  
186 TFM exposure (Table 5). Aside from *slc47a1*, all of the five-remaining hepatic *slc*'s were found  
187 be upregulated under TFM treatment and with differential expression occurring at 12 and 24 h of  
188 exposure (Table 5).

189 *Overall transcriptome patterns*



190 The overall number of differentially expressed transcripts and their timing were different  
191 in the two species. In the sea lamprey, there was a delayed transcriptional response in the gills  
192 following TFM exposure (Fig. 1a). At 6 and 12 h, we observed only 139 and 9 differentially  
193 expressed superTranscriptome clusters, respectively (hereafter referred to as ‘clusters’).  
194 However, by 24 h, there were 7,055 differentially expressed clusters. In contrast, bluegill gill  
195 expression patterns were marked by a stepwise increase in the number of differentially expressed  
196 superTranscriptome clusters. A total of 595 and 2,662 differentially expressed clusters were  
197 already observed at 6 and 12 h of TFM exposure, respectively, although the total at 24 h (4,370)  
198 was less than the 24-h total in sea lamprey gills (Fig. 1b).

199 The livers of sea lamprey showed a muted pattern of transcriptional activity under TFM  
200 exposure with no changes in transcription within the first 12 h of exposure, and only 1,940  
201 differentially expressed clusters by 24 h (Fig. 1c). In bluegill, there were moderate levels of  
202 differential expression in the liver within the first 12 h of TFM exposure (388 and 1,464 at 6 and  
203 12 h, respectively), and the number had increased to 5,685 differentially expressed clusters by 24  
204 h of exposure (Fig. 1d).

#### 205 *Lamprey GO term enrichment*

206 In sea lamprey gills, TFM treatment resulted in an enrichment of GO terms associated  
207 with cellular growth and proliferation, immune function, and metabolism by 24 h of exposure.  
208 Specifically, in transcripts that were upregulated, GO terms associated with cellular proliferation  
209 and growth included regulation of cell proliferation, Ras protein signaling, regulation of I- $\kappa$ B  
210 kinase/signaling, and regulation of the cell cycle (Fig. 2a). GO terms related to immune function  
211 including viral life cycle, antigen processing, and negative regulation of type I interferon were  
212 also enriched for upregulated transcripts in sea lamprey (Fig. 2a). An upregulation in GO terms  
213 associated with energy metabolism, including “cellular response to insulin stimulus”, and  
214 “regulation of gluconeogenesis”, also featured prominently in the sea lamprey gill (Fig. 2a). Of  
215 the gluconeogenic transcripts that were enriched, we specifically observed an upregulation in  
216 mitochondrial pyruvate dehydrogenase kinase 2 (*pdk2*) and glycerol-3-phosphate phosphatase  
217 (*pgp*).

218 In sea lamprey liver, there were no differentially expressed transcripts at 6 h and 12 h of  
219 TFM exposure (Fig. 1c). At 24 h, there was an enrichment of upregulated transcripts associated



220 with the GO term “positive regulation of transcription” (Fig. 2b). Within this parent term, cell  
221 growth and survival GO terms were enriched, which included regulation of cell proliferation, fat  
222 cell differentiation, autophagy, and ubiquitination. Additionally, processes related to energy  
223 metabolism appeared to be upregulated as there was enrichment of transcripts associated with  
224 “cellular response to insulin stimulus” (e.g., *igf1r*, *insr*, *pck2*, *pdk2*) and “negative regulation of  
225 lipid storage” (e.g., *abca1*, *nfkbia*, *osbpl8*; Fig. 2b).

### 226 *Bluegill GO term enrichment*

227 In bluegill gills, there was enrichment of upregulated transcripts associated with cellular  
228 growth, proliferation, and death. For example, at 6 h of TFM exposure, there was enrichment of  
229 apoptotic processes regulation (Fig. 3a). By 12 h, this included a “positive regulation of cell  
230 proliferation”, “transforming growth factor  $\beta$  (TGF- $\beta$ ) responsiveness”, “regulation of  
231 autophagy”, “regulation of apoptotic process”, and “ubiquitin dependent processes” (Fig. 3a). By  
232 24 h, enrichment was largely restricted to cellular death including GO terms related to apoptosis  
233 and macroautophagy (Fig. 3a). Several transcripts associated with apoptosis, including *akt2*,  
234 several *bmp* and *map3k* transcripts, and *casp3*, were upregulated under TFM. For downregulated  
235 transcripts in the gill, there was also further enrichment of processes related to cellular growth  
236 and death (Fig. 3b). At 6 h, we observed a negative regulation of several growth-related  
237 processes including a “positive regulation of cell proliferation” and “Wnt signaling” (Fig. 3b).  
238 By 12 h, there was an enrichment of downregulated transcripts associated with “positive  
239 regulation of intracellular signal transduction” in the gill which included several growth-related  
240 processes (Fig. 3b). By 24 h, the parent term “cytokine-mediated signaling pathway” was the  
241 largest enriched parent term and included the downregulation of transcripts associated with  
242 several GO terms related to cell growth and survival, including cell proliferation, apoptosis, and  
243 G2/M mitotic transition (Fig. 3b).

244 The bluegill gill’s response to TFM treatment involved expression changes of transcripts  
245 associated with immune function. For upregulated transcripts, “negative regulation of  
246 macrophage derived foam cell differentiation” (12 h) and “cellular response to transforming  
247 growth factor beta stimulus” (12 and 24 h) were the main responses (Fig. 3a). However, there  
248 was a large enrichment of GO terms associated with the immune response in downregulated  
249 transcripts in the gill (Fig. 3b). At 12 h, cytokine signaling, and T cell migration were enriched.

250 By 24 h, the parent term “cytokine-mediated signaling pathway” included GO terms associated  
251 with immune function including “inflammatory response” and NF- $\kappa$ B signaling (Fig. 3b). There  
252 was also an enrichment of downregulated transcripts associated with the parent terms “antigen  
253 presentation via MHC class I” and “viral life cycle” (Fig. 3b).

254 TFM exposure also affected metabolic processes in bluegill gills. For upregulated  
255 transcripts, this included enrichment of lipid metabolism (e.g., *abca1*, *cyp1a1*, *angptl4*; 12 h),  
256 gluconeogenesis (e.g., *pdk2*, *pgp*, *ptpn2*; 12 h), reactive oxygen species (ROS; e.g., *cdkn1a*,  
257 *slc25a33*, *thbs1*; 12 h), and glucose import (*insr*, *irs2*, *c1qtnf12*; 24 h). In downregulated  
258 transcripts, enriched metabolic processes included a regulation of primary metabolic processes  
259 and cellular amino acid metabolic processes (Fig. 3b). Tangentially, there was also an  
260 enrichment of GO terms in upregulated transcripts that were associated with a response to an  
261 organic compound (6h; Fig. 3a), which included the upregulation of several transcript targets,  
262 notably cytochrome P450s (*cyp1a1* and *cyp1b1*), caspases (*casp3* and *casp7*), and an aryl  
263 hydrocarbon receptor (*ahr*).

264 In the bluegill liver, TFM effects were generally restricted to transcripts pertaining to  
265 cellular growth, proliferation, and cellular death. Specifically, in upregulated transcripts, there  
266 was an enrichment of the parent GO terms “regulation of autophagy” (6 h), “positive regulation  
267 of apoptotic process” (12 h), “macroautophagy” (24 h), and “ubiquitin-dependent protein  
268 catabolism” (24 h; Fig. 4a). At 24 h, there was also enrichment of cell growth/death GO terms  
269 for downregulated transcripts including regulation of programmed cell death and cell cycle  
270 G2/M transitions (Fig. 4b). TFM also led to an enrichment of metabolic functions in the bluegill  
271 liver. Specifically, glycogen metabolic processes were enriched in downregulated transcripts  
272 which corresponded with lower differential expression of a glycogen debrancher enzyme (*agl*),  
273  $\alpha$ -glucosidase (*gaa*), glycogen synthase (*gys2*), and glycogen phosphorylase (*pygl*; Fig. 4b).

## 274 **Discussion**

275 Variation in the availability and functional status of different detoxification pathways  
276 plays a critical role in determining the interspecific and intraspecific sensitivity of animals to  
277 different pesticides<sup>10</sup>. Accordingly, we predicted that interspecific variation in the expression and  
278 diversity of transcripts coding for biotransformation enzymes would partially explain the  
279 differences in TFM tolerances between sea lamprey and bluegill. As predicted, we identified

280 considerable interspecific variation in the transcriptomic responses to TFM exposure where all  
281 three suites of biotransformation transcripts (i.e., Phase I-III) were more diverse and responsive  
282 in bluegill relative to sea lamprey, suggesting a greater inherent ability to detoxify TFM. The  
283 differences in the transcriptome responses between the species supports an evolutionary basis of  
284 TFM tolerances in fishes. These results likely explain why >15-fold higher concentrations of  
285 TFM are required to produce a toxic effect in bluegill versus sea lamprey<sup>3</sup>, as well as the 10-fold  
286 higher 24 h LC<sub>10</sub> observed in bluegill compared to sea lamprey<sup>19</sup>. A functional transcriptomics  
287 approach has therefore provided us with greater insight into the molecular basis for the different  
288 sensitivities of these two species to TFM, and how transcriptomic responses associated with  
289 detoxification genes explains these observations (Fig. 5).

### 290 *Evolutionary considerations in lampricide tolerances*

291 We found that differences in the expression and diversity of biotransformation transcripts  
292 could help to explain interspecific variation in TFM sensitivity among target sea lamprey and  
293 non-target teleost fishes. Specifically, differences in *ugt* transcript diversity and expression were  
294 likely a major factor dictating TFM tolerances in fishes. Variation in detoxification capacities  
295 have been exploited to improve the specificity of pesticides used across a broad range of  
296 agricultural, commercial, and domestic settings, while minimizing impacts on non-target species.  
297 For example, current agricultural practices make use of a combination of bioengineered crop  
298 plants that are tolerant to pesticides (e.g., Roundup Ready™<sup>25</sup>) as well as using taxon-specific  
299 pesticides (e.g., 2,4-dichlorophenoxyacetic acid in cereal crops<sup>26</sup>) to selectively control  
300 dicotyledons (broadleaf plants) without harming valuable monocotyledon crops. In contrast,  
301 many chemical insecticides (e.g., organophosphates and neonicotinoids) are broad-spectrum  
302 rather than selective pesticides, with detrimental non-target effects generally being reduced by  
303 applying them in a selective manner (e.g., via spot treatments or in baits)<sup>27</sup>. Thus, furthering our  
304 understanding of the genetic, physiological, and evolutionary mechanisms driving variation in  
305 pesticide sensitivities can allow for the development of more effective and targeted pesticide  
306 applications that minimize impacts on non-target species<sup>2</sup>. As pesticides used as lampricides  
307 cannot be applied in this manner, understanding genetic variation in detoxification mechanisms  
308 is key in protecting local biodiversity.

309           The sea lamprey control program in the Laurentian Great Lakes is perhaps the most  
310 notable and successful example of pesticides use in an invasive vertebrate<sup>3</sup>. High specificity was  
311 key in ensuring minimal impacts on non-target species as the pesticide was being administered  
312 directly into the natural environment. During the 1950's, researchers conducted a large-scale  
313 series of toxicity tests, screening over 5,000 different compounds for an agent that could kill sea  
314 lamprey with higher selectivity than native species. Eventually, compounds containing a  
315 nitrophenol group were identified as the most selective agents, with TFM being the best  
316 substance<sup>28</sup>. Stream treatment with TFM has resulted in an estimated 90% reduction in sea  
317 lamprey populations in the Great Lakes<sup>3</sup>.

318           The exact mechanism underpinning the variation in TFM sensitivity among fishes has  
319 remained illusive. Phylogenetic variation in TFM sensitivity was apparent as closely related  
320 species (i.e., within order) demonstrated similarities in TFM toxicity values<sup>3,19</sup>. Notably, native  
321 lampreys had comparable toxicity values (i.e., minimum lethal concentration 99% [MLC99]) to  
322 sea lamprey and were also adversely affected by lampricide treatments<sup>29</sup>, suggesting a taxonomic  
323 basis for the sea lamprey's high sensitivity to TFM. Indeed, it is believed that Ugt's are the  
324 principal enzyme in TFM detoxification as part of Phase II biotransformation<sup>3,20,21,30</sup>. In sea  
325 lamprey, Ugt activities and numbers of *ugt* gene isoforms appear to be low relative to teleost  
326 fishes<sup>21-23</sup>, suggesting an underlying genetic basis in dictating TFM tolerances. The sea  
327 lamprey's phylogenetic position as a basal vertebrate could help explain the disparity in TFM  
328 tolerances. Lampreys diverged from the lineage leading to jawed vertebrates ~500 million years  
329 ago, most likely after one round of whole genome duplication (WGD), with the second WGD  
330 occurring only in jawed vertebrates<sup>31,32</sup> and a third WGD in teleosts<sup>31</sup>; these WGD events are  
331 important in allowing the generation of new traits that can facilitate adaptation<sup>31</sup>. Consequently,  
332 this provided teleosts with a more diverse set of detoxification genes relative to lampreys, and  
333 perhaps even to non-teleost fishes like lake sturgeon, which are moderately sensitive to TFM  
334 (although less than lampreys<sup>3</sup>).

### 335 *Patterns of ugt expression*

336           We show for the first time that there is a genetic basis underlying differences in TFM  
337 tolerances among target and non-target freshwater vertebrates. Specifically, bluegill had a larger  
338 diversity of *ugt*'s, compared to sea lamprey, and only bluegill showed differential expression of

339 *ugt*'s in their gill and liver transcriptomes due to TFM exposure. In line with our predictions, we  
340 showed that differences in *ugt* expression patterns between bluegill and sea lamprey are likely  
341 one of the main factors driving interspecific variation in TFM tolerance in fishes.

342 Bluegill exhibited differential expression in the *ugt* gene family including *ugt1*, *ugt2*, and  
343 *ugt3*. In bluegill, *ugt3* appeared to be the most important *ugt* transcript in both tissues as it was  
344 expressed at the highest levels and underwent the greatest fold-increase (upwards of 28x),  
345 compared to *ugt1* and *ugt2*. *ugt3* genes have not been identified in fishes previously and was  
346 only recently discovered in humans with their functional role remaining uncertain<sup>33</sup>. However,  
347 the Ugt3 enzyme appears to be involved in detoxifying polycyclic aromatic hydrocarbons, and 4-  
348 nitrophenol in mammals<sup>33</sup>, suggesting a role in TFM detoxification in bluegill as well. We also  
349 noted an upregulation of *ugt2b9* in the bluegill liver. Thus, hepatic biotransformation using *ugt3*  
350 and, to a lesser extent, *ugt2b9* may be a key factor in the high tolerance of bluegill to TFM  
351 compared to sea lamprey and perhaps other teleost fishes<sup>3</sup>.

#### 352 *Insight into detoxification pathways using transcriptomics*

353 Variation in the detoxification transcriptome between bluegill and sea lamprey was  
354 evident in genes associated with Phase I biotransformation, predominantly genes coding for  
355 *cyp*'s, which can detoxify organic compounds<sup>24</sup>. These enzymes may have a role in TFM  
356 detoxification as evident by the presence of Cyp-conjugated TFM metabolites in fishes<sup>21</sup>, but  
357 their relative importance compared to Phase II processes is uncertain. In both bluegill and sea  
358 lamprey, *cyp1a1* and *cyp1b1* appeared to be the dominant *cyp* transcripts that responded to TFM,  
359 which is unsurprising given that *cyp1* genes are involved in the detoxification of a diversity of  
360 organic compounds<sup>24</sup>. Interestingly, bluegill had a far greater magnitude of response, as evident  
361 by the high fold-changes in expression (upwards of ~187x), and a greater diversity of  
362 differentially expressed *cyp* transcripts, compared to sea lamprey. However, it is unclear how  
363 important Cyp's are for detoxifying TFM, as no studies have detected the corresponding Phase I  
364 metabolites *in vivo*, as compared to the Phase II sulfate and glucuronide conjugates<sup>21,22,34</sup>.  
365 Further studies, both *in vitro* and *in vivo*, are required to better understand the functional role of  
366 Cyp's in TFM biotransformation in both species.

367 Phase II biotransformation transcripts also showed a clear taxonomic divergence that may  
368 help explain interspecific variation in TFM tolerances. Bluegill exhibited an upregulation of  
369 sulfotransferases (N=3) and N-acetyltransferases (N =2) across both tissue types, whereas only a  
370 single sulfotransferase and glutathione S-transferase responded in sea lamprey gill. As  
371 sulfotransferases are important in TFM detoxification<sup>3,21</sup>, the greater capacity to conjugate via  
372 sulfation as well as through glucuronidation in bluegill likely supports high TFM metabolism  
373 when compared to sea lamprey. The presence of N-acetyltransferases in bluegill also suggests  
374 that TFM is undergoing acetylation<sup>24</sup>, which has been characterized in bluegill previously<sup>21</sup>. Our  
375 results suggest a taxonomic disparity in Phase II biotransformation pathways involved in TFM  
376 detoxification, with bluegill able to upregulate several Phase II biotransformation processes to  
377 effectively eliminate TFM compared with sea lamprey.

378 Interspecific variation was also evident in Phase III biotransformation processes, which  
379 are mainly involved in the transport and elimination of toxicants<sup>24</sup>. We detected a divergent  
380 effect of TFM exposure on Phase III transcripts where numbers of responding *abc* and *slc*  
381 transcripts were greater in sea lamprey and bluegill, respectively. This might suggest a disparity  
382 in TFM elimination routes given that *Abc*'s are generally active transporters while *Slc*'s are  
383 bidirectional passive transporters<sup>24</sup>. In the lamprey, the high *abc* response, as well as the general  
384 lack of transporter expression in the liver, may suggest a predominantly branchial-mediated  
385 elimination<sup>3</sup> as any TFM excretion would be against a concentration gradient (i.e. high  
386 environmental TFM concentration). In bluegill, the high environmental concentrations of TFM  
387 (~21 mg L<sup>-1</sup> [101 µM] in water, 23 nmol g<sup>-1</sup> ww in liver<sup>19</sup>) coupled with the lower branchial *abc*  
388 expression, relative to lamprey, suggests that TFM elimination can be through biliary/renal  
389 excretion as previously reported in teleosts<sup>3,30</sup>. Together, this appears to suggest that bluegill  
390 have a more responsive and effective system for TFM elimination.

#### 391 *GO term enrichment and tissue responses to TFM*

392 In fishes, studies of TFM toxicity have largely been restricted to characterizations of  
393 energy metabolism and mortality<sup>17,19</sup>. However, we found several biomarkers associated with  
394 inhibited cell cycle progression and growth, and higher levels of ubiquitination and apoptosis, in  
395 both bluegill and sea lamprey, suggesting that TFM's effects extend beyond simply uncoupling  
396 oxidative phosphorylation<sup>16,35</sup>, indicating a new mode of TFM toxicity in fishes. Increases in



397 ROS or oxidative damage are likely the primary mechanism by which mitochondrial uncouplers  
398 exert tissue-level repression of growth<sup>36</sup>. While TFM effects on ROS generation have not been  
399 quantified, TFM does increase mitochondrial respiration rates<sup>16</sup>, which may serve to elevate  
400 cellular ROS levels<sup>37</sup>. Coupled with the GO term enrichment patterns, our results suggest that  
401 TFM-induced ROS is likely mediating cellular arrest as seen in niclosamide<sup>38,39</sup> and 2,4-  
402 dinitrophenol (DNP, a TFM analogue)<sup>40,41</sup> exposures. While fish-specific examples are limited,  
403 zebrafish (*Danio rerio*) exposed to 4-nitrophenol experienced reduced cellular growth and  
404 proliferation, and heightened cell death<sup>36</sup>, aligning with our results. At a broader scale, increases  
405 in oxidative damage by ROS can impair cellular growth and cell cycle progression as well as  
406 inducing apoptosis in fishes<sup>42,43</sup>. Together, our results suggest that TFM has a potential role in  
407 generating oxidative damage in the cell.

408         Despite TFM toxicity primarily affecting energy metabolism<sup>3</sup>, enrichment of these  
409 metabolic GO terms was limited. In sea lamprey, there was a negative regulation of GO terms  
410 associated with lipid storage, gluconeogenesis, and insulin responsiveness. Likely, these changes  
411 were needed to increase energy mobilization for supporting heightened metabolic demands under  
412 TFM exposure<sup>17-19</sup>. In bluegill, metabolic changes included positive regulation on  
413 gluconeogenesis, glucose import, and lipid metabolism and negative regulation of glycogen  
414 metabolism suggesting that increased energetic expenditure during TFM exposure is likely  
415 occurring, probably due to increased rates of mitochondrial respiration and detoxification costs<sup>19</sup>.  
416 Also, as predicted, the effects of TFM on both species' transcriptomes was more apparent with  
417 longer exposure durations (i.e., more differentially expressed transcripts) suggesting an  
418 exhaustion of detoxification systems.

## 419 *Conclusions*

420         Here, we showed how transcriptome responses demonstrate interspecific variation in  
421 pesticide sensitivities, which are critical in developing more targeted invasive species control.  
422 We identified differences in *ugt* diversity and responsiveness to TFM, which appeared to be  
423 linked to differences in TFM sensitivities between bluegill and sea lamprey highlighting the  
424 importance of evolutionary history in mediating toxicity resilience. In the context of sea lamprey  
425 control, this knowledge will be useful in developing a predictive framework for assessing  
426 community-scale impacts of lampricides. More broadly, similar principles are likely to apply to a



427 wide range of systems where invasive species control efforts use pesticides extensively. By  
428 identifying key genes involved in detoxification in native fauna, we can develop methods for  
429 addressing the relative impacts that pesticide treatments have on a system. For TFM specifically,  
430 this would likely include developing screenings of Ugt's, Cyp's, and Sult's as potential  
431 biomarkers of exposure. This approach could help shed light on more subtle interspecific  
432 differences in sensitivity to TFM even among teleosts. As invasive species control efforts seek to  
433 provide more effective and targeted pesticide applications<sup>13</sup>, furthering our understanding of the  
434 toxicological mode of action and evolutionary variation in tolerances among species is likely to  
435 greatly improve the use of pesticides.

## 436 **Methods**

### 437 *Animal care and holding*

438 Fish collection and holding conditions are presented in Lawrence et al.<sup>19</sup>. Briefly,  
439 juvenile bluegill ( $n = 200$ ; total length [TL] =  $97.3 \pm 0.88$  mm; mass =  $25.51 \pm 0.75$  g) were  
440 sourced from Kinmount Fish Farm (Kinmount, ON, Canada) in September 2018. Bluegill were  
441 transported to the animal holding facility at Wilfrid Laurier University (Waterloo, ON, Canada;  
442 ~1000 L holding tank; ~ 0.5 L min<sup>-1</sup>; T = 12–14°C; pH 8.1–8.2, alkalinity ~255 mg L<sup>-1</sup> as  
443 CaCO<sub>3</sub>), where they were provided with a combination of commercial fish feed (EWOS #1,  
444 Cargill, ON, Canada) and bloodworms daily.

445 Larval sea lamprey ( $n = 568$ ; TL =  $104.94 \pm 0.69$  mm; mass =  $1.47 \pm 0.03$  g) were  
446 electrofished from a tributary of Lake Huron by the United States Fish and Wildlife Service in  
447 April 2018 and were temporarily stored at the Hammond Bay Biological Station (Millersburg,  
448 MI, USA). Sea lamprey were then transported to Wilfrid Laurier University and held under  
449 similar water conditions to the bluegill, although the lamprey tank was smaller (~100 L) and  
450 contained a 8–10 cm deep layer of sand to facilitate natural burrowing<sup>44</sup>. Lamprey were fed on a  
451 diet of baker's yeast weekly (see Lawrence et al.<sup>19</sup> for specific details). All experimental series  
452 were conducted under approval from the Wilfrid Laurier University Animal Care Committee  
453 (Animal Use Protocol No. R18001) under the guidelines established by the Canadian Council of  
454 Animal Care.

### 455 *TFM exposures*

456 Larval sea lamprey and bluegill were exposed to either control conditions (i.e., no  
457 toxicant) or field grade TFM (35% active ingredient dissolved in isopropanol; Clariant,  
458 Griesheim, Germany) for up to 24 h. The TFM exposure concentrations were equivalent to the  
459 species-specific concentration of TFM that was lethal to 10% of each species over 24 h (24-h  
460 LC<sub>10</sub>), previously determined for the cohorts of sea lamprey (24-h LC<sub>10</sub> = 2.21 mg L<sup>-1</sup>) and  
461 bluegill (24-h LC<sub>10</sub> = 22.06 mg L<sup>-1</sup>)<sup>19</sup>. Exposures were performed in triplicate with animals being  
462 held in glass aquaria (10 L for sea lamprey larvae, 14 L for bluegill) in groups of 2–3 or 6  
463 individuals per tank for bluegill and sea lamprey larvae, respectively. The TFM exposures were  
464 static with temperature being maintained at the fish's acclimation temperature (~14–15°C).  
465 Tissue sampling at 6 h, 12 h, and 24 h of exposure. At these discrete intervals, fish were netted  
466 and placed one at a time into buffered tricaine methanesulfonate (MS-222; Syndel, Nanaimo,  
467 BC, Canada; 1.5 g L<sup>-1</sup> MS-222 with 3.0 g L<sup>-1</sup> NaHCO<sub>3</sub>) to euthanize the animals. The livers and  
468 gill of both species were excised, and placed into *RNAlater* (Invitrogen, ThermoFisher  
469 Scientific, Mississauga, ON, Canada), held at 4°C for at least 24 h, and then stored at -80°C for  
470 later RNA extraction.

#### 471 *RNA extraction and transcriptome sequencing*

472 Extractions of total RNA were performed using a commercially available kit (RNeasy  
473 Plus Mini Kit; Qiagen, Toronto, ON, Canada) according to the manufacturer's specifications.  
474 Following extraction, an initial quality control check was performed using the 260/280  
475 absorbance ratio and the 260/230 absorbance ratio with a NanoDrop One Microvolume UV-Vis  
476 Spectrophotometer (ThermoFisher, Mississauga, ON, Canada). Quality was further assessed  
477 using a Qubit RNA IQ assay (ThermoFisher, Mississauga, ON, Canada), read on a Qubit 4  
478 fluorometer (ThermoFisher, Mississauga, ON, Canada), as a final check of RNA integrity.  
479 Samples were then diluted to a standardized volume (50 ng μL<sup>-1</sup>) and stored at -80°C until  
480 shipment to the sequencing facility.

481 RNA-seq library preparation and sequencing were performed by the Centre d'Expertise  
482 et de Services Génome Québec (Montreal, QC, Canada). Before sequencing, samples were again  
483 verified for integrity using both spectrophotometry (NanoDrop ND 1000; ThermoFisher,  
484 Mississauga, ON, Canada) and electrophoresis (Bioanalyzer 2100; Agilent, Santa Clara, CA,  
485 USA; RIN ranges: sea lamprey, 8.4–10.0; bluegill 8.5–9.8). Sequencing of cDNA libraries was

486 achieved using the NovaSeq 6000 sequencing system (Illumina, Vancouver, BC, Canada). Total  
487 sequencing read counts can be found in Table S1.

488 *Transcriptome assembly, alignment, and annotation*

489 RNA-seq QC

490 Raw reads were downloaded from Genome Quebec for processing and downstream  
491 analysis on a University of Manitoba personal Linux Server, as well as supercomputers  
492 belonging to Westgrid (Grex) and Compute Canada (Beluga, Cedar, and Graham). Fastqc (v  
493 0.11.9) was run on the raw sequencing data to assess quality, and MultiQC  
494 (<https://github.com/ewels/MultiQC>) was used to generate reports from the Fastqc for easier  
495 viewing across samples<sup>45,46</sup>. It is important to note here that RNA-seq data files contained  
496 sequencing data from fish exposed to TFM as well as those exposed to niclosamide or a mixture  
497 of TFM and niclosamide. The latter two exposures are part of a complementary but ongoing  
498 study and are not included in the final results here. Raw sequencing quality and duplication rates  
499 met our expectations across all 148 sea lamprey samples and all 163 bluegill samples (combined  
500 numbers of gill and liver tissue for each species that were obtained from the exposure series).  
501 Adapters were trimmed from the raw sequences using Trimmomatic (v0.36), Fastqc and  
502 MultiQC were run again to ensure successful trimming<sup>47</sup>.

503 *De novo* transcriptome assembly

504 Since bluegill does not have a reference genome to map reads back to, *de novo*  
505 transcriptome assembly was carried out for both bluegill and sea lamprey to keep methods  
506 consistent<sup>48</sup>. These *de novo* assemblies were each constructed from a list containing a single  
507 library for each tissue and timepoint. These input libraries were selected based on the highest  
508 read count, accounting for duplication rates for each condition. For bluegill ( $n = 26$ ), we used  
509 one paired-end library from liver and gill for each of the following treatments and timepoints: 6,  
510 12, and 24 h for niclosamide ( $n = 6$ ), TFM ( $n = 6$ ) and TFM:niclosamide mixture ( $n = 6$ ), as well  
511 as 0, 6, 12, and 24 h for the control ( $n = 8$ ). For lamprey ( $n = 22$ ), paired-end libraries from liver  
512 and gill for 6, 12, and 24 h for niclosamide ( $n = 6$ ), TFM ( $n = 6$ ), and control ( $n = 6$ ) were used,  
513 but the TFM:niclosamide mixture only had libraries at 6 and 12 h ( $n = 4$ ), since the combination  
514 killed 93% of all lamprey by 12 h of exposure (see Lawrence et al.<sup>19</sup>).

515 Each assembly was generated using Trinity (v2.8.5), run with the following command:  
516 Trinity --max\_memory 250G --seqType fq --samples\_file samples.txt --KMER\_SIZE 25 --  
517 SS\_lib\_type RF --CPU 24 --bflyCalculateCPU --output full\_trinity\_assembly &>log\_RF\_2.txt  
518 &<sup>49</sup>. Following Trinity, the completeness of the assemblies was assessed using BUSCO (v4.1.4)  
519 to test for the presence of Benchmarking Universal Single Copy Orthologs that are conserved  
520 within all eukaryotes using the eukaryota\_odb10 database<sup>50</sup>. The bluegill assembly was 98.4%  
521 complete with one fragmented and three missing BUSCOs out of the database of 255. The sea  
522 lamprey was 96.1% complete with six fragmented and four missing BUSCOs (Table 1). These  
523 results are comparable to a recently published *de novo* larval sea lamprey transcriptome  
524 assembled from muscle, liver, and brain. The bluegill assembly had 559,416,397 assembled  
525 bases in 498,997 transcripts with a median contig length of 413, contig N50 of 2,992, and %GC  
526 of 44.38. The sea lamprey assembly had 377,365,173 assembled bases in 474,000 transcripts  
527 with a median contig length of 358, contig N50 of 1,648, and %GC of 53.10.

#### 528 De novo transcriptome annotation

529 Trinity assemblies were processed with the Trinotate (v3.2) annotation protocol  
530 (<http://trinotate.github.io>), which incorporates many bioinformatics tools, namely TransDecoder  
531 (v5.5.0), BLASTP (v 2.10.0), BLASTX (v2.10.0), HMMER (packaged in Trinotate v3.2),  
532 TMHMM (v2.0c), SignalP (v4.1), and RNAmmer (packaged in Trinotate v3.2) to identify open  
533 reading frames (ORFs) within the assembly and test these ORFs against databases of known  
534 proteins, mRNA transcripts, transmembrane helices, signal peptides, and ribosomal RNA  
535 sequences in order to provide candidate annotations and gene ontology (GO) terms for  
536 transcripts within the assembly<sup>49,51–55</sup>. Predicted annotations were used in downstream  
537 differential expression analyses.

#### 538 Super transcriptome assembly

539 Although *de novo* assemblies are often essential when reference genomes do not exist,  
540 carrying out differential expression analyses on raw assemblies is complicated by the fact that  
541 multiple transcripts are often generated for each gene. To combat this issue, we used the Corset-  
542 Lace pipeline (<https://github.com/Oshlack/Lace>) to generate SuperTranscripts from our *de novo*  
543 assemblies. First, we mapped reads back to the Trinity assembly using Bowtie2, then carried out  
544 hierarchical clustering of transcripts based on shared reads and expression across transcripts,

545 finally creating an assembly of SuperTranscripts based on clustering of gene groups<sup>56–58</sup>. For  
546 bluegill, Corset-Lace reduced 498,997 transcripts to 109,702 SuperTranscripts, and 474,000  
547 transcripts were reduced to 129,219 SuperTranscripts in sea lamprey. These  
548 SuperTranscriptomes were run through BUSCO, as above, and bluegill SuperTranscriptome  
549 displayed 84.7% completeness, whereas the lamprey reported 91% completeness. Although both  
550 of these measures are slight decreases from the original 98.4% and 96.1% for bluegill and  
551 lamprey, respectively, the biggest change in the BUSCO report was the number of complete and  
552 single-copy BUSCOs compared to the number of complete and duplicated BUSCOs (Table S2).

553 Given that the genes in the BUSCO list represent Benchmarking Universal Single-Copy  
554 Orthologs across eukaryotes, the high percentage of “complete duplicated BUSCOs (D)”, 58.8%  
555 and 60.4% in bluegill and lamprey, respectively, indicated that our *de novo* Trinity assemblies  
556 contained numerous transcripts for the same gene, which would be problematic when assessing  
557 differential expression. Our SuperTranscriptomes decreased the overall transcript number in our  
558 assemblies by ~3.4–4.5 times, slightly decreased the overall percentage of complete BUSCOs  
559 (the sum of single-copy and duplicated BUSCOs) by ~1.05–1.15 times, but most importantly,  
560 decreased the number of duplicated BUSCOs by ~17–21 times. The Corset-Lace pipeline greatly  
561 increased the number of complete single-copy BUSCOs (S) for both species. Although the  
562 Corset-Lace pipeline resulted in slightly fewer genes overall, we believe that those remaining  
563 were better assembled, with far fewer genes present across multiple transcripts in the assembly,  
564 which increased our power for differential expression analyses.

### 565 *Differential expression analyses*

566 Reads from bluegill and lamprey TFM experimental and control conditions were mapped to  
567 the corresponding SuperTranscriptome using STAR (v2.6.1a)<sup>59</sup>. The resulting BAM files from  
568 STAR were used to generate transcript counts using featureCounts (part of subread v2.0.0)<sup>60</sup> for  
569 both exon and transcript-based analyses.

570 Transcriptomic analysis was performed in R studio (v1.3.1093) using the R programming  
571 language (v3.5.1)<sup>61</sup>. Principal analyses of differential expression patterns were performed using  
572 the package ‘edgeR’ (v3.24.3)<sup>62,63</sup> using a quasi-likelihood pipeline<sup>64</sup>. Count data were first  
573 filtered to remove lowly expressed genes with the “filterByExpr” function which used the  
574 experimental design matrix to determine minimum gene count thresholds. Filtered count data

575 were then normalized using the trimmed mean of M-values<sup>65</sup>. At this point, normalized data were  
576 visually inspected using principal component analysis (PCA; packages ‘FactoMineR’<sup>66</sup> and  
577 ‘factoextra’<sup>67</sup>; see Fig. S1) and a multi-dimensional scaling (MDS) plot (package ‘Glimma’<sup>68</sup>).  
578 Individual samples were also visually inspected using a mean difference (MD) plot.

579 To determine patterns of differential expression, count data were first modeled against a  
580 negative binomial distribution<sup>63</sup>. From this, we obtained dispersal estimates using a Cox-Reid  
581 profile adjusted likelihood method<sup>63</sup>, which were visually inspected by use of a biological  
582 coefficient of variation (BCV) plot. Quasi-likelihood (QL) dispersion estimates were determined  
583 and were subject to a QL F-test to determine transcripts that had statistically significant  
584 differential gene expression<sup>69</sup>. From the resulting QL F-tests, we pulled out pairwise contrasts of  
585 interest which include control versus TFM exposed fish for each timepoint of exposure (i.e., 6,  
586 12, 24 h). Statistical significance of pairwise comparison was accepted at  $\alpha = 0.05$  where all  $p$ -  
587 values were adjusted for false discovery rates (FDR) via a Benjamini-Hochberg correction<sup>70</sup>.

#### 588 *Enrichment analyses*

589 One of our primary goals was to ascertain specific pathways and processes that were  
590 underlying the transcriptome response to TFM exposure. To do so, we conducted analyses in  
591 pathway enrichment using the R package ‘enrichR’ (v2.1)<sup>71</sup>, which allows R access to the  
592 Enrichr databases (<https://maayanlab.cloud/Enrichr/>)<sup>72</sup>. This platform compares differentially  
593 expressed genes in a dataset and determines a list of GO terms that are enriched under the  
594 experimental treatment<sup>72</sup>. Here, we used three main databases for comparison:  
595 GO\_Biological\_Process\_2018, GO\_Molecular\_Function\_2018, and  
596 GO\_Cellular\_Component\_2018. Before making database comparisons, unannotated  
597 superTranscript clusters were removed from the analysis. For annotated transcripts, UniProt gene  
598 names were retrieved using the UniProt’s Retrieve/ID mapping tool  
599 (<https://www.uniprot.org/uploadlists/>). In each transcripts list enrichR was run and GO term lists  
600 were subsequently filtered for those that were statistically significant (adjusted  $p$ -value < 0.05)  
601 and had four or more genes associated with a particular GO term<sup>73</sup>.

602 To identify general patterns and biological features of interest, we simplified the resulting  
603 enrichR GO term lists using a web-based platform, REVIGO (<http://revigo.irb.hr/>)<sup>74</sup>, which  
604 summarizes GO term patterns by grouping terms based on their similarity and then creates a



605 hierarchical structure of the terms<sup>74</sup>. Our REVIGO analyses were at a similarity level of 0.5 (i.e.,  
606 small) and used the adjusted *p*-values generated from enrichR. Treemap files from the REVIGO  
607 output were used to generate GO term enrichment plots in ggplot2<sup>75</sup>. To reduce term  
608 redundancy, we opted to only use biological processes and molecular functions from the  
609 REVIGO analysis. In cases where the biological processes and molecular functions provided  
610 functionally similar results, only the biological processes were displayed in the Results section  
611 with the molecular functions being available in the Supplementary Materials. Similarly,  
612 summary plots that offered no insight on specific processes (e.g., DNA replication, protein  
613 kinase activity, GTPase activities, etc.) were placed into Supplementary Materials.

#### 614 *Identification of differentially expressed detoxification transcripts*

615 We next sought to identify specific mechanisms underlying TFM detoxification and  
616 understand species-specific differences in detoxification ability (see Lawrence et al.<sup>19</sup> for a  
617 review). To achieve these goals, we also incorporated a targeted approach, which required us to  
618 identify known and suspected candidates for TFM detoxification, including *ugt*'s, one of the  
619 principal enzymes believed to be involved in Phase II TFM detoxification (see Wilkie et al.<sup>3</sup>), as  
620 well as other enzymes/proteins involved with Phases I, II, and III of detoxification. In the case of  
621 *ugt* transcripts, *ugt*-associated transcripts were first identified in each species' annotated  
622 transcriptome. These transcripts were then used to filter each list of species- and tissue-specific  
623 differentially expressed transcripts to examine how these enzymes responded to TFM exposure.

624 In the case of the Phase I–III proteins, we opted to filter a broad list of common protein  
625 families involved in detoxification from the differentially expressed transcripts lists and then  
626 manually check their functional role based on their UniProt IDs. As discussed in the Results, we  
627 filtered transcripts in the transcriptome associated with detoxification, xenobiotic removal,  
628 and/or organic compound breakdown. In the case of Phase III transcripts, we also included  
629 transporters that were involved in organic ion transport and those transporting UDP/glucuronide  
630 substrates. Phase I search terms included cytochromes P450 (CYPs), alcohol dehydrogenase  
631 (ADH), aldehyde dehydrogenase (ALDH), monoamine oxidases (MAO), and paraoxonases  
632 (PON). Phase II protein search terms included sulfotransferases (SULT), glutathione transferases  
633 (GST), glycine N-methyltransferase (GLYAT), N-terminal acetyltransferases (NAT), and



634 methyltransferases (MT). Phase III search terms included solute carrier's (SLC) and ATP-  
635 binding cassette (ABC) transporters.

### 636 Code and Data Availability

637 All commands and scripts used for quality control (QC), assembly, annotation, read  
638 mapping, transcript counting and RNAseq analyses are available at [https://github.com/phil-  
639 grayson/transcriptome\\_lawrence\\_jeffries/](https://github.com/phil-grayson/transcriptome_lawrence_jeffries/). The raw sequence reads are available at the National  
640 Center for Biotechnology Information Sequence Read Archive (accession number  
641 SUB8714632). Gene lists and GO term list can be found in the Supplementary Materials.

### 642 **Acknowledgements**

643 Funding for the research was provided by the Great Lakes Fishery Commission  
644 (2018\_JEF\_54072). The authors would like to thank Dr. Oana Birceanu for logistical assistance,  
645 Fisheries and Oceans Canada for providing the TFM used in this study, Darren Foubister and  
646 Josh Sutherby for conducting the exposures, and Drs. Sara Good and Matthew Doering, who  
647 provided helpful discussion and comments for completing the *de novo* assembly and the gene  
648 annotations, and the crew at the U.S. Geological Survey's Hammond Bay Biological Station for  
649 collecting the larval lamprey used in this study.

### 650 **Contributions**

651 KMJ, MPW, RGM, JMW, CJG, and MFD were responsible for the experimental design. The  
652 labs of KMJ and MPW carried out the exposures and sample collection. Data and sample  
653 analyses were conducted by MJL, PG, and JDJ. The first draft of the manuscript was written by  
654 MJL and PG, with all authors contributing to the refinement and production of the final  
655 manuscript.

656

657

658

659

660

661 **References:**

- 662 1. Lovell, S. J., Stone, S. F. & Fernandez, L. The economic impacts of aquatic invasive species:  
663 a review of the literature. *Agricultural and Resource Economics Review* **35**, 195–208 (2006).
- 664 2. Gherardi, F. & Angiolini, C. Eradication and control of invasive species. in *Biodiversity*  
665 *Conservation and Habitat Management*. (eds. Gherardi, F., Corti, C. & Gualtieri, M.) vol. 2  
666 271–299 (2007).
- 667 3. Wilkie, M. P., Hubert, T. D., Boogaard, M. A. & Birceanu, O. Control of invasive sea  
668 lampreys using the piscicides TFM and niclosamide: Toxicology, successes & future  
669 prospects. *Aquatic Toxicology* **211**, 235–252 (2019).
- 670 4. Mahmood, I., Imadi, S. R., Shazadi, K., Gul, A. & Hakeem, K. R. Effects of pesticides on  
671 environment. in *Plant, Soil and Microbes* (eds. Hakeem, K. R., Akhtar, M. S. & Abdullah, S.  
672 N. A.) 253–269 (Springer International Publishing, 2016). doi:10.1007/978-3-319-27455-  
673 3\_13.
- 674 5. Bridges, C. M. & Semlitsch, R. D. Variation in pesticide tolerance of tadpoles among and  
675 within species of Ranidae and patterns of amphibian decline. *Conservation Biology* **14**,  
676 1490–1499 (2000).
- 677 6. Daam, M. A. & Rico, A. Freshwater shrimps as sensitive test species for the risk assessment  
678 of pesticides in the tropics. *Environmental Science and Pollution Research* **25**, 13235–13243  
679 (2018).
- 680 7. Pickering, Q. H., Henderson, C. & Lemke, A. E. The Toxicity of Organic Phosphorus  
681 Insecticides to Different Species of Warmwater Fishes. *Transactions of the American*  
682 *Fisheries Society* **91**, 175–184 (1962).

- 683 8. Nyman, A.-M., Schirmer, K. & Ashauer, R. Importance of toxicokinetics for interspecies  
684 variation in sensitivity to chemicals. *Environmental Science & Technology* **48**, 5946–5954  
685 (2014).
- 686 9. Guénard, G., Ohe, P. C. von der, de Zwart, D., Legendre, P. & Lek, S. Using phylogenetic  
687 information to predict species tolerances to toxic chemicals. *Ecological Applications* **21**,  
688 3178–3190 (2011).
- 689 10. Reid, N. M. & Whitehead, A. Functional genomics to assess biological responses to marine  
690 pollution at physiological and evolutionary timescales: toward a vision of predictive  
691 ecotoxicology. *Briefings in Functional Genomics* **15**, 358–364 (2016).
- 692 11. Eide, M. *et al.* The chemical defensome of five model teleost fish. *Scientific Reports* **11**,  
693 10546 (2021).
- 694 12. Byers, J. E. *et al.* Directing research to reduce the impacts of nonindigenous species.  
695 *Conservation Biology* **16**, 630–640 (2002).
- 696 13. Marsden, J. E. & Siefkes, M. J. Control of invasive sea lamprey in the Great Lakes, Lake  
697 Champlain, and Finger Lakes of New York. in *Lampreys: biology, conservation and control*  
698 (ed Docker, M.F.) 411–479 (Springer, 2019).
- 699 14. McDonald, D. G. & Kolar, C. S. Research to guide the use of lampricides for controlling sea  
700 lamprey. *Journal of Great Lakes Research* **33**, 20–34 (2007).
- 701 15. Hepditch, S. L. J., Birceanu, O. & Wilkie, M. P. A toxic unit and additive index approach to  
702 understanding the interactions of 2 piscicides, 3-trifluoromethyl-4-nitrophenol and  
703 niclosamide, in rainbow trout. *Environmental Toxicology and Chemistry* **40**, 1419–1430  
704 (2021).

- 705 16. Birceanu, O., McClelland, G. B., Wang, Y. S., Brown, J. C. L. & Wilkie, M. P. The  
706 lampricide 3-trifluoromethyl-4-nitrophenol (TFM) uncouples mitochondrial oxidative  
707 phosphorylation in both sea lamprey (*Petromyzon marinus*) and TFM-tolerant rainbow trout  
708 (*Oncorhynchus mykiss*). *Comparative Biochemistry and Physiology Part C: Toxicology &*  
709 *Pharmacology* **153**, 342–349 (2011).
- 710 17. Wilkie, M. P., Holmes, J. A. & Youson, J. H. The lampricide 3-trifluoromethyl-4-  
711 nitrophenol (TFM) interferes with intermediary metabolism and glucose homeostasis, but not  
712 with ion balance, in larval sea lamprey (*Petromyzon marinus*). *Canadian Journal of*  
713 *Fisheries and Aquatic Sciences* **64**, 1174–1182 (2007).
- 714 18. Birceanu, O., McClelland, G. B., Wang, Y. S. & Wilkie, M. P. Failure of ATP supply to  
715 match ATP demand: The mechanism of toxicity of the lampricide, 3-trifluoromethyl-4-  
716 nitrophenol (TFM), used to control sea lamprey (*Petromyzon marinus*) populations in the  
717 Great Lakes. *Aquatic Toxicology* **94**, 265–274 (2009).
- 718 19. Lawrence, M. J. *et al.* Contrasting physiological responses between invasive sea lamprey and  
719 non-target bluegill in response to acute lampricide exposure. *Aquatic Toxicology* **237**,  
720 105848 (2021).
- 721 20. Lech, J. J. & Statham, C. N. Role of glucuronide formation in the selective toxicity of 3-  
722 trifluoromethyl-4-nitrophenol (TFM) for the sea lamprey: comparative aspects of TFM  
723 uptake and conjugation in sea lamprey and rainbow trout. *Toxicology and Applied*  
724 *Pharmacology* **31**, 150–158 (1975).
- 725 21. Bussy, U. *et al.* Metabolism of a sea lamprey pesticide by fish liver enzymes part A:  
726 identification and synthesis of TFM metabolites. *Analytical and Bioanalytical Chemistry*  
727 **410**, 1749–1761 (2018).

- 728 22. Kane, A. S., Kahng, M. W., Reimschuessel, R., Nhamburo, P. T. & Lipsky, M. M. UDP-  
729 glucuronyltransferase kinetics for 3-trifluoromethyl-4-nitrophenol (TFM) in fish.  
730 *Transactions of the American Fisheries Society* **123**, 217–222 (1994).
- 731 23. Lantz, S. R. *et al.* Next Generation Lampricides: A three-stage process to develop improved  
732 control tools for invasive sea lamprey. *Canadian Journal of Fisheries and Aquatic Sciences*  
733 (2021).
- 734 24. Smart, R.C., & Hodgson, E. *Molecular and Biochemical Toxicology*. (Wiley, 2018).
- 735 25. Funke, T., Han, H., Healy-Fried, M. L., Fischer, M. & Schönbrunn, E. Molecular basis for  
736 the herbicide resistance of Roundup Ready crops. *PNAS* **103**, 13010–13015 (2006).
- 737 26. Peterson, M. A., McMaster, S. A., Riechers, D. E., Skelton, J. & Stahlman, P. W. 2,4-D Past,  
738 present, and future: a review. *Weed Technology* **30**, 303–345 (2016).
- 739 27. Costa, L. G. Current issues in organophosphate toxicology. *Clinica Chimica Acta* **366**, 1–13  
740 (2006).
- 741 28. Brant, C. *Great Lakes sea lamprey: the 70 year war on a biological invader*. (University of  
742 Michigan Press, 2019).
- 743 29. Neave, F. B. *et al.* Changes in native lamprey populations in the Great Lakes since the onset  
744 of sea lamprey (*Petromyzon marinus*) control. *Journal of Great Lakes Research*  
745 S0380133020302422 (2020) doi:10.1016/j.jglr.2020.10.005.
- 746 30. Lech, J. J. & Costrini, N. V. In vitro and in vivo metabolism of 3-trifluoromethyl-4-  
747 nitrophenol (TFM) in rainbow trout. *Comparative and General Pharmacology* **3**, 160–166  
748 (1972).
- 749 31. Glasauer, S. M. K. & Neuhauss, S. C. F. Whole-genome duplication in teleost fishes and its  
750 evolutionary consequences. *Molecular Genetics and Genomics* **289**, 1045–1060 (2014).

- 751 32. Smith, J. J. *et al.* The sea lamprey germline genome provides insights into programmed  
752 genome rearrangement and vertebrate evolution. *Nature Genetics* **50**, 270–277 (2018).
- 753 33. Meech, R. *et al.* The UDP-glycosyltransferase (UGT) superfamily: new members, new  
754 functions, and novel paradigms. *Physiological Reviews* **99**, 1153–1222 (2019).
- 755 34. Bussy, U. *et al.* Metabolism of a sea lamprey pesticide by fish liver enzymes part B: method  
756 development and application in quantification of TFM metabolites formed in vivo.  
757 *Analytical and Bioanalytical Chemistry* **410**, 1763–1774 (2018).
- 758 35. Huerta, B. *et al.* Sea lamprey cardiac mitochondrial bioenergetics after exposure to TFM and  
759 its metabolites. *Aquatic Toxicology* **219**, 105380 (2020).
- 760 36. Lam, S. H. *et al.* Molecular insights into 4-nitrophenol-induced hepatotoxicity in zebrafish:  
761 Transcriptomic, histological and targeted gene expression analyses. *Biochimica et*  
762 *Biophysica Acta (BBA) - General Subjects* **1830**, 4778–4789 (2013).
- 763 37. Nickel, A., Kohlhaas, M. & Maack, C. Mitochondrial reactive oxygen species production  
764 and elimination. *Journal of Molecular and Cellular Cardiology* **73**, 26–33 (2014).
- 765 38. Jin, Y. *et al.* Antineoplastic mechanisms of niclosamide in acute myelogenous leukemia stem  
766 cells: inactivation of the NF- $\kappa$ B pathway and generation of reactive oxygen species. *Cancer*  
767 *Research* **70**, 2516–2527 (2010).
- 768 39. Hamdoun, S., Jung, P. & Efferth, T. Drug repurposing of the anthelmintic niclosamide to  
769 treat multidrug-resistant leukemia. *Frontiers in Pharmacology* **8**, (2017).
- 770 40. Miyoshi, N., Oubrahim, H., Chock, P. B. & Stadtman, E. R. Age-dependent cell death and  
771 the role of ATP in hydrogen peroxide-induced apoptosis and necrosis. *Proceedings of the*  
772 *National Academy of Sciences* **103**, 1727–1731 (2006).

- 773 41. Han, Y. H., Kim, S. Z., Kim, S. H. & Park, W. H. 2,4-Dinitrophenol induces apoptosis in  
774 As4.1 juxtglomerular cells through rapid depletion of GSH. *Cell Biology International* **32**,  
775 1536–1545 (2008).
- 776 42. Espinosa Ruiz, C. *et al.* Sub-lethal doses of polybrominated diphenyl ethers affect some  
777 biomarkers involved in energy balance and cell cycle, via oxidative stress in the marine fish  
778 cell line SAF-1. *Aquatic Toxicology* **210**, 1–10 (2019).
- 779 43. Morcillo, P., Esteban, M. Á. & Cuesta, A. Heavy metals produce toxicity, oxidative stress  
780 and apoptosis in the marine teleost fish SAF-1 cell line. *Chemosphere* **144**, 225–233 (2016).
- 781 44. Scott, W. B. & Crossman, E. J. *Freshwater Fishes of Canada*. (Fisheries Research Board of  
782 Canada, 1973).
- 783 45. Andrews, S. FastQC: A Quality Control Tool for High Throughput Sequence Data [Online].  
784 (2010).
- 785 46. Ewels, P., Magnusson, M., Lundin, S. & Källér, M. MultiQC: Summarize analysis results for  
786 multiple tools and samples in a single report. *Bioinformatics* **32**, 3047–3048 (2016).
- 787 47. Bolger, A. M., Lohse, M. & Usadel, B. Trimmomatic: A flexible trimmer for Illumina  
788 sequence data. *Bioinformatics* **30**, 2114–2120 (2014).
- 789 48. Smith, J. J. *et al.* Sequencing of the sea lamprey (*Petromyzon marinus*) genome provides  
790 insights into vertebrate evolution. *Nature Genetics* **45**, 415–421 (2013).
- 791 49. Haas, B. J. *et al.* *De novo transcript sequence reconstruction from RNA-Seq: reference*  
792 *generation and analysis with Trinity*. *Nature Protocols* vol. 8 (2013).
- 793 50. Simão, F. A., Waterhouse, R. M., Ioannidis, P., Kriventseva, E. V. & Zdobnov, E. M.  
794 BUSCO: Assessing genome assembly and annotation completeness with single-copy  
795 orthologs. *Bioinformatics* **31**, 3210–3212 (2015).



- 796 51. Altschul, S. F., Gish, W., Miller, W., Myers, E. W. & Lipman, D. J. Basic local alignment  
797 search tool. *Journal of Molecular Biology* **215**, 403–410 (1990).
- 798 52. Eddy, S. R. Profile hidden Markov models. *Bioinformatics* **14**, 755–763 (1998).
- 799 53. Krogh, A., Larsson, B., Von Heijne, G. & Sonnhammer, E. L. L. Predicting transmembrane  
800 protein topology with a hidden Markov model: Application to complete genomes. *Journal of*  
801 *Molecular Biology* **305**, 567–580 (2001).
- 802 54. Nielsen, H. Predicting secretory proteins with signalP. *Methods in Molecular Biology* **1611**,  
803 59–73 (2017).
- 804 55. Lagesen, K. *et al.* RNAmmer: Consistent and rapid annotation of ribosomal RNA genes.  
805 *Nucleic Acids Research* **35**, 3100–3108 (2007).
- 806 56. Langmead, B. & Salzberg, S. L. Fast gapped-read alignment with Bowtie 2. *Nature Methods*  
807 **9**, 357–359 (2012).
- 808 57. Davidson, N. M. & Oshlack, A. Corset: Enabling differential gene expression analysis for de  
809 novo assembled transcriptomes. *Genome Biology* **15**, 1–14 (2014).
- 810 58. Davidson, N. M., Hawkins, A. D. K. & Oshlack, A. SuperTranscripts: A data driven  
811 reference for analysis and visualisation of transcriptomes. *Genome Biology* **18**, 1–10 (2017).
- 812 59. Dobin, A. *et al.* STAR: Ultrafast universal RNA-seq aligner. *Bioinformatics* **29**, 15–21  
813 (2013).
- 814 60. Liao, Y., Smyth, G. K. & Shi, W. featureCounts: An efficient general purpose program for  
815 assigning sequence reads to genomic features. *Bioinformatics* **30**, 923–930 (2014).
- 816 61. R Core Team (2020). — European Environment Agency. [https://www.eea.europa.eu/data-](https://www.eea.europa.eu/data-and-maps/indicators/oxygen-consuming-substances-in-rivers/r-development-core-team-2006)  
817 [and-maps/indicators/oxygen-consuming-substances-in-rivers/r-development-core-team-](https://www.eea.europa.eu/data-and-maps/indicators/oxygen-consuming-substances-in-rivers/r-development-core-team-2006)  
818 2006.

- 819 62. Robinson, M. D., McCarthy, D. J. & Smyth, G. K. edgeR: a Bioconductor package for  
820 differential expression analysis of digital gene expression data. *Bioinformatics* **26**, 139–140  
821 (2010).
- 822 63. McCarthy, D. J., Chen, Y. & Smyth, G. K. Differential expression analysis of multifactor  
823 RNA-Seq experiments with respect to biological variation. *Nucleic Acids Research* **40**,  
824 4288–4297 (2012).
- 825 64. Chen, Y., Lun, A. T. L. & Smyth, G. K. From reads to genes to pathways: differential  
826 expression analysis of RNA-Seq experiments using Rsubread and the edgeR quasi-likelihood  
827 pipeline. *F1000Res* **5**, 1438 (2016).
- 828 65. Robinson, M. D. & Oshlack, A. A scaling normalization method for differential expression  
829 analysis of RNA-seq data. *Genome Biology* **11**, R25 (2010).
- 830 66. Lê, S., Josse, J. & Husson, F. FactoMineR : An R package for multivariate analysis. *Journal*  
831 *of Statistical Software* **25**, (2008).
- 832 67. Kassambara, A. & Mundt, F. *factoextra: Extract and Visualize the Results of Multivariate*  
833 *Data Analyses*. (2020).
- 834 68. Su, S. *et al.* Glimma: interactive graphics for gene expression analysis. *Bioinformatics* **33**,  
835 2050–2052 (2017).
- 836 69. Lun, A. T. L., Chen, Y. & Smyth, G. K. It’s DE-licious: A recipe for differential expression  
837 analyses of RNA-seq experiments using quasi-likelihood methods in edgeR. in *Statistical*  
838 *Genomics* (eds. Mathé, E. & Davis, S.) vol. 1418 391–416 (Springer New York, 2016).
- 839 70. Kvam, V. M., Liu, P. & Si, Y. A comparison of statistical methods for detecting  
840 differentially expressed genes from RNA-seq data. *American Journal of Botany* **99**, 248–256  
841 (2012).

- 842 71. Jawaid, W. *enrichR: Provides an R Interface to 'Enrichr'*. (2020).
- 843 72. Chen, E. Y. *et al.* Enrichr: interactive and collaborative HTML5 gene list enrichment  
844 analysis tool. *BMC Bioinformatics* **14**, 128 (2013).
- 845 73. Jeffries, K. M. *et al.* Divergent transcriptomic signatures in response to salinity exposure in  
846 two populations of an estuarine fish. *Evolutionary Application* **12**, 1212–1226 (2019).
- 847 74. Supek, F., Bošnjak, M., Škunca, N. & Šmuc, T. REVIGO summarizes and visualizes long  
848 lists of gene ontology terms. *PLOS ONE* **6**, e21800 (2011).
- 849 75. Wickham, H. *ggplot2: Elegant Graphics for Data Analysis*. (Springer International  
850 Publishing : Imprint: Springer, 2016). doi:10.1007/978-3-319-24277-4.
- 851
- 852

**Table 1:** Differentially expressed transcripts associated with phase I detoxification for sea lamprey larvae (*Petromyzon marinus*) and bluegill (*Lepomis macrochirus*) following 6, 12, and 24 h TFM (3-trifluoromethyl-4'-nitrophenol) exposure.

| Species            | Tissue | Exposure Duration (h) | Cluster ID          | UniProt Gene Name | FDR    | Fold Change |
|--------------------|--------|-----------------------|---------------------|-------------------|--------|-------------|
| <i>Sea Lamprey</i> | Gill   | 6                     | Cluster_41283.36015 | <i>cyp1a1</i>     | 0.041  | 5.06        |
|                    | Gill   | 6                     | Cluster_41283.41047 | <i>cyp1a1</i>     | 0.049  | 1.65        |
|                    | Gill   | 24                    | Cluster_41283.1293  | <i>cyp1b1</i>     | 0.002  | 2.57        |
|                    | Gill   | 24                    | Cluster_41283.2130  | <i>cyp1a5</i>     | <0.001 | 6.95        |
|                    | Gill   | 24                    | Cluster_41283.54788 | <i>cyp3a21</i>    | 0.003  | 1.46        |
|                    | Gill   | 24                    | Cluster_41283.54890 | <i>pon1</i>       | 0.033  | -1.19       |
|                    | Gill   | 24                    | Cluster_41283.8821  | <i>cyp2j2</i>     | <0.001 | -2.75       |
| <i>Bluegill</i>    | Gill   | 24                    | Cluster_41283.60437 | <i>cyp2d3</i>     | 0.001  | -2.01       |
|                    | Gill   | 6                     | Cluster_20758.1     | <i>cyp1b1</i>     | <0.001 | 11.57       |
|                    | Gill   | 6                     | Cluster_49386.0     | <i>cyp1b1</i>     | <0.001 | 16.23       |
|                    | Gill   | 6                     | Cluster_51425.1737  | <i>cyp1a1</i>     | <0.001 | 108.31      |
|                    | Gill   | 12                    | Cluster_20758.1     | <i>cyp1b1</i>     | <0.001 | 12.17       |
|                    | Gill   | 12                    | Cluster_49386.0     | <i>cyp1b1</i>     | <0.001 | 18.85       |
|                    | Gill   | 12                    | Cluster_51425.1737  | <i>cyp1a1</i>     | <0.001 | 117.16      |
|                    | Gill   | 24                    | Cluster_11231.2     | <i>mao</i>        | 0.011  | 1.347       |
|                    | Gill   | 24                    | Cluster_20758.1     | <i>cyp1b1</i>     | <0.001 | 18.37       |
|                    | Gill   | 24                    | Cluster_49386.0     | <i>cyp1b1</i>     | <0.001 | 40.30       |
|                    | Gill   | 24                    | Cluster_51425.1737  | <i>cyp1a1</i>     | <0.001 | 186.76      |
|                    | Liver  | 6                     | Cluster_51425.1737  | <i>cyp1a1</i>     | <0.001 | 6.42        |
|                    | Liver  | 12                    | Cluster_49386.0     | <i>cyp1b1</i>     | <0.001 | 12.93       |
| Liver              | 12     | Cluster_51425.10202   | <i>cyp2c31</i>      | 0.012             | 1.75   |             |
| Liver              | 12     | Cluster_51425.1737    | <i>cyp1a1</i>       | <0.001            | 12.80  |             |

|       |    |                     |                |        |       |
|-------|----|---------------------|----------------|--------|-------|
| Liver | 24 | Cluster_20758.1     | <i>cyp1b1</i>  | 0.044  | 2.14  |
| Liver | 24 | Cluster_49386.0     | <i>cyp1b1</i>  | <0.001 | 12.36 |
| Liver | 24 | Cluster_51425.10202 | <i>cyp2c31</i> | 0.003  | 1.78  |
| Liver | 24 | Cluster_51425.1737  | <i>cyp1a1</i>  | <0.001 | 11.63 |
| Liver | 24 | Cluster_51425.22684 | <i>cyp2k1</i>  | <0.001 | 2.46  |
| Liver | 24 | Cluster_51425.24180 | <i>cyp2k1</i>  | 0.027  | 2.56  |
| Liver | 24 | Cluster_51425.30529 | <i>cyp3a40</i> | <0.001 | 2.19  |
| Liver | 24 | Cluster_51425.31208 | <i>cyp2k1</i>  | 0.005  | 1.71  |
| Liver | 24 | Cluster_51425.36982 | <i>cyp2k1</i>  | <0.001 | 2.18  |
| Liver | 24 | Cluster_51425.6113  | <i>cyp2k6</i>  | 0.020  | 1.68  |
| Liver | 24 | Cluster_51425.29803 | <i>cyp2b2</i>  | 0.013  | -3.08 |
| Liver | 24 | Cluster_51425.38557 | <i>cyp2k1</i>  | 0.008  | -1.66 |
| Liver | 24 | Cluster_51425.7362  | <i>cyp2k6</i>  | 0.010  | -1.70 |
| Liver | 24 | Cluster_51425.38638 | <i>cyp2b4</i>  | 0.002  | 2.20  |

---

Transcripts were selected using UniProt descriptions where the enzyme was noted to be involved in xenobiotic and/or drug detoxification processes. FDR represents the false discovery rate of the pairwise contrasts and the fold change is against respective controls for a specific timepoint. A positive and negative fold change represents an upregulation or downregulation of the transcript relative to the control. Abbreviations for gene names are as follows: cytochrome P450 (*cyp*), monoamine oxidase (*mao*), and paraoxonase (*pon*).

**Table 2:** Identification of all UDP-glucuronosyltransferase (*ugt*) transcripts in the annotated transcriptomes of sea lamprey larvae (*Petromyzon marinus*) and bluegill (*Lepomis macrochirus*).

| Species            | Cluster ID          | UniProt Gene Name | Uniprot Entry ID | Expect Value (E)        | Percent ID (%) | Protein Name                     |
|--------------------|---------------------|-------------------|------------------|-------------------------|----------------|----------------------------------|
| <i>Sea lamprey</i> |                     |                   |                  |                         |                |                                  |
|                    | Cluster_41283.10908 | <i>ugt2c1</i>     | P36514           | 2.93x10 <sup>-24</sup>  | 62.50          | UDP-glucuronosyltransferase 2c1  |
|                    | Cluster_41283.12396 | <i>ugt2a1</i>     | P0DTE4           | 1.45x10 <sup>-86</sup>  | 36.96          | UDP-glucuronosyltransferase 2a1  |
|                    | Cluster_41283.4253  | <i>ugt2a2</i>     | Q6PDD0           | 2.35x10 <sup>-57</sup>  | 40.35          | UDP-glucuronosyltransferase 2a2  |
|                    | Cluster_41283.48705 | <i>ugt2a2</i>     | Q6PDD0           | 1.13x10 <sup>-24</sup>  | 56.99          | UDP-glucuronosyltransferase 2a2  |
|                    | Cluster_41283.5366  | <i>ugt2b1</i>     | P09875           | 3.84x10 <sup>-14</sup>  | 63.27          | UDP-glucuronosyltransferase 2b1  |
|                    | Cluster_41283.69509 | <i>ugt2a2</i>     | Q6PDD0           | 0.00                    | 51.15          | UDP-glucuronosyltransferase 2a2  |
| <i>Bluegill</i>    |                     |                   |                  |                         |                |                                  |
|                    | Cluster_21009.0     | <i>ugt3</i>       | Q91280           | 1.22x10 <sup>-28</sup>  | 41.61          | UDP-glucuronosyltransferase      |
|                    | Cluster_3692.0      | <i>ugt3a1</i>     | Q3UP75           | 3.36x10 <sup>-85</sup>  | 46.47          | UDP-glucuronosyltransferase 3a1  |
|                    | Cluster_51425.15463 | <i>ugt2a1</i>     | P0DTE4           | 1.56x10 <sup>-68</sup>  | 36.47          | UDP-glucuronosyltransferase 2a1  |
|                    | Cluster_51425.15468 | <i>ugt2a1</i>     | P0DTE4           | 1.67x10 <sup>-63</sup>  | 59.87          | UDP-glucuronosyltransferase 2a1  |
|                    | Cluster_51425.15474 | <i>ugt2a1</i>     | Q80X89           | 1.26x10 <sup>-110</sup> | 39.82          | UDP-glucuronosyltransferase 2a1  |
|                    | Cluster_51425.15477 | <i>ugt2b20</i>    | O77649           | 3.76x10 <sup>-53</sup>  | 53.57          | UDP-glucuronosyltransferase 2b20 |
|                    | Cluster_51425.15481 | <i>ugt2a1</i>     | P0DTE4           | 1.40x10 <sup>-62</sup>  | 59.63          | UDP-glucuronosyltransferase 2a1  |
|                    | Cluster_51425.17384 | <i>ugt3</i>       | Q91280           | 0.00                    | 67.26          | UDP-glucuronosyltransferase      |
|                    | Cluster_51425.25248 | <i>ugt2b9</i>     | O02663           | 2.49x10 <sup>-6</sup>   | 96.00          | UDP-glucuronosyltransferase 2b9  |
|                    | Cluster_51425.26320 | <i>ugt2a1</i>     | P0DTE4           | 1.15x10 <sup>-126</sup> | 38.21          | UDP-glucuronosyltransferase 2a1  |
|                    | Cluster_51425.32583 | <i>ugt1a5</i>     | Q64638           | 1.09x10 <sup>-7</sup>   | 50.00          | UDP-glucuronosyltransferase 1a5  |
|                    | Cluster_51425.33579 | <i>ugt2a1</i>     | P36510           | 0.00                    | 58.26          | UDP-glucuronosyltransferase 2a1  |

|                     |                |        |                         |       |                                     |
|---------------------|----------------|--------|-------------------------|-------|-------------------------------------|
| Cluster_51425.33985 | <i>ugt2b9</i>  | O02663 | $1.35 \times 10^{-14}$  | 39.13 | UDP-glucuronosyltransferase<br>2b9  |
| Cluster_51425.36243 | <i>ugt1a2</i>  | P20720 | $2.74 \times 10^{-124}$ | 42.06 | UDP-glucuronosyltransferase<br>1-2  |
| Cluster_51425.37011 | <i>ugt2a1</i>  | Q80X89 | $4.91 \times 10^{-132}$ | 42.56 | UDP-glucuronosyltransferase<br>2a1  |
| Cluster_51425.38640 | <i>ugt2b20</i> | O77649 | $1.39 \times 10^{-9}$   | 58.49 | UDP-glucuronosyltransferase<br>2b20 |
| Cluster_51425.5745  | <i>ugt2a1</i>  | PODTE4 | $1.09 \times 10^{-56}$  | 64.44 | UDP-glucuronosyltransferase<br>2a1  |

---



**Table 3:** Summary of the differentially expressed UDP-glucuronosyltransferase (UGT) transcripts for bluegill (*Lepomis macrochirus*) following 6, 12, and 24 h TFM (3-trifluoromethyl-4'-nitrophenol) exposure.

| Tissue | Exposure Duration (h) | Cluster ID          | UniProt Gene Name | FDR    | Fold Change |
|--------|-----------------------|---------------------|-------------------|--------|-------------|
| Gill   | 6                     | Cluster_51425.17384 | <i>ugt3</i>       | <0.001 | 5.69        |
| Gill   | 12                    | Cluster_51425.17384 | <i>ugt3</i>       | <0.001 | 11.22       |
| Gill   | 24                    | Cluster_51425.17384 | <i>ugt3</i>       | <0.001 | 15.88       |
| Liver  | 12                    | Cluster_51425.17384 | <i>ugt3</i>       | <0.001 | 13.06       |
| Liver  | 12                    | Cluster_51425.33985 | <i>ugt2b9</i>     | 0.003  | 1.79        |
| Liver  | 12                    | Cluster_51425.36243 | <i>ugt1a2</i>     | 0.004  | -1.90       |
| Liver  | 24                    | Cluster_21009.0     | <i>ugt3</i>       | 0.024  | 1.56        |
| Liver  | 24                    | Cluster_51425.17384 | <i>ugt3</i>       | <0.001 | 28.14       |
| Liver  | 24                    | Cluster_51425.33985 | <i>ugt2b9</i>     | <0.001 | 2.67        |
| Liver  | 24                    | Cluster_51425.15468 | <i>ugt2a1</i>     | <0.001 | -7.19       |
| Liver  | 24                    | Cluster_51425.15481 | <i>ugt2a1</i>     | 0.001  | -3.14       |
| Liver  | 24                    | Cluster_51425.32583 | <i>ugt1a5</i>     | 0.038  | -1.53       |
| Liver  | 24                    | Cluster_51425.36243 | <i>ugt1a2</i>     | <0.001 | -2.55       |

FDR represents the false discovery rate of the pairwise contrasts and the fold change is against respective controls for a specific timepoint. A positive and negative fold change represents an upregulation or downregulation of the transcript relative to the control.

**Table 4:** Differentially expressed transcripts associated with phase II detoxification for sea lamprey larvae (*Petromyzon marinus*) and bluegill (*Lepomis macrochirus*) following 6, 12, and 24 h TFM (3-trifluoromethyl-4'-nitrophenol) exposure.

| Species            | Tissue | Exposure Duration (h) | Cluster ID          | UniProt Gene Name | FDR    | Fold Change |
|--------------------|--------|-----------------------|---------------------|-------------------|--------|-------------|
| <i>Sea Lamprey</i> |        |                       |                     |                   |        |             |
|                    | Gill   | 24                    | Cluster_41283.24751 | <i>gstt3</i>      | <0.001 | 2.26        |
|                    | Gill   | 24                    | Cluster_41283.69009 | <i>sult6b1</i>    | <0.001 | 2.29        |
|                    | Liver  | 24                    | Cluster_41283.18986 | <i>nnmt</i>       | 0.026  | -1.76       |
| <i>Bluegill</i>    |        |                       |                     |                   |        |             |
|                    | Gill   | 6                     | Cluster_51425.33237 | <i>sult6b1</i>    | 0.006  | 1.54        |
|                    | Gill   | 12                    | Cluster_3656.0      | <i>nat8</i>       | 0.005  | 2.07        |
|                    | Gill   | 12                    | Cluster_51425.33237 | <i>sult6b1</i>    | <0.001 | 2.19        |
|                    | Gill   | 12                    | Cluster_52314.5     | <i>tpmt</i>       | 0.032  | -1.30       |
|                    | Gill   | 24                    | Cluster_51425.10275 | <i>sult1st2</i>   | 0.025  | 1.29        |
|                    | Gill   | 24                    | Cluster_51425.33237 | <i>sult6b1</i>    | <0.001 | 3.81        |
|                    | Gill   | 24                    | Cluster_36463.1     | <i>nat2</i>       | 0.026  | -1.57       |
|                    | Liver  | 24                    | Cluster_36463.1     | <i>nat2</i>       | 0.022  | 1.70        |
|                    | Liver  | 24                    | Cluster_3656.0      | <i>nat8</i>       | <0.001 | 2.34        |
|                    | Liver  | 24                    | Cluster_51425.35293 | <i>gstt3</i>      | 0.048  | -1.37       |
|                    | Liver  | 24                    | Cluster_51425.6836  | <i>sult1c1</i>    | <0.001 | -1.63       |
|                    | Liver  | 24                    | Cluster_52314.5     | <i>tpmt</i>       | <0.001 | -1.81       |
|                    | Liver  | 24                    | Cluster_7193.0      | <i>gstt1</i>      | 0.019  | -1.70       |

Transcripts were selected using UniProt descriptions where the enzyme was noted to be involved in xenobiotic and/or drug detoxification processes. Transcripts excluded UDP-glucuronosyltransferases (see Table 3). FDR represents the false discovery rate of the pairwise contrasts and the fold change is against respective controls for a specific timepoint. A positive and negative fold change represents an upregulation or downregulation of the transcript relative to the control. Abbreviations for gene names are as follows: Glutathione S-transferase (*gstt*), sulfotransferase (*sult*), N-acetyltransferase (*nat*), nicotinamide N-methyltransferase (*nnmt*), and thiopurine S-methyltransferase (*tpmt*).

**Table 5:** Differentially expressed transcripts associated with phase III detoxification for sea lamprey larvae (*Petromyzon marinus*) and bluegill (*Lepomis macrochirus*) following 6, 12, and 24 h TFM (3-trifluoromethyl-4'-nitrophenol) exposure.

| Species            | Tissue | Exposure Duration (h) | Cluster ID          | UniProt Gene Name | FDR    | Fold Change |
|--------------------|--------|-----------------------|---------------------|-------------------|--------|-------------|
| <i>Sea Lamprey</i> |        |                       |                     |                   |        |             |
|                    | Gill   | 24                    | Cluster_34003.4     | <i>abcc3</i>      | 0.008  | 1.55        |
|                    | Gill   | 24                    | Cluster_41283.10772 | <i>abcc5</i>      | <0.001 | 1.95        |
|                    | Gill   | 24                    | Cluster_41283.22177 | <i>abcb1</i>      | <0.001 | 5.56        |
|                    | Gill   | 24                    | Cluster_41283.58441 | <i>abcb11</i>     | <0.001 | 4.31        |
|                    | Gill   | 24                    | Cluster_41283.61313 | <i>abcb1</i>      | <0.001 | 4.95        |
|                    | Gill   | 24                    | Cluster_41283.62778 | <i>slc7a5</i>     | <0.001 | 1.73        |
|                    | Gill   | 24                    | Cluster_41283.9558  | <i>abcg2</i>      | <0.001 | 2.90        |
|                    | Gill   | 24                    | Cluster_41283.1906  | <i>slc35d2</i>    | <0.001 | -1.50       |
|                    | Gill   | 24                    | Cluster_41283.24514 | <i>slc22a15b</i>  | 0.014  | -1.38       |
|                    | Liver  | 24                    | Cluster_41283.10772 | <i>abcc5</i>      | 0.017  | 2.34        |
|                    | Liver  | 24                    | Cluster_41283.69161 | <i>slc35a3</i>    | 0.016  | -2.10       |
| <i>Bluegill</i>    |        |                       |                     |                   |        |             |
|                    | Gill   | 6                     | Cluster_49443.0     | <i>slco3a1</i>    | 0.012  | -1.30       |
|                    | Gill   | 12                    | Cluster_50801.0     | <i>slc29a3</i>    | 0.011  | 1.23        |
|                    | Gill   | 12                    | Cluster_51425.13125 | <i>slco2b1</i>    | 0.033  | 1.31        |
|                    | Gill   | 12                    | Cluster_51425.24527 | <i>slc35d1</i>    | 0.046  | 1.19        |
|                    | Gill   | 12                    | Cluster_51425.35543 | <i>slc7a8</i>     | 0.046  | 1.32        |
|                    | Gill   | 12                    | Cluster_51425.4852  | <i>slc35a3</i>    | 0.002  | 1.32        |
|                    | Gill   | 12                    | Cluster_47743.0     | <i>slc35d2</i>    | 0.034  | -1.25       |
|                    | Gill   | 12                    | Cluster_49443.0     | <i>slco3a1</i>    | 0.004  | -1.24       |
|                    | Gill   | 24                    | Cluster_1028.4      | <i>abca3</i>      | <0.001 | 1.65        |
|                    | Gill   | 24                    | Cluster_10382.9     | <i>abcc4</i>      | 0.039  | 1.23        |
|                    | Gill   | 24                    | Cluster_38275.4     | <i>slc22a15b</i>  | 0.032  | 1.16        |

|       |    |                     |                  |        |       |
|-------|----|---------------------|------------------|--------|-------|
| Gill  | 24 | Cluster_50801.0     | <i>slc29a3</i>   | <0.001 | 1.49  |
| Gill  | 24 | Cluster_51425.13125 | <i>slco2b1</i>   | 0.007  | 1.46  |
| Gill  | 24 | Cluster_51425.3133  | <i>slc17a5</i>   | 0.006  | 1.21  |
| Gill  | 24 | Cluster_51425.4852  | <i>slc35a3</i>   | <0.001 | 1.68  |
| Gill  | 24 | Cluster_52136.2     | <i>abcb6</i>     | <0.001 | 1.44  |
| Gill  | 24 | Cluster_47743.0     | <i>slc35d2</i>   | 0.001  | -1.47 |
| Gill  | 24 | Cluster_49443.0     | <i>slco3a1</i>   | 0.026  | -1.22 |
| Gill  | 24 | Cluster_51425.1412  | <i>abcb1</i>     | 0.022  | -1.70 |
| Liver | 12 | Cluster_43105.2     | <i>slc17a5</i>   | 0.005  | 1.44  |
| Liver | 12 | Cluster_51425.33972 | <i>slc7a5</i>    | 0.027  | 1.58  |
| Liver | 12 | Cluster_51425.35543 | <i>slc7a8</i>    | 0.014  | 1.83  |
| Liver | 12 | Cluster_52136.2     | <i>abcb6</i>     | 0.001  | 2.66  |
| Liver | 24 | Cluster_38275.4     | <i>slc22a15b</i> | <0.001 | 1.56  |
| Liver | 24 | Cluster_43105.2     | <i>slc17a5</i>   | <0.001 | 1.98  |
| Liver | 24 | Cluster_51425.3133  | <i>slc17a5</i>   | 0.022  | 1.21  |
| Liver | 24 | Cluster_51425.33972 | <i>slc7a5</i>    | <0.001 | 1.88  |
| Liver | 24 | Cluster_51425.4852  | <i>slc35a3</i>   | 0.037  | 1.52  |
| Liver | 24 | Cluster_52136.2     | <i>abcb6</i>     | <0.001 | 2.70  |
| Liver | 24 | Cluster_17571.3     | <i>slc47a1</i>   | 0.002  | -1.70 |
| Liver | 24 | Cluster_51425.13125 | <i>slco2b1</i>   | 0.002  | -1.87 |

---

Transcripts were selected using UniProt descriptions where the enzyme was noted to be involved in xenobiotic and/or drug detoxification processes as well as those capable of transporting conjugate molecules for glucuronidation. FDR represents the false discovery rate of the pairwise contrasts and the fold change is against respective controls for a specific timepoint. A positive and negative fold change represents an upregulation or downregulation of the transcript relative to the control. Abbreviations for gene names are as follows: ATP-binding cassette transporter (*abc*) and solute carrier (*slc*).

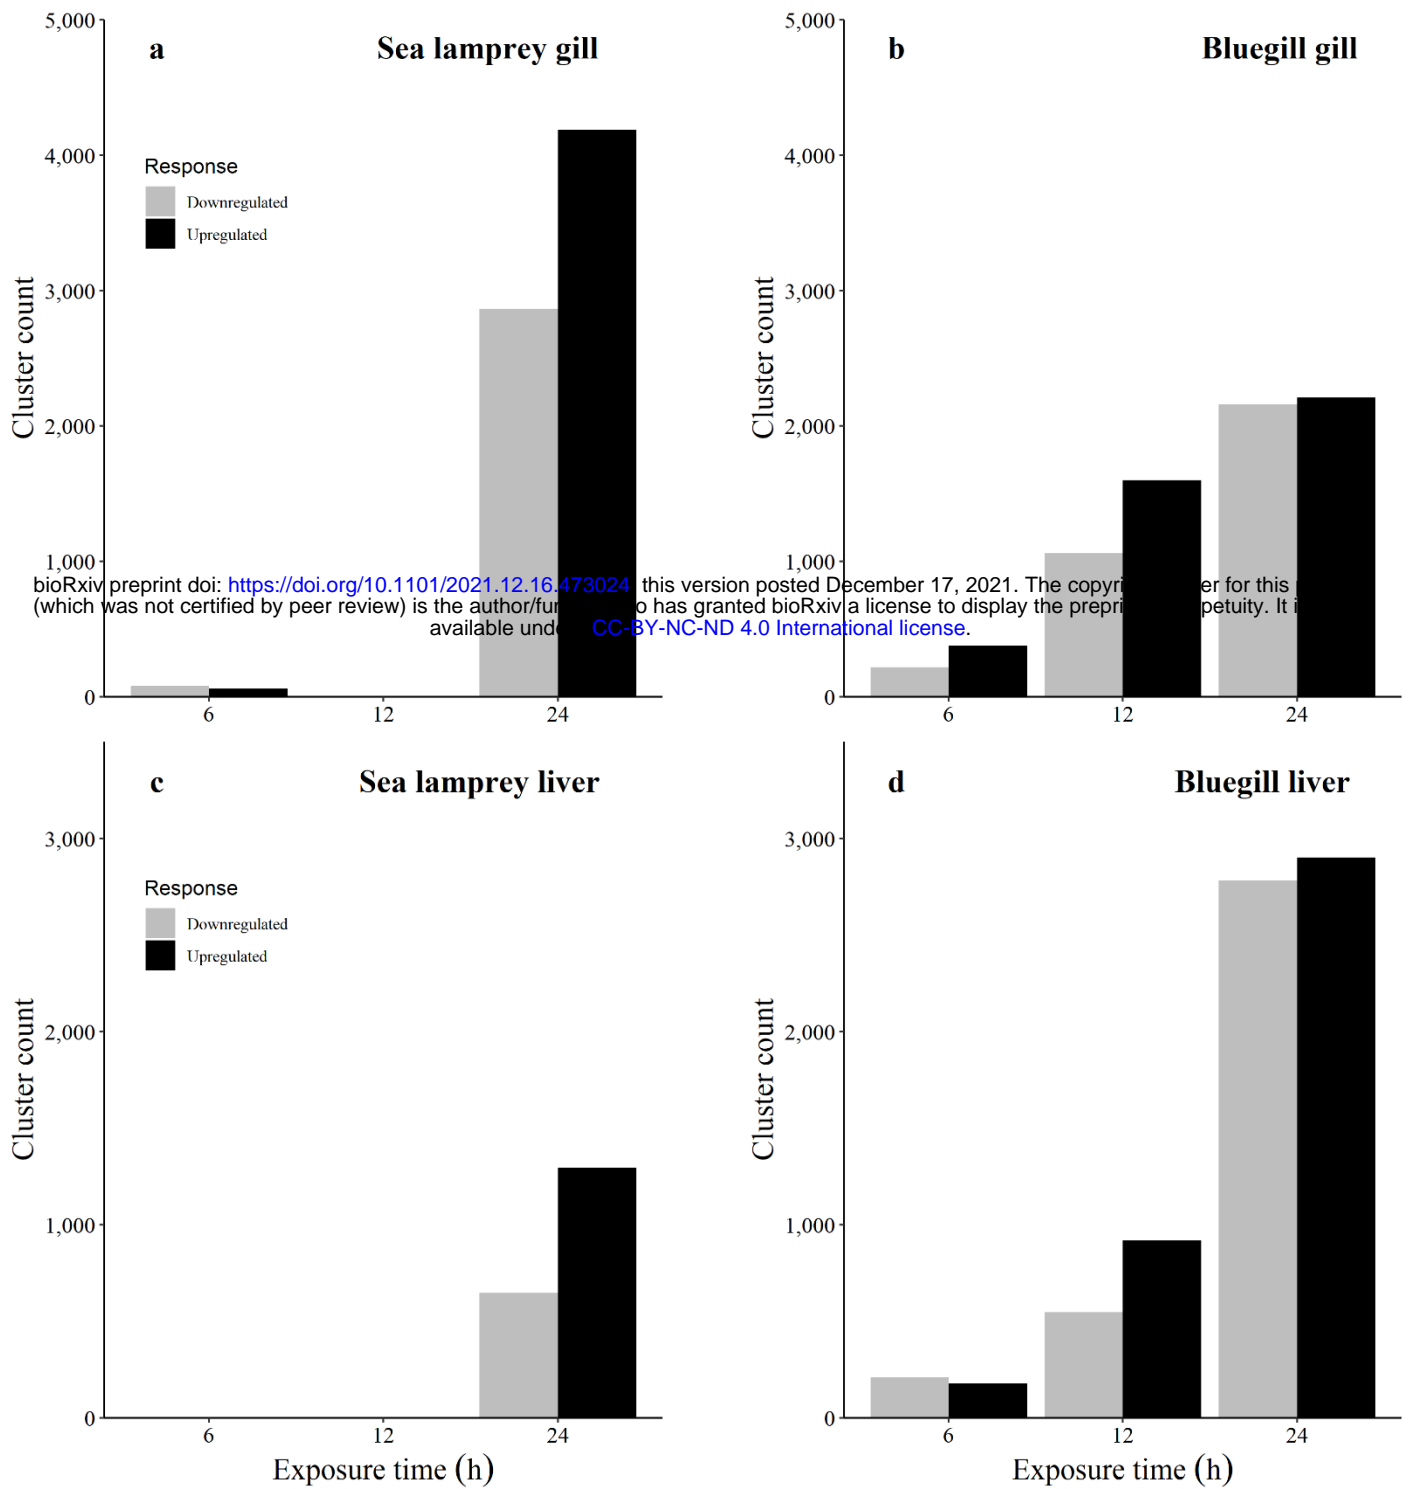

24

25 **Figure 1:** Total counts of differentially expressed superTranscriptome clusters in the gills (a,b)  
 26 and liver (c,d) of sea lamprey larvae and bluegill following a 24 h TFM exposure. Grey bars  
 27 represent differentially expressed clusters that were downregulated whereas black bars represent  
 28 upregulated clusters. All clusters were deemed to be significant at a false discovery rate (FDR) of  
 29  $\alpha = 0.05$ .

30

31

32

33

34

35

36

37

38

39

40

41

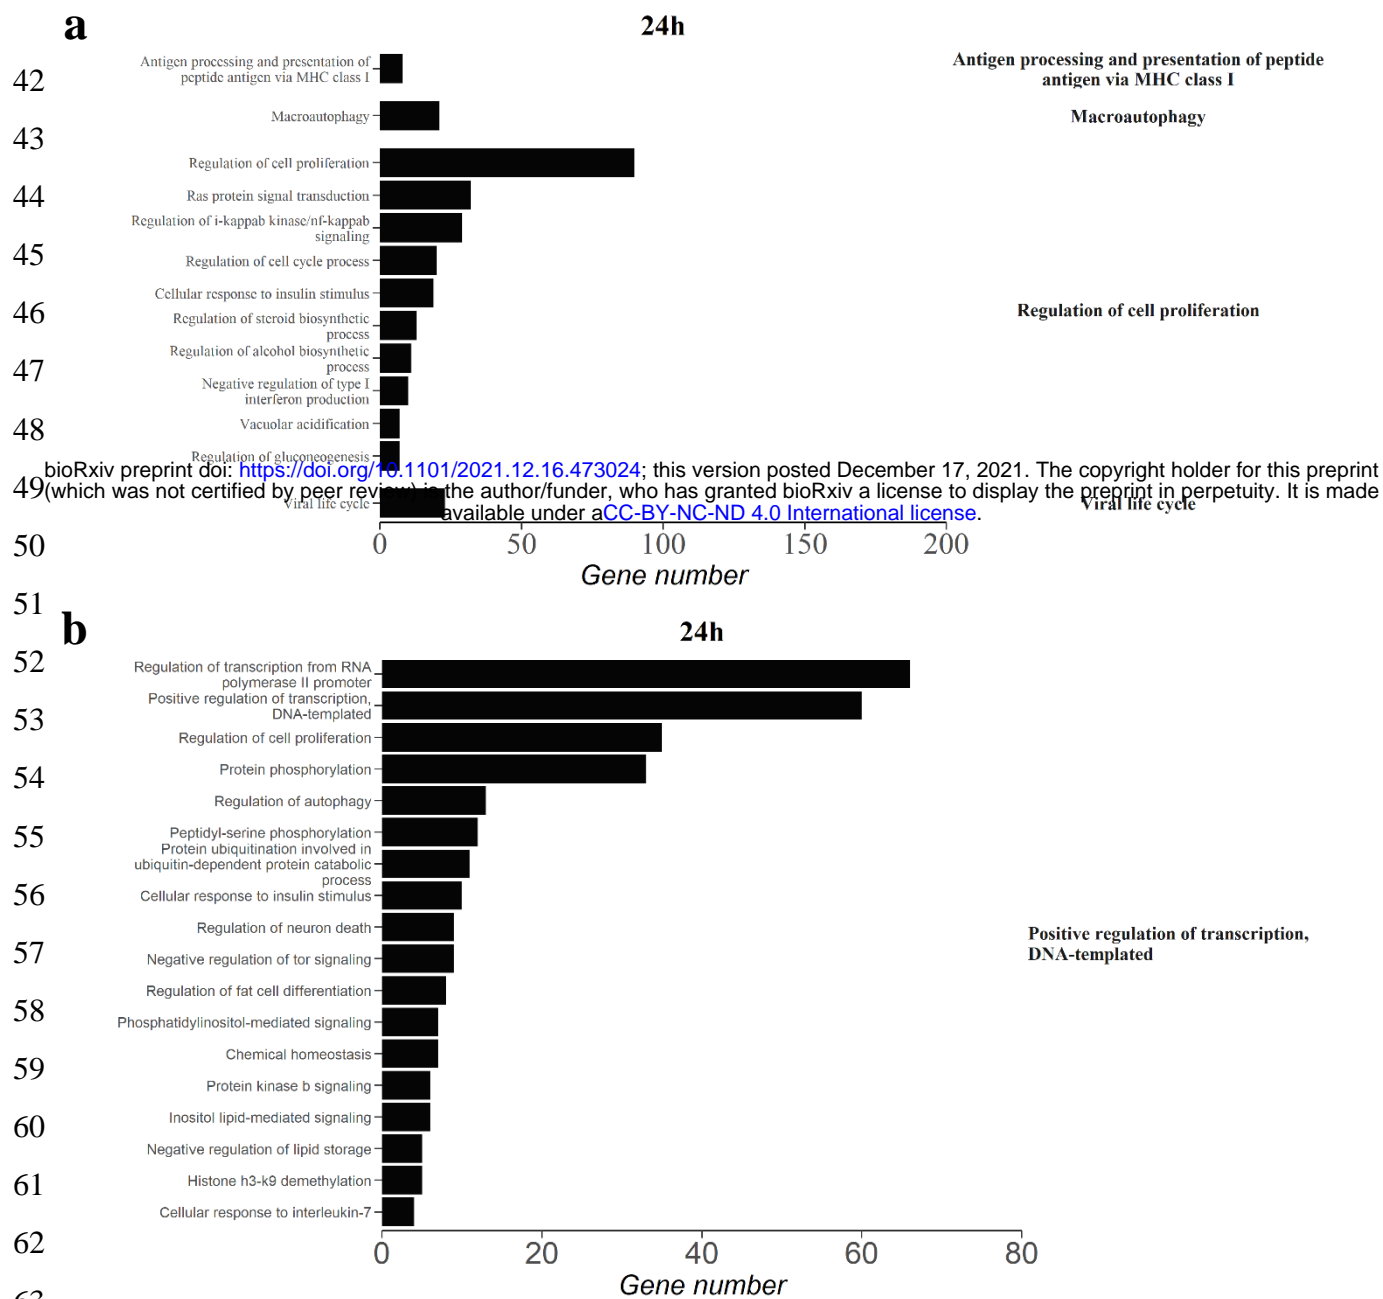

**Figure 2:** Summary of enriched gene ontology (GO) terms with transcripts that were upregulated following 24 h of TFM (3-trifluoromethyl-4'-nitrophenol; 2.21 mg L<sup>-1</sup> nominal) exposure in the gills (a) and liver (b) of sea lamprey (*Petromyzon marinus*) larvae. Transcripts were considered differentially regulated at a false discovery rate < 0.05. Only GO terms from the functional analysis with an adjusted p < 0.05 and at least four transcripts were considered significantly enriched. REVIGO was used to summarize GO terms to reduce redundancy and group according to similarity (right labels).

71  
72  
73  
74  
75  
76  
77  
78  
79  
80  
81  
82  
83

**a**

**6h**

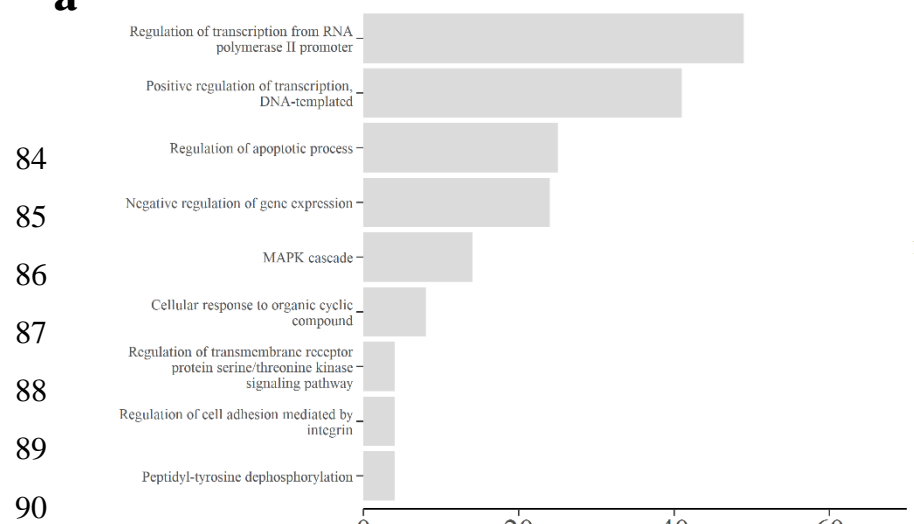

**Regulation of transcription from RNA polymerase II promoter**

bioRxiv preprint doi: <https://doi.org/10.1101/2021.12.16.473024>; this version posted December 17, 2021. The copyright holder for this preprint (which was not certified by peer review) is the author/funder, who has granted bioRxiv a license to display the preprint in perpetuity. It is made available under aCC-BY-NC-ND 4.0 International license.

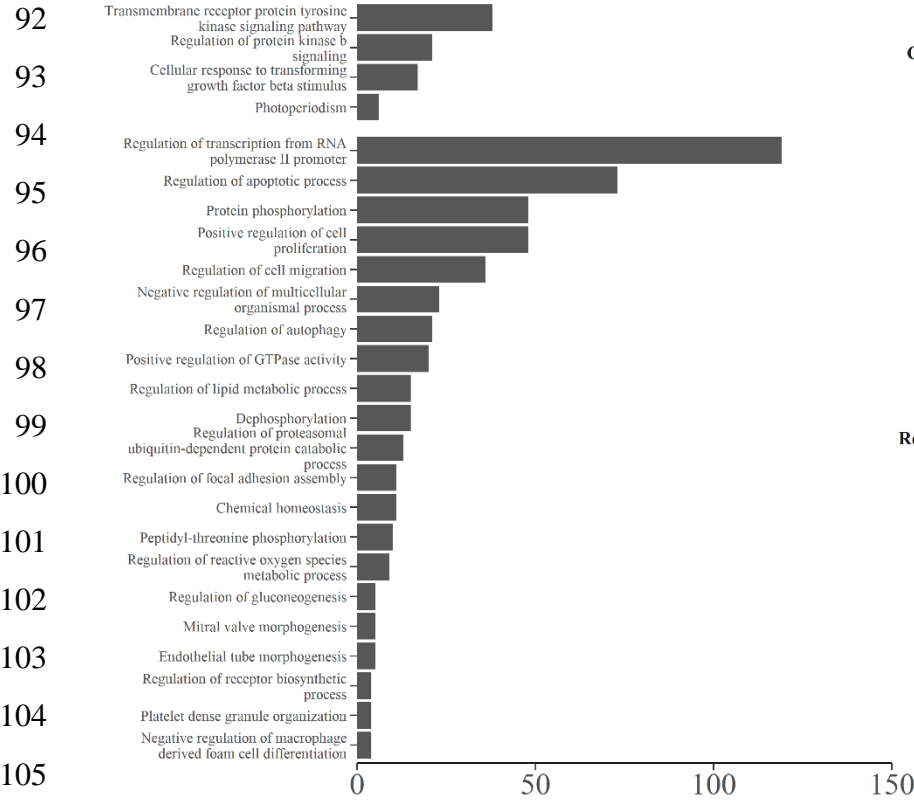

**Cellular response to transforming growth factor beta stimulus**

**Regulation of transcription from RNA polymerase II promoter**

**24h**

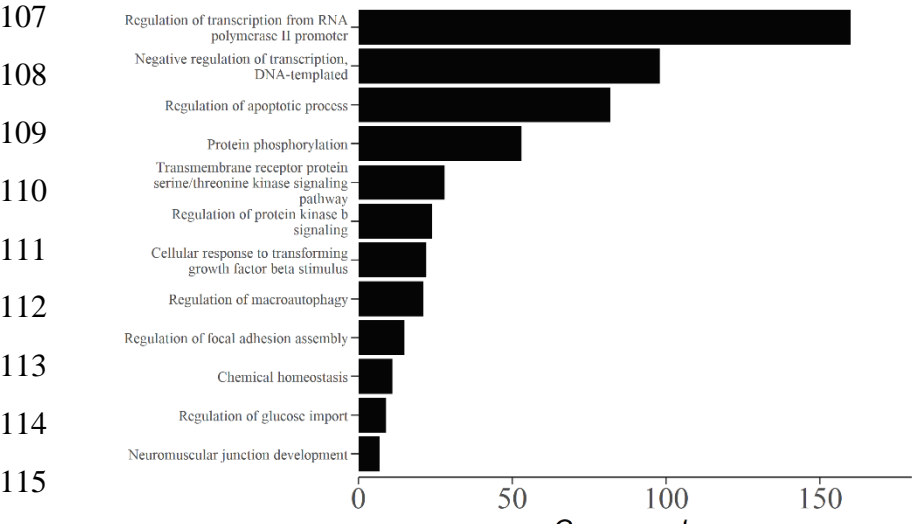

**Regulation of transcription from RNA polymerase II promoter**

*Gene number*

116  
117  
118  
119  
120  
121  
122  
123

**b****6h**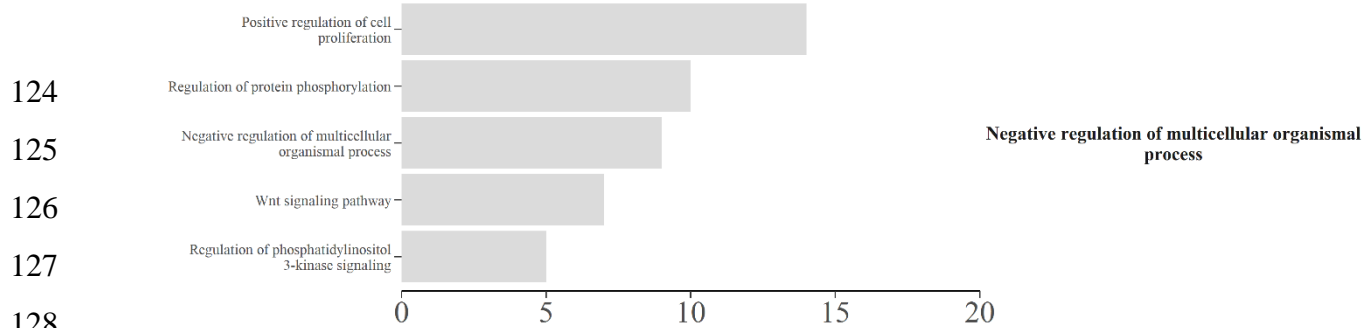**12h**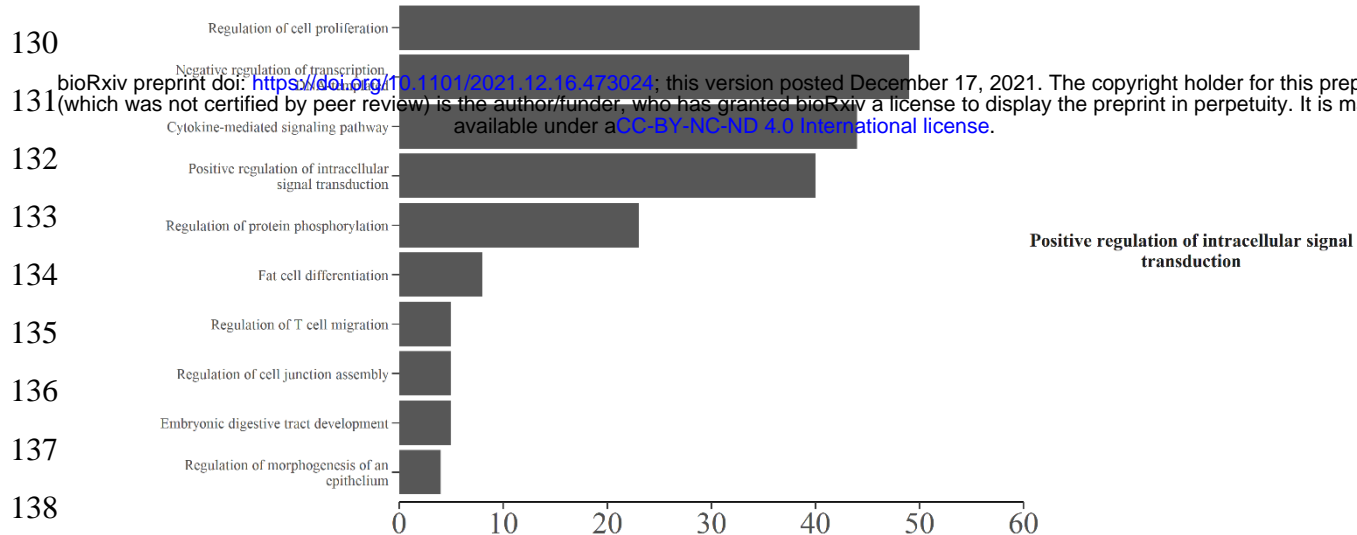**24h**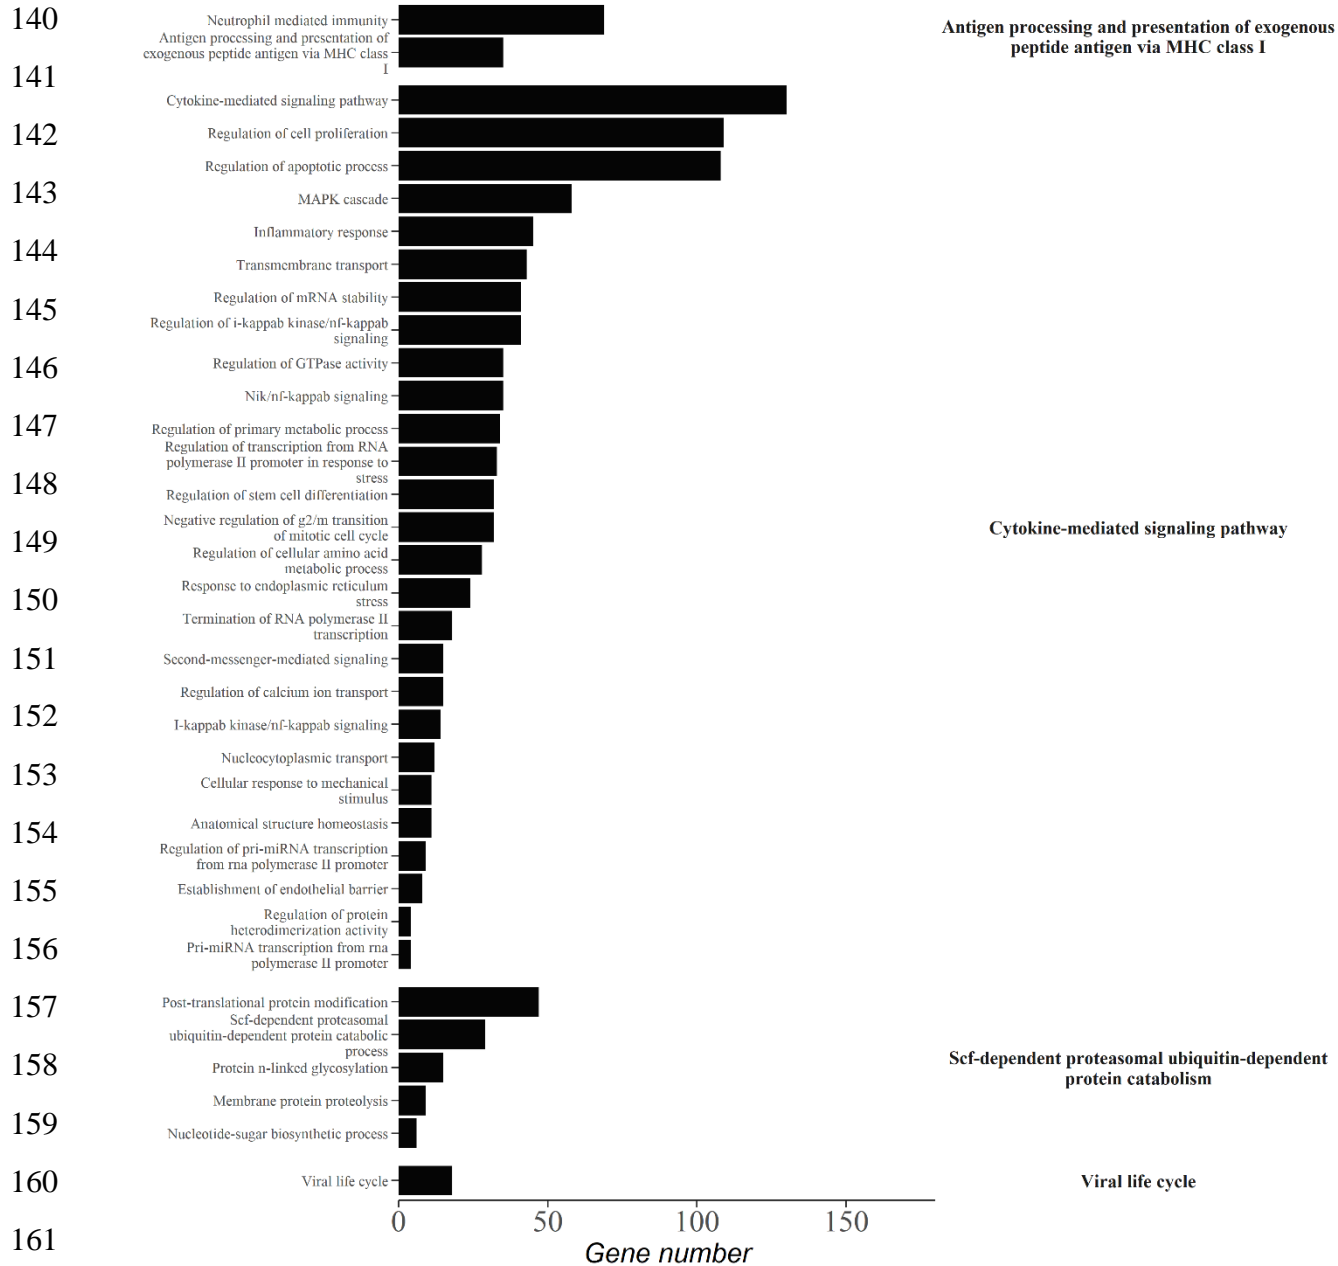

Gene number



164 **Figure 3:** Summary of enriched gene ontology (GO) terms with transcripts that were upregulated  
165 (a) and downregulated (b) following 6 h (light grey), 12 h (dark grey), and 24 h (black) of TFM  
166 (3-trifluoromethyl-4'-nitrophenol; 22.06 mg L<sup>-1</sup> nominal) exposure in the gills of bluegill  
167 (*Lepomis macrochirus*). Transcripts were considered differentially regulated at a false discovery  
168 rate < 0.05. Only GO terms from the functional analysis with an adjusted p < 0.05 and at least  
169 four transcripts were considered significantly enriched. REVIGO was used to summarize GO  
170 terms to reduce redundancy and group according to similarity (right labels).

171

172

173 bioRxiv preprint doi: <https://doi.org/10.1101/2021.12.16.473024>; this version posted December 17, 2021. The copyright holder for this preprint  
(which was not certified by peer review) is the author/funder, who has granted bioRxiv a license to display the preprint in perpetuity. It is made  
available under a [CC-BY-NC-ND 4.0 International license](#).

174

175

176

177

178

179

180

181

182

183

184

185

186

187

188

189

190

191

192

193

194

195

196

197

198

199

200

201

202

203

204

205

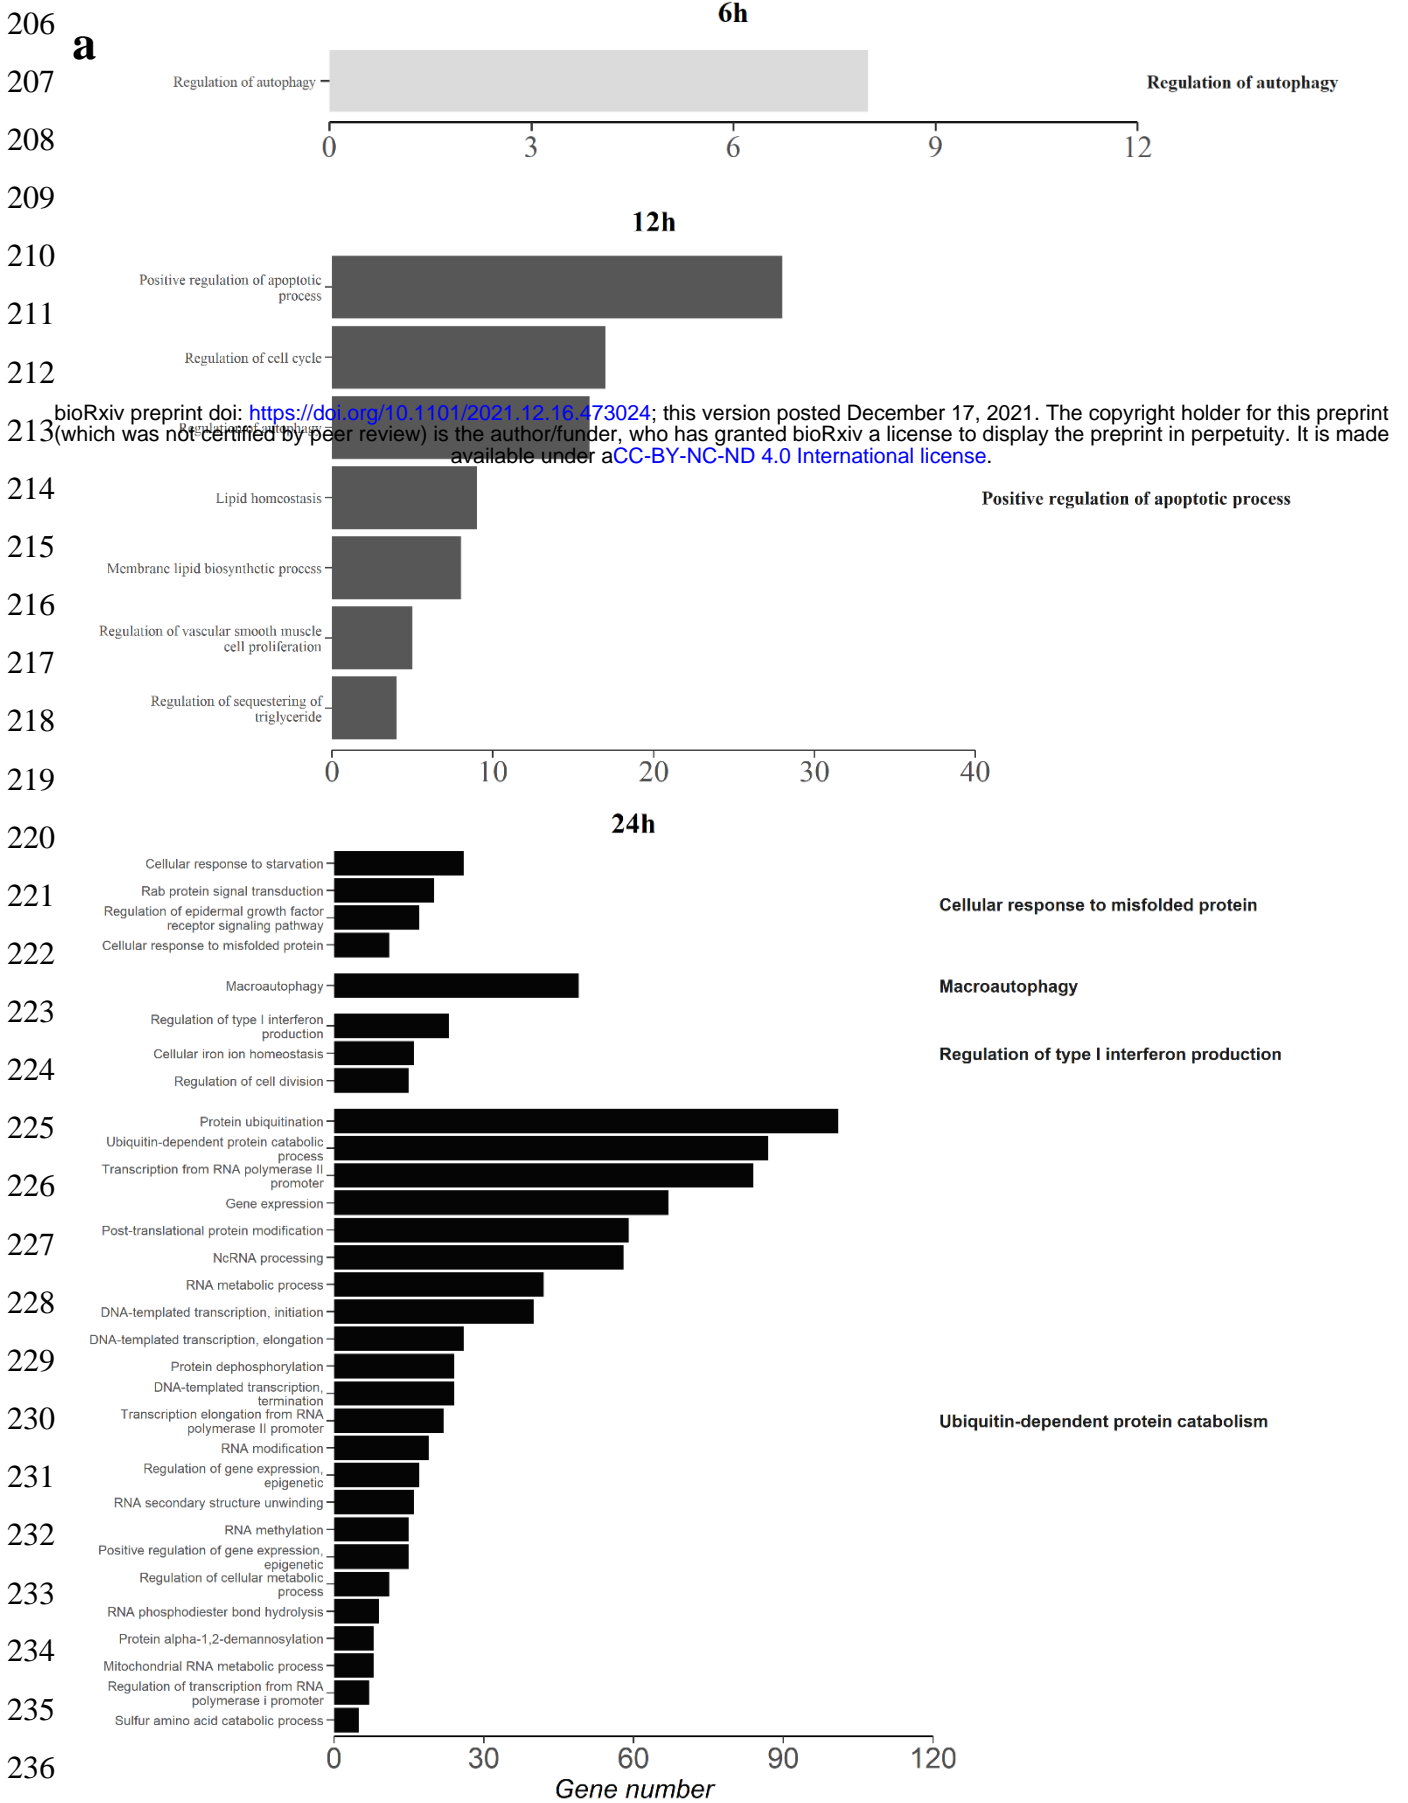

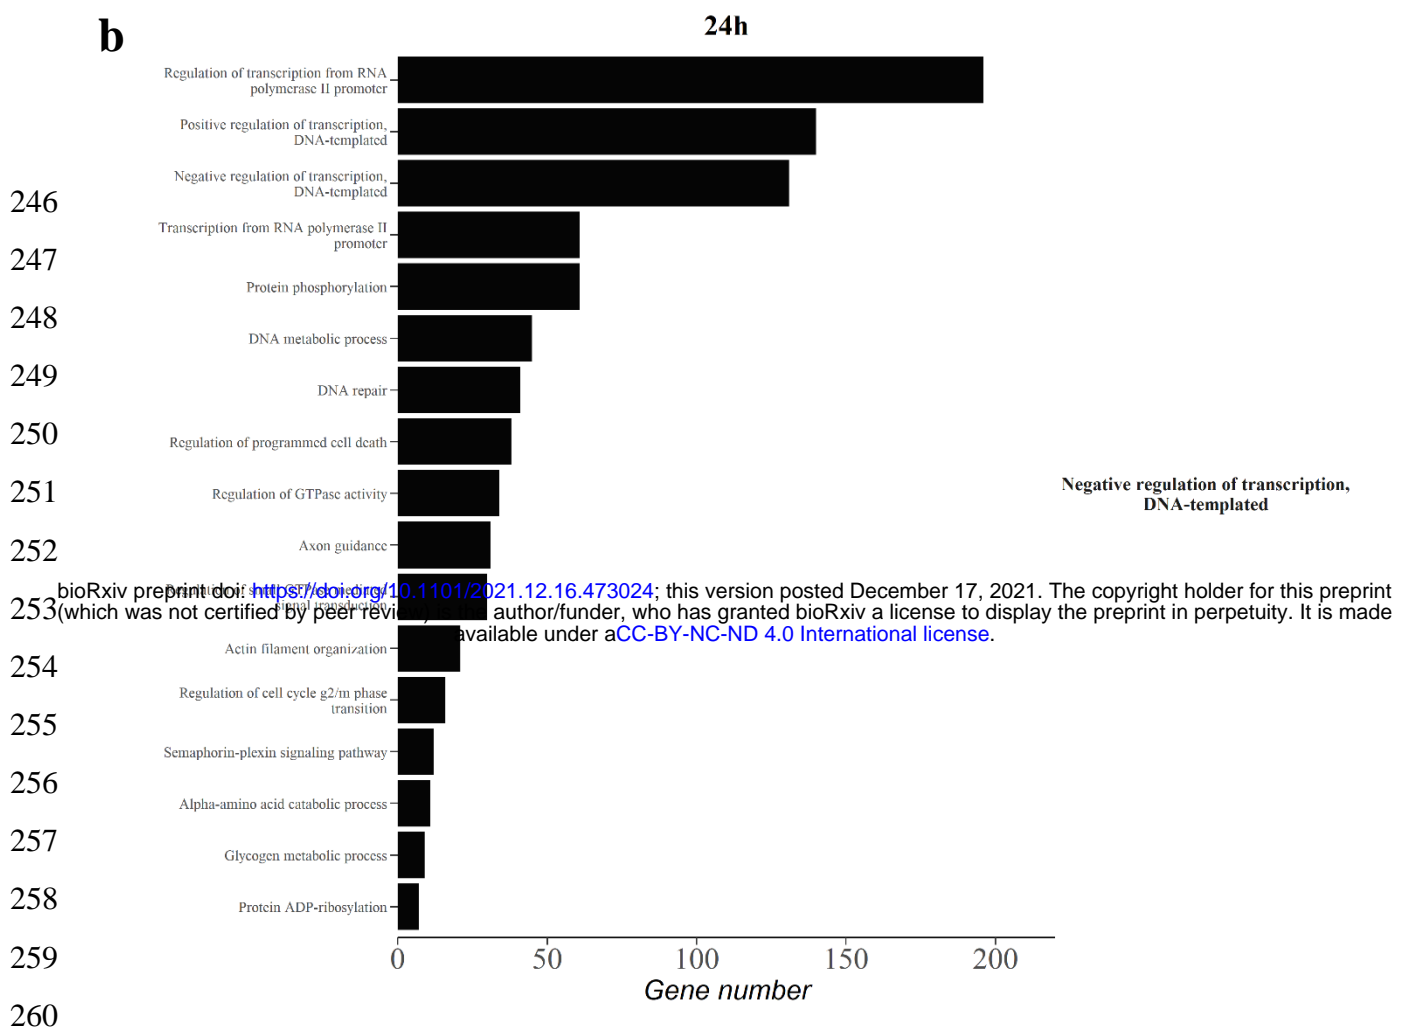

**Figure 4:** Summary of enriched gene ontology (GO) terms with transcripts that were upregulated (a) and downregulated (b) following 6 h (light grey), 12 h (dark grey) and 24 h (black) of TFM (3-trifluoromethyl-4'-nitrophenol; 22.06 mg L<sup>-1</sup> nominal) exposure in the liver of bluegill (*Lepomis macrochirus*). Transcripts were considered differentially regulated at a false discovery rate < 0.05. Only GO terms from the functional analysis with an adjusted p < 0.05 and at least four transcripts were considered significantly enriched. REVIGO was used to summarize GO terms to reduce redundancy and group according to similarity (right labels).

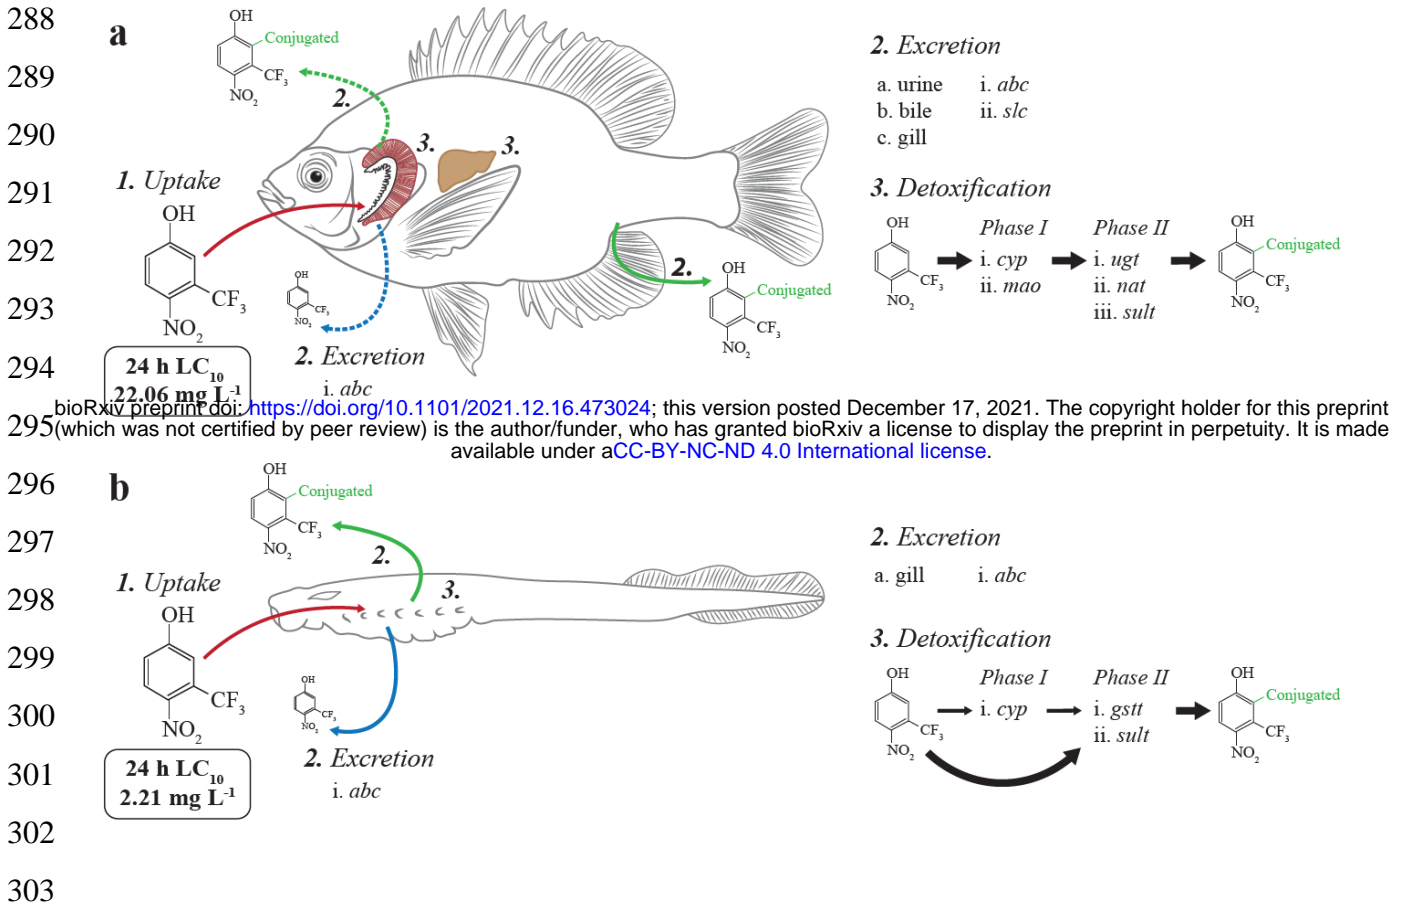

304 **Figure 5:** Overview of the pathways of TFM (3-trifluoromethyl-4'-nitrophenol) uptake,  
305 excretion, biotransformation, and elimination in bluegill (*Lepomis macrochirus*; **a**) and sea  
306 lamprey larvae (*Petromyzon marinus*; **b**). Detoxification transcripts that are presented here were  
307 found to have higher differential expression following exposure to TFM (bluegill = 22.06 mg L<sup>-1</sup>  
308 <sup>1</sup>, lamprey = 2.21 mg L<sup>-1</sup>) over a 24 h period.

1

2 **Table S1:** Total sequencing reads counts by species and tissue.

| <b>Species</b> | <b>Tissue</b> | <b>Total Reads</b>   |
|----------------|---------------|----------------------|
| Sea lamprey    | Gill          | 1.73x10 <sup>9</sup> |
|                | Liver         | 1.19x10 <sup>9</sup> |
| Bluegill       | Gill          | 1.59x10 <sup>9</sup> |
|                | Liver         | 1.81x10 <sup>9</sup> |

3

4

5

6

7

8

9

10

11

12

13

14

15

16

17

18

19

20

21

22

23

24

25 **Table S2.** BUSCO reports comparing the initial Trinity assembly to the Corset-Lace assembly

| <b>Species</b>         | <b>Assembly</b> | <b>Complete<br/>BUSCOs<br/>(C) = S+D</b> | <b>Complete<br/>Single-Copy<br/>BUSCOs (S)</b> | <b>Complete<br/>duplicated<br/>BUSCOs (D)</b> | <b>Fragmented<br/>BUSCOs (F)</b> | <b>Missing<br/>BUSCOs (M)</b> |
|------------------------|-----------------|------------------------------------------|------------------------------------------------|-----------------------------------------------|----------------------------------|-------------------------------|
| <i>Bluegill</i>        | Trinity         | 98.4%                                    | 39.6%                                          | 58.8%                                         | 0.4%                             | 1.2%                          |
|                        | Corset/Lace     | 84.7%                                    | 82.0%                                          | 2.7%                                          | 9.4%                             | 5.9%                          |
| <i>Sea<br/>lamprey</i> | Trinity         | 96.1%                                    | 35.7%                                          | 60.4%                                         | 2.4%                             | 1.5%                          |
|                        | Corset/Lace     | 91%                                      | 87.5%                                          | 3.5%                                          | 6.3%                             | 2.7%                          |

26

27

28

29

30

31

32

33

34

35

36

37

38  
39  
40  
41  
42  
43  
44  
45  
46  
47  
48  
49  
50  
51  
52  
53  
54  
55  
56  
57  
58  
59  
60  
61  
62  
63  
64  
65  
66  
67  
68

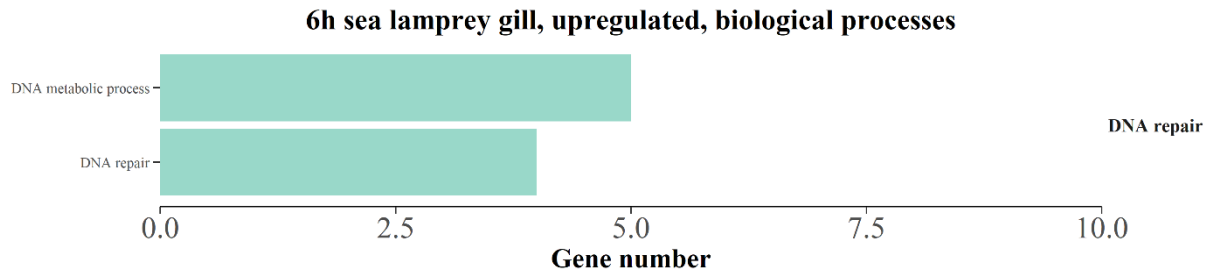

**Figure S1:** Summary of enriched gene ontology (GO) terms associated with biological processes in transcripts that were upregulated following 6 h of TFM (3-trifluoromethyl-4'-nitrophenol; 2.21 mg L<sup>-1</sup> nominal) exposure in the gills of sea lamprey (*Petromyzon marinus*) larvae. Transcripts were considered differentially regulated at a false discovery rate < 0.05. Only GO terms from the functional analysis with an adjusted p < 0.05 and at least four transcripts were considered significantly enriched. REVIGO was used to summarize GO terms to reduce redundancy and group according to similarity (right labels).



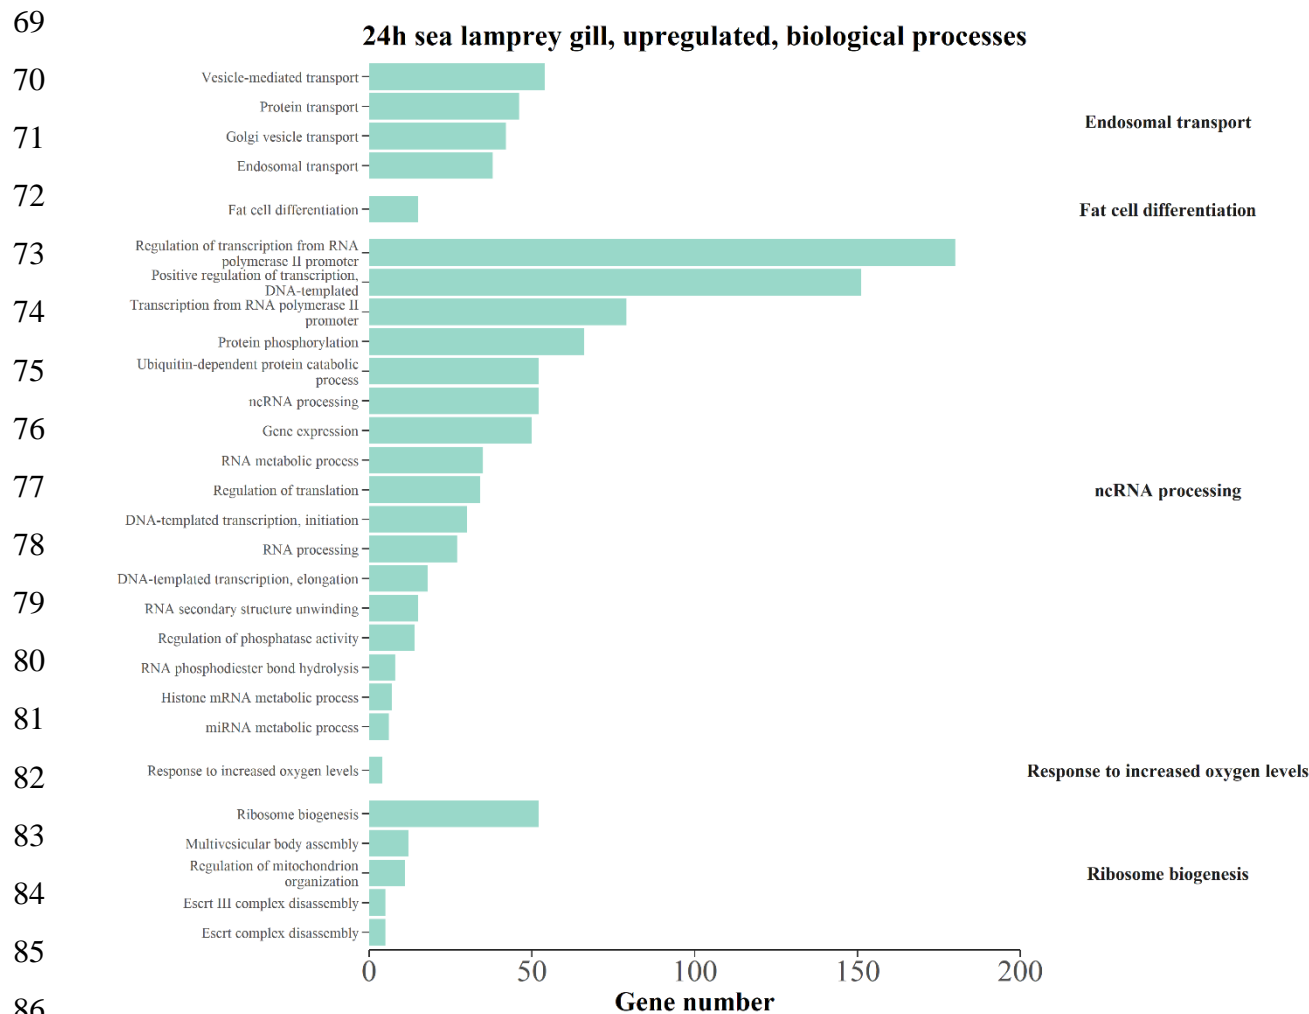

87 **Figure S2:** Summary of enriched gene ontology (GO) terms associated with biological processes  
 88 in transcripts that were upregulated following 24 h of TFM (3-trifluoromethyl-4'-nitrophenol;  
 89 2.21 mg L<sup>-1</sup> nominal) exposure in the gills of sea lamprey (*Petromyzon marinus*) larvae.  
 90 Transcripts were considered differentially regulated at a false discovery rate < 0.05. Only GO  
 91 terms from the functional analysis with an adjusted p < 0.05 and at least four transcripts were  
 92 considered significantly enriched. REVIGO was used to summarize GO terms to reduce  
 93 redundancy and group according to similarity (right labels).

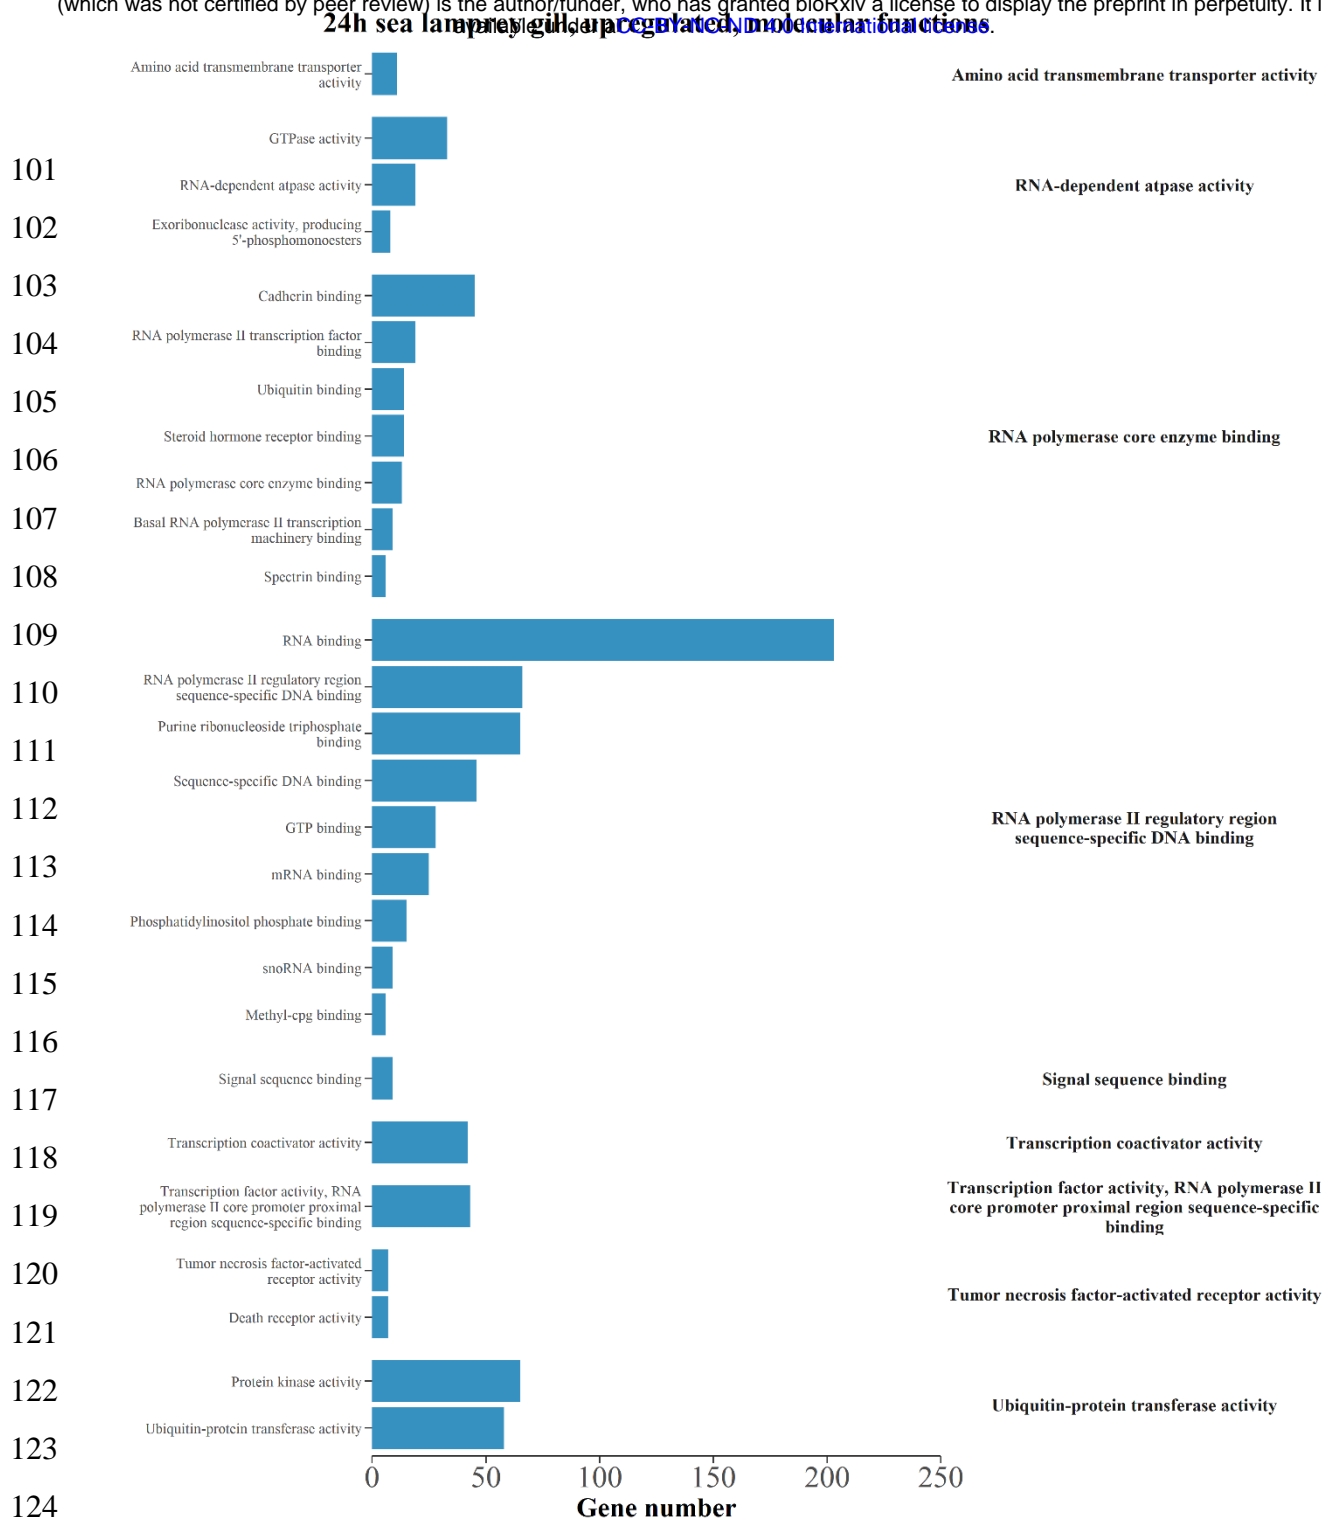

**Figure S3:** Summary of enriched gene ontology (GO) terms associated with molecular functions in transcripts that were upregulated following 24 h of TFM (3-trifluoromethyl-4'-nitrophenol; 2.21 mg L<sup>-1</sup> nominal) exposure in the gills of sea lamprey (*Petromyzon marinus*) larvae. Transcripts were considered differentially regulated at a false discovery rate < 0.05. Only GO terms from the functional analysis with an adjusted p < 0.05 and at least four transcripts were considered significantly enriched. REVIGO was used to summarize GO terms to reduce redundancy and group according to similarity (right labels).

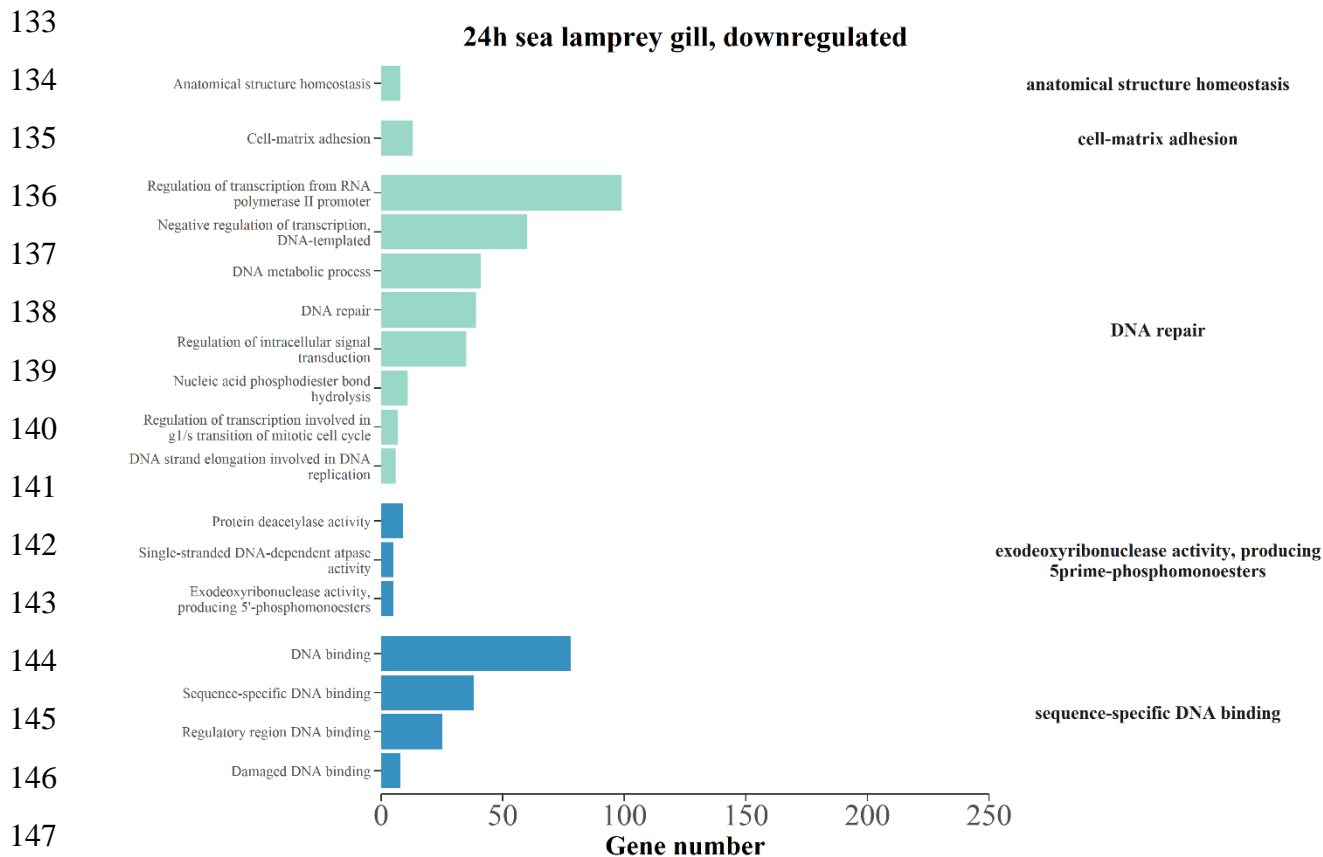

149 **Figure S4:** Summary of enriched gene ontology (GO) terms associated with biological processes  
 150 (green) and molecular functions (blue) in transcripts that were downregulated following 24 h of  
 151 TFM (3-trifluoromethyl-4'-nitrophenol; 2.21 mg L<sup>-1</sup> nominal) exposure in the gills of sea  
 152 lamprey (*Petromyzon marinus*) larvae. Transcripts were considered differentially regulated at a  
 153 false discovery rate < 0.05. Only GO terms from the functional analysis with an adjusted p <  
 154 0.05 and at least four transcripts were considered significantly enriched. REVIGO was used to  
 155 summarize GO terms to reduce redundancy and group according to similarity (right labels).

156  
 157  
 158  
 159  
 160  
 161  
 162  
 163  
 164

165  
166  
167  
168  
169  
170  
171  
172  
173  
174  
175  
176  
177  
178  
179  
180  
181  
182  
183  
184  
185  
186  
187  
188  
189  
190  
191  
192  
193  
194  
195  
196

### 24h sea lamprey liver, upregulated, molecular functions

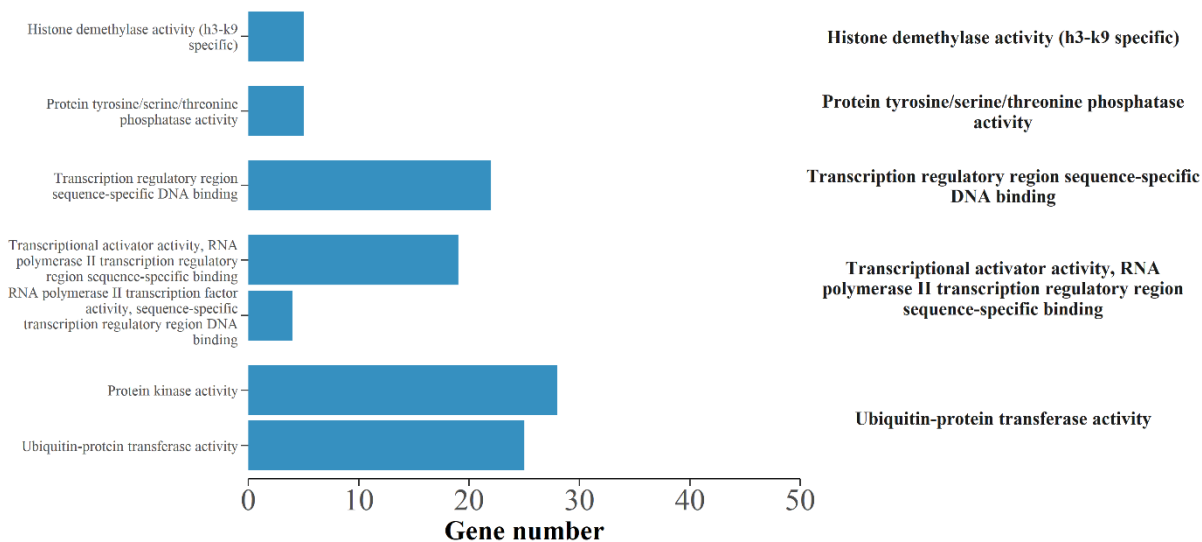

**Figure S5:** Summary of enriched gene ontology (GO) terms associated with molecular functions in transcripts that were upregulated following 24 h of TFM (3-trifluoromethyl-4'-nitrophenol; 2.21 mg L<sup>-1</sup> nominal) exposure in the liver of sea lamprey (*Petromyzon marinus*) larvae. Transcripts were considered differentially regulated at a false discovery rate < 0.05. Only GO terms from the functional analysis with an adjusted p < 0.05 and at least four transcripts were considered significantly enriched. REVIGO was used to summarize GO terms to reduce redundancy and group according to similarity (right labels).

197

### 24h sea lamprey liver, downregulated, biological processes

198

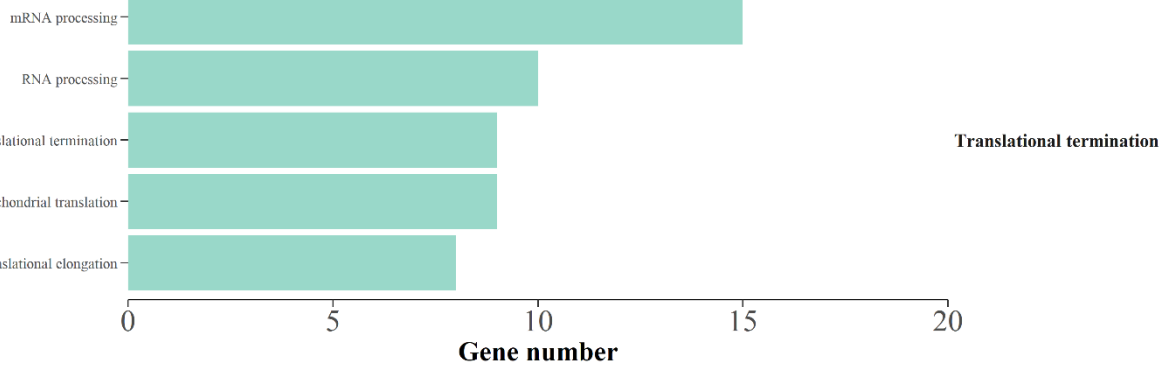

199

200

201

202

203

204

205

206 **Figure S6:** Summary of enriched gene ontology (GO) terms associated with biological processes  
207 in transcripts that were downregulated following 24 h of TFM (3-trifluoromethyl-4'-nitrophenol;  
208 2.21 mg L<sup>-1</sup> nominal) exposure in the liver of sea lamprey (*Petromyzon marinus*) larvae.  
209 Transcripts were considered differentially regulated at a false discovery rate < 0.05. Only GO  
210 terms from the functional analysis with an adjusted p < 0.05 and at least four transcripts were  
211 considered significantly enriched. REVIGO was used to summarize GO terms to reduce  
212 redundancy and group according to similarity (right labels).

213

214

215

216

217

218

219

220

221

222

223

224

225

226

227

228

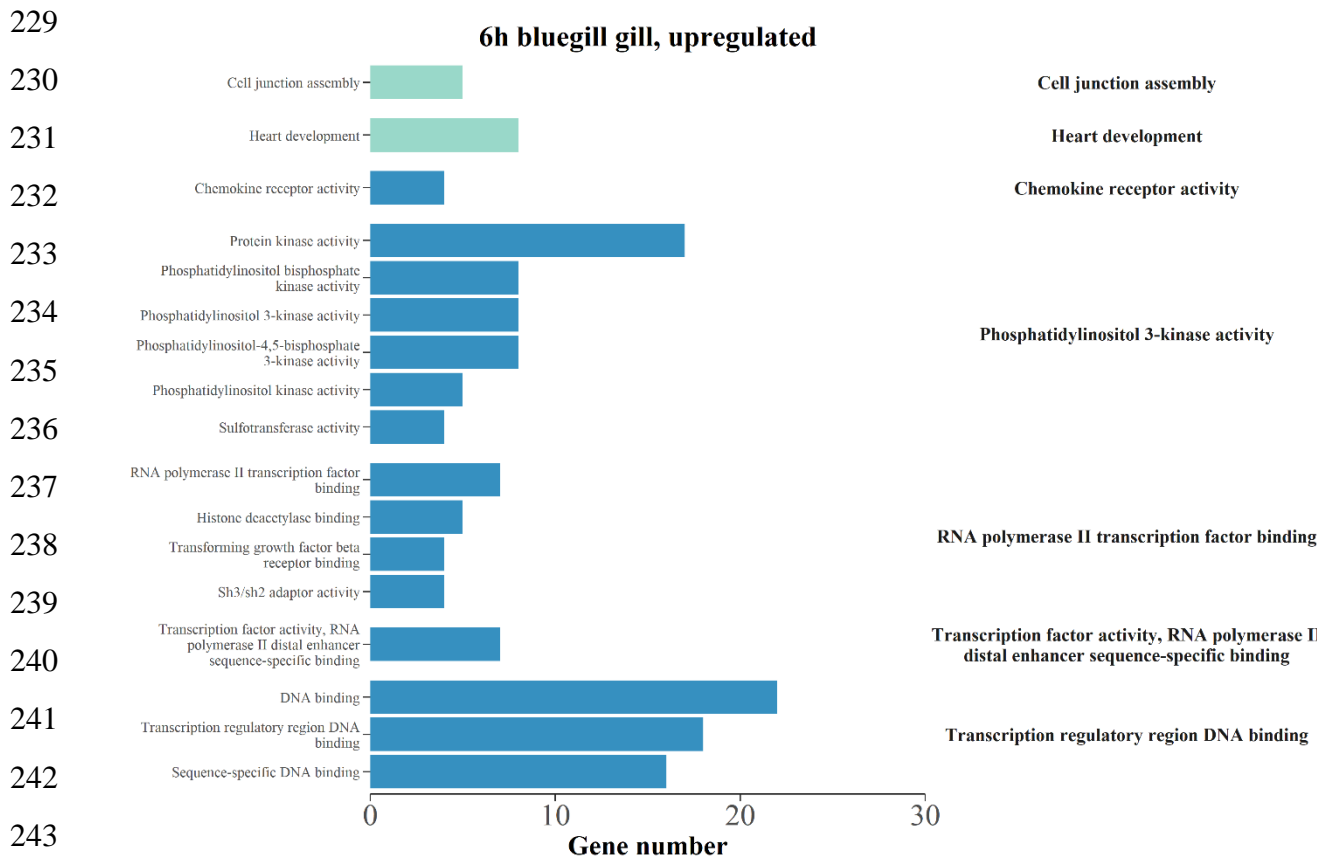

244

245 **Figure S7:** Summary of enriched gene ontology (GO) terms associated with biological processes

246 (green) and molecular functions (blue) in transcripts that were upregulated following 6 h of TFM

247 (3-trifluoromethyl-4'-nitrophenol; 22.06 mg L<sup>-1</sup> nominal) exposure in the gills of bluegill

248 (*Lepomis macrochirus*). Transcripts were considered differentially regulated at a false discovery

249 rate < 0.05. Only GO terms from the functional analysis with an adjusted p < 0.05 and at least

250 four transcripts were considered significantly enriched. REVIGO was used to summarize GO

251 terms to reduce redundancy and group according to similarity (right labels).

252

253

254

255

256

257

258

259

260

261  
262  
263  
264  
265  
266  
267  
268  
269  
270  
271  
272  
273  
274  
275  
276  
277  
278  
279  
280  
281  
282  
283  
284  
285  
286  
287  
288  
289  
290  
291  
292

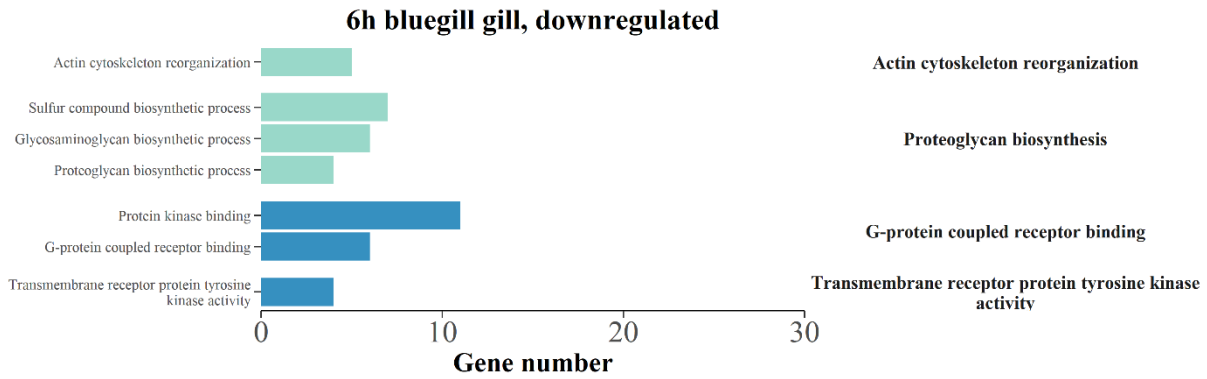

**Figure S8:** Summary of enriched gene ontology (GO) terms associated with biological processes (green) and molecular functions (blue) in transcripts that were downregulated following 6 h of TFM (3-trifluoromethyl-4'-nitrophenol; 22.06 mg L<sup>-1</sup> nominal) exposure in the gills of bluegill (*Lepomis macrochirus*). Transcripts were considered differentially regulated at a false discovery rate < 0.05. Only GO terms from the functional analysis with an adjusted p < 0.05 and at least four transcripts were considered significantly enriched. REVIGO was used to summarize GO terms to reduce redundancy and group according to similarity (right labels).



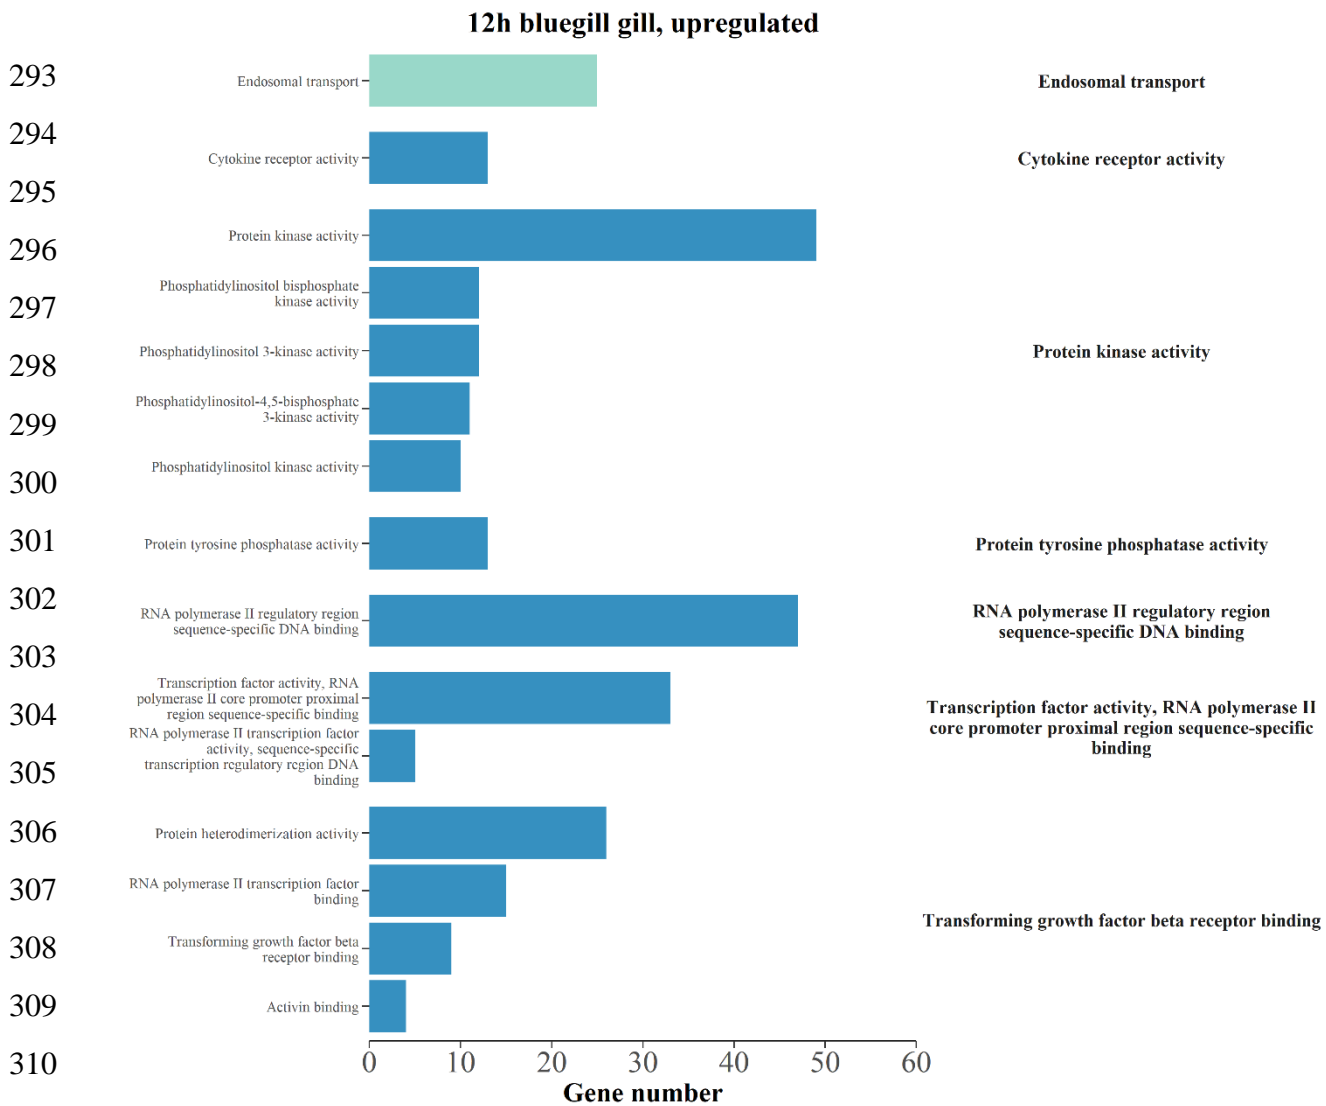

311  
 312 **Figure S9:** Summary of enriched gene ontology (GO) terms associated with biological processes  
 313 (green) and molecular functions (blue) in transcripts that were upregulated following 12 h of  
 314 TFM (3-trifluoromethyl-4'-nitrophenol; 22.06 mg L<sup>-1</sup> nominal) exposure in the gills of bluegill  
 315 (*Lepomis macrochirus*). Transcripts were considered differentially regulated at a false discovery  
 316 rate < 0.05. Only GO terms from the functional analysis with an adjusted p < 0.05 and at least  
 317 four transcripts were considered significantly enriched. REVIGO was used to summarize GO  
 318 terms to reduce redundancy and group according to similarity (right labels).

319

320

321

322

323

324

325  
326  
327  
328  
329  
330  
331  
332  
333  
334  
335  
336  
337  
338  
339  
340  
341  
342  
343  
344  
345  
346  
347  
348  
349  
350  
351  
352  
353  
354  
355  
356

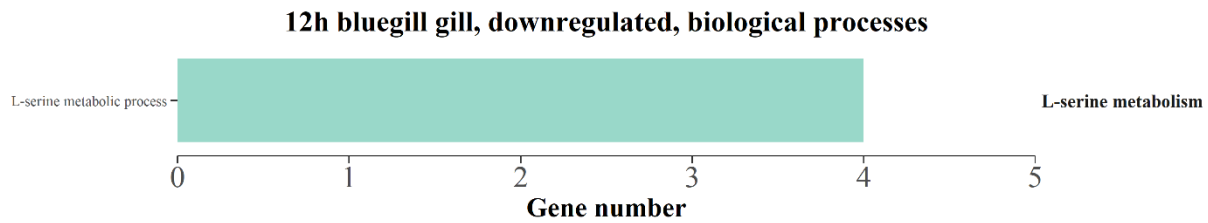

**Figure S10:** Summary of enriched gene ontology (GO) terms associated with biological processes in transcripts that were downregulated following 12 h of TFM (3-trifluoromethyl-4'-nitrophenol; 22.06 mg L<sup>-1</sup> nominal) exposure in the gills of bluegill (*Lepomis macrochirus*). Transcripts were considered differentially regulated at a false discovery rate < 0.05. Only GO terms from the functional analysis with an adjusted p < 0.05 and at least four transcripts were considered significantly enriched. REVIGO was used to summarize GO terms to reduce redundancy and group according to similarity (right labels).

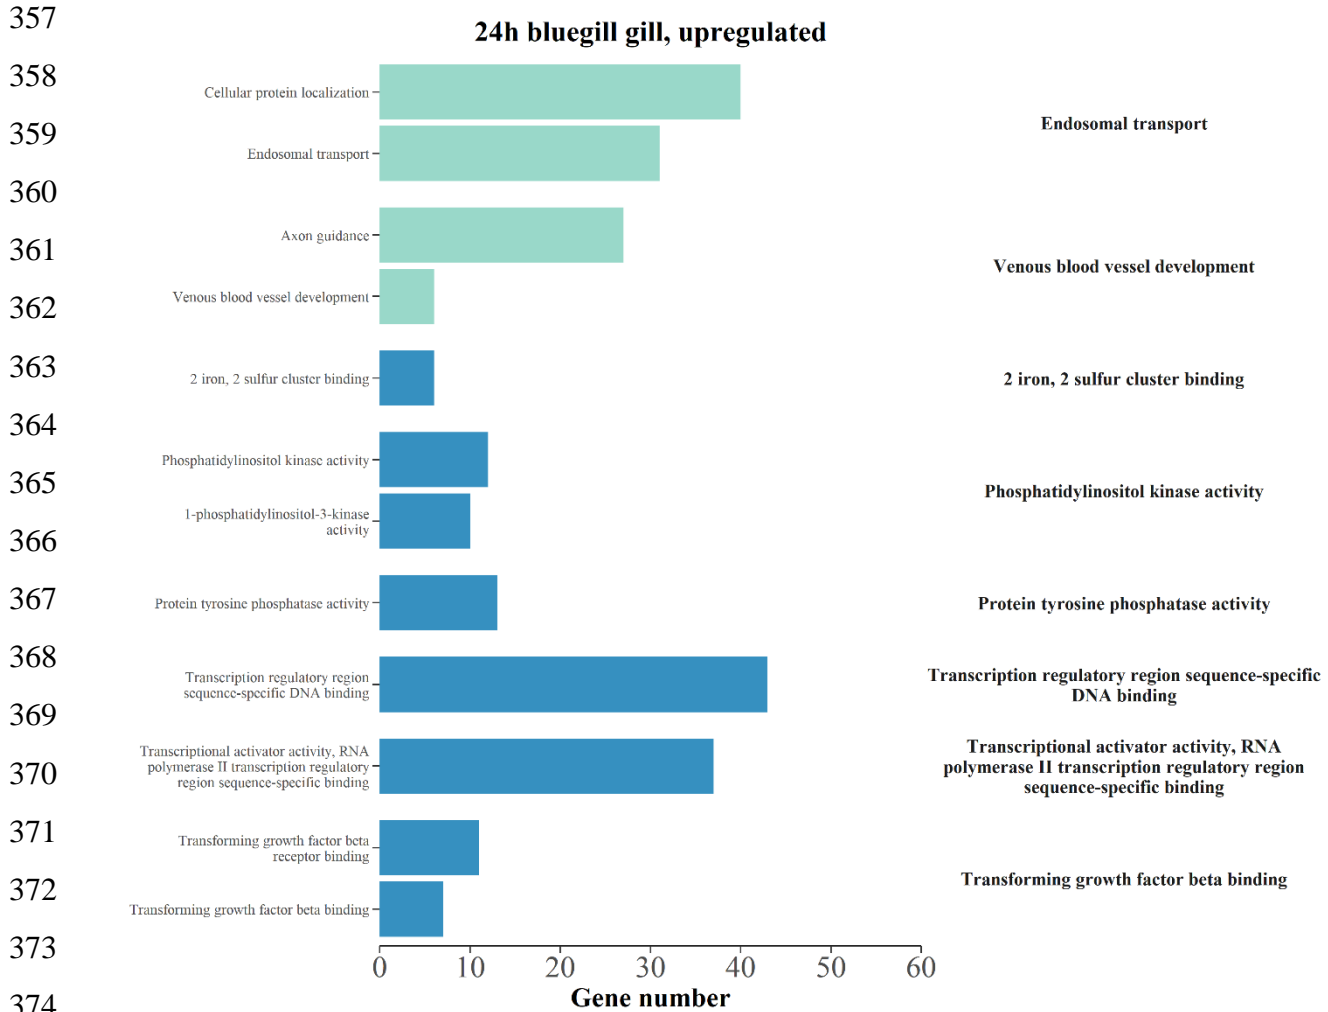

376 **Figure S11:** Summary of enriched gene ontology (GO) terms associated with biological  
 377 processes (green) and molecular functions (blue) in transcripts that were upregulated following  
 378 24 h of TFM (3-trifluoromethyl-4'-nitrophenol; 22.06 mg L<sup>-1</sup> nominal) exposure in the gills of  
 379 bluegill (*Lepomis macrochirus*). Transcripts were considered differentially regulated at a false  
 380 discovery rate < 0.05. Only GO terms from the functional analysis with an adjusted p < 0.05 and  
 381 at least four transcripts were considered significantly enriched. REVIGO was used to summarize  
 382 GO terms to reduce redundancy and group according to similarity (right labels).

383

384

385

386

387

388

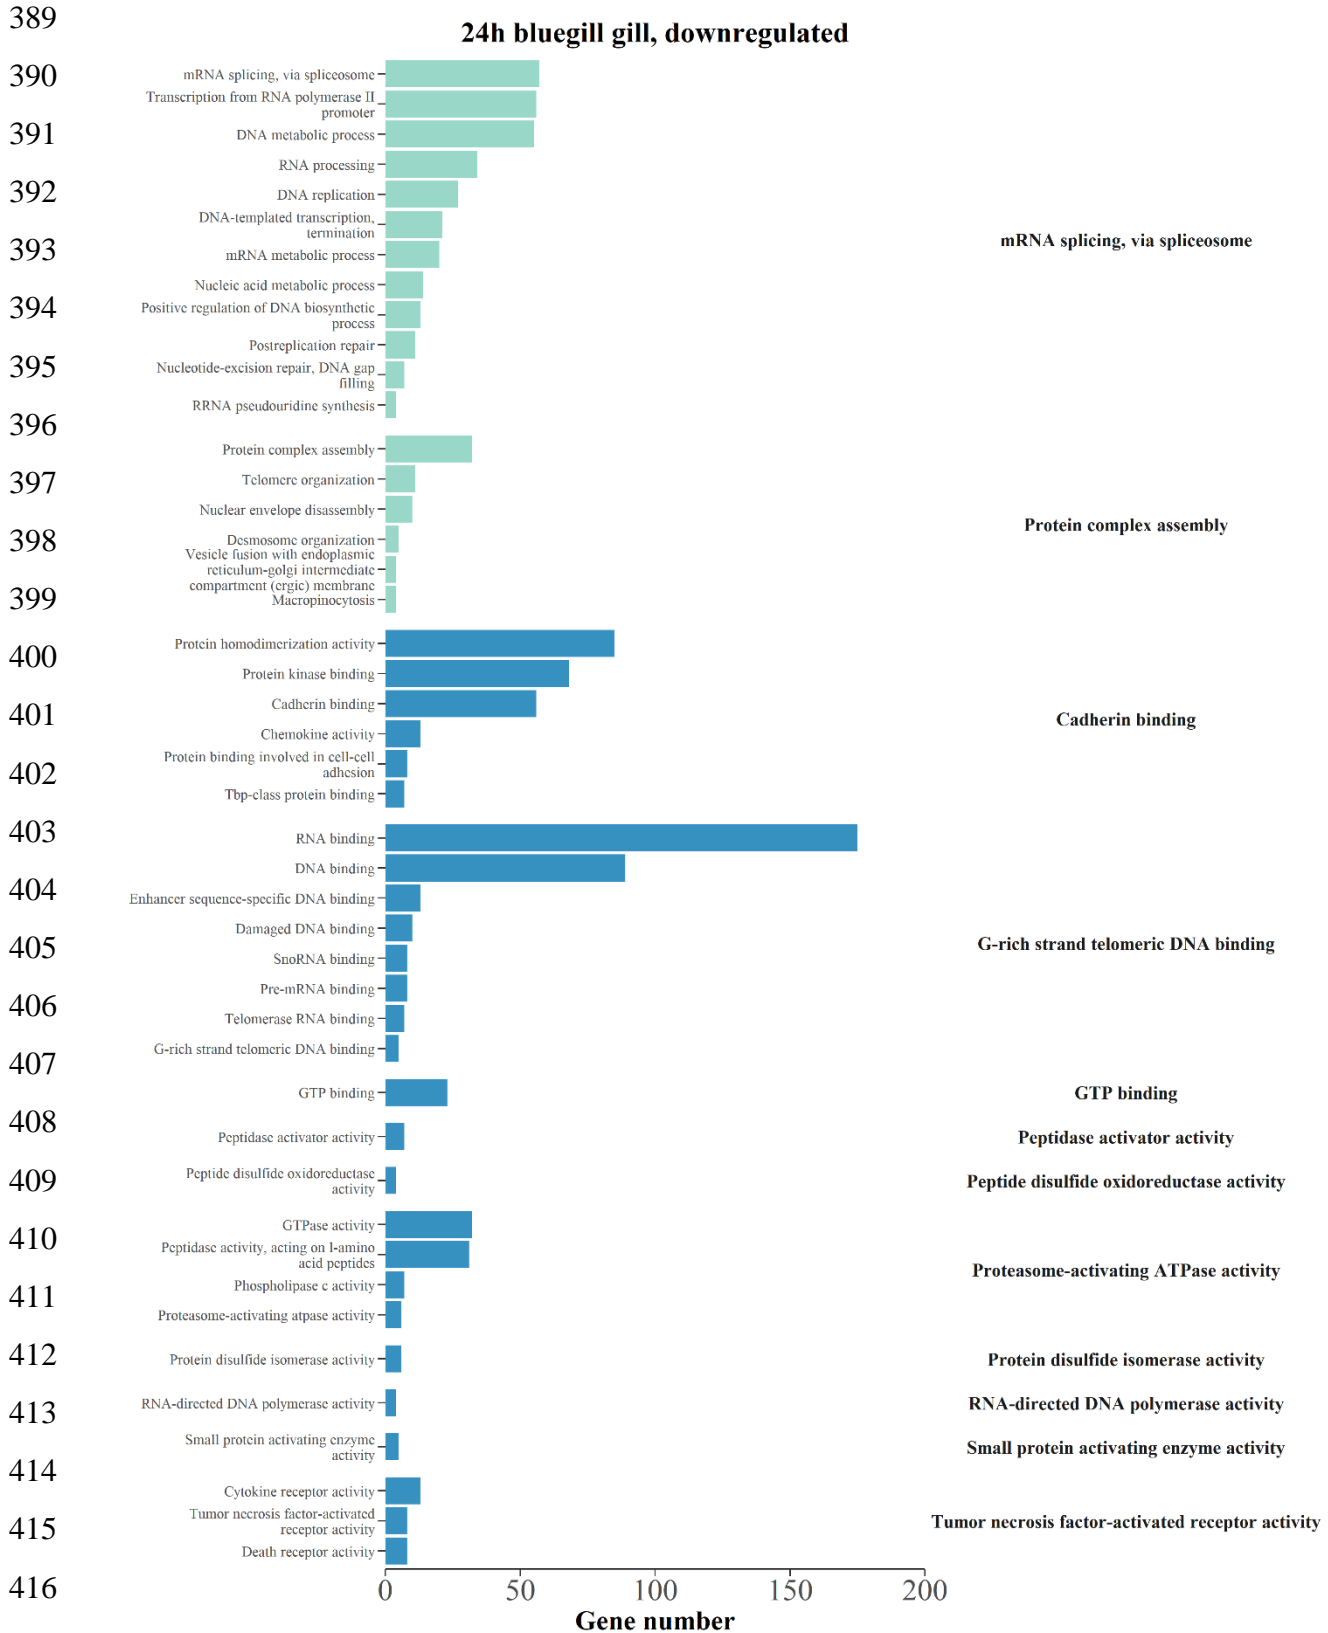

419 **Figure S12:** Summary of enriched gene ontology (GO) terms associated with biological  
420 processes (green) and molecular functions (blue) in transcripts that were downregulated  
421 following 24 h of TFM (3-trifluoromethyl-4'-nitrophenol; 22.06 mg L<sup>-1</sup> nominal) exposure in the  
422 gills of bluegill (*Lepomis macrochirus*). Transcripts were considered differentially regulated at a  
423 false discovery rate < 0.05. Only GO terms from the functional analysis with an adjusted p <  
424 0.05 and at least four transcripts were considered significantly enriched. REVIGO was used to  
425 summarize GO terms to reduce redundancy and group according to similarity (right labels).

426

427

428

429

430

431

432

433

434

435

436

437

438

439

440

441

442

443

444

445

446

447

448

449

450

451  
452  
453  
454  
455  
456  
457  
458  
459  
460  
461  
462  
463  
464  
465  
466  
467  
468  
469  
470  
471  
472  
473  
474  
475  
476  
477  
478  
479  
480  
481  
482

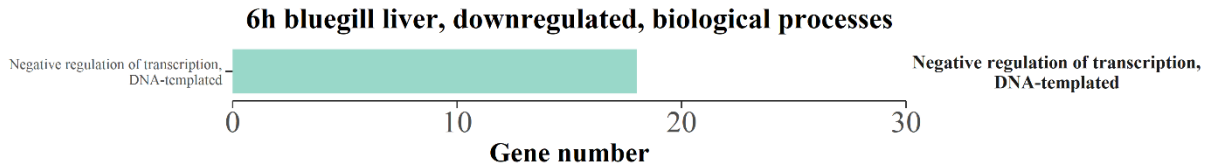

**Figure S13:** Summary of enriched gene ontology (GO) terms associated with biological processes in transcripts that were downregulated following 6 h of TFM (3-trifluoromethyl-4'-nitrophenol; 22.06 mg L<sup>-1</sup> nominal) exposure in the liver of bluegill (*Lepomis macrochirus*). Transcripts were considered differentially regulated at a false discovery rate < 0.05. Only GO terms from the functional analysis with an adjusted p < 0.05 and at least four transcripts were considered significantly enriched. REVIGO was used to summarize GO terms to reduce redundancy and group according to similarity (right labels).

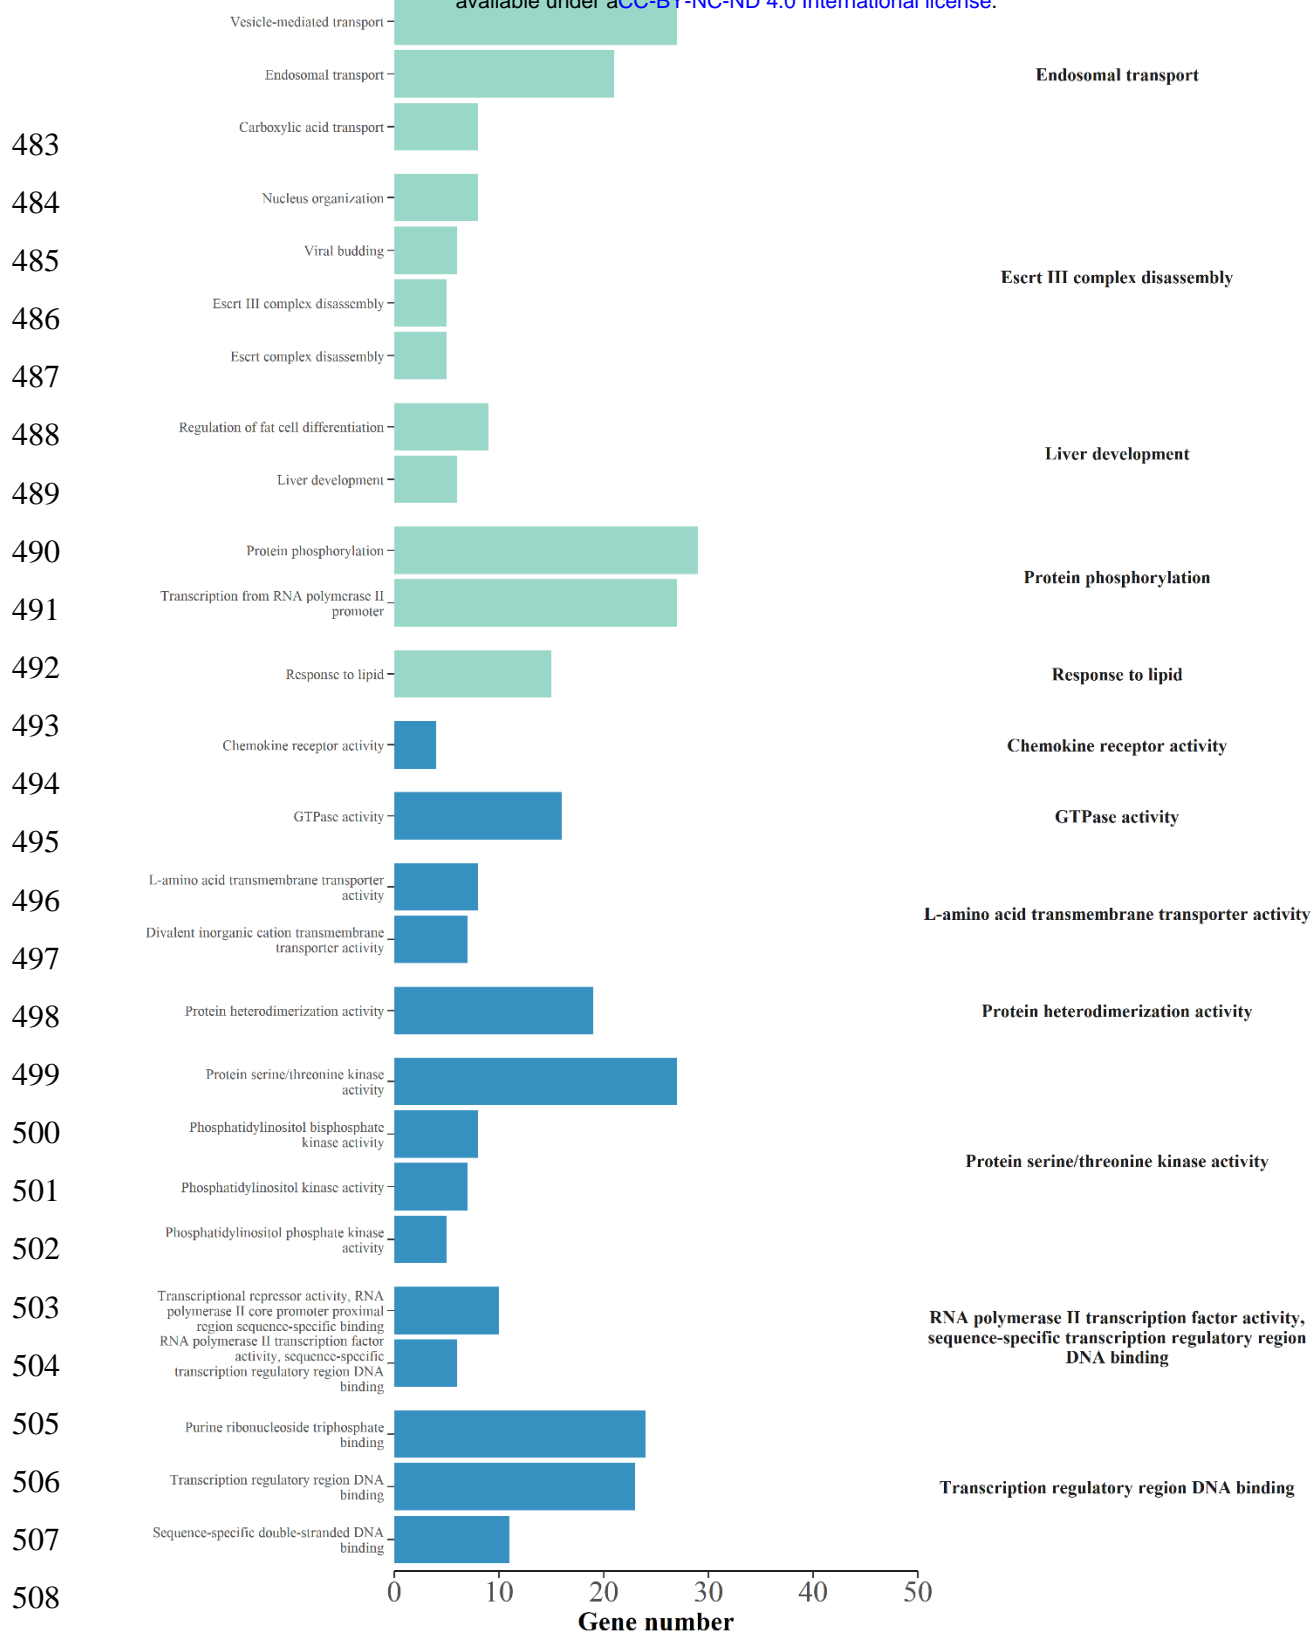

**Figure S14:** Summary of enriched gene ontology (GO) terms associated with biological processes (green) and molecular functions (blue) in transcripts that were upregulated following 12 h of TFM (3-trifluoromethyl-4'-nitrophenol; 22.06 mg L<sup>-1</sup> nominal) exposure in the liver of bluegill (*Lepomis macrochirus*). Transcripts were considered differentially regulated at a false



514 discovery rate < 0.05. Only GO terms from the functional analysis with an adjusted  $p < 0.05$  and  
515 at least four transcripts were considered significantly enriched. REVIGO was used to summarize  
516 GO terms to reduce redundancy and group according to similarity (right labels).

517

518

519

520

521

522

523

524

525

526

527

528

529

530

531

532

533

534

535

536

537

538

539

540

541

542

543

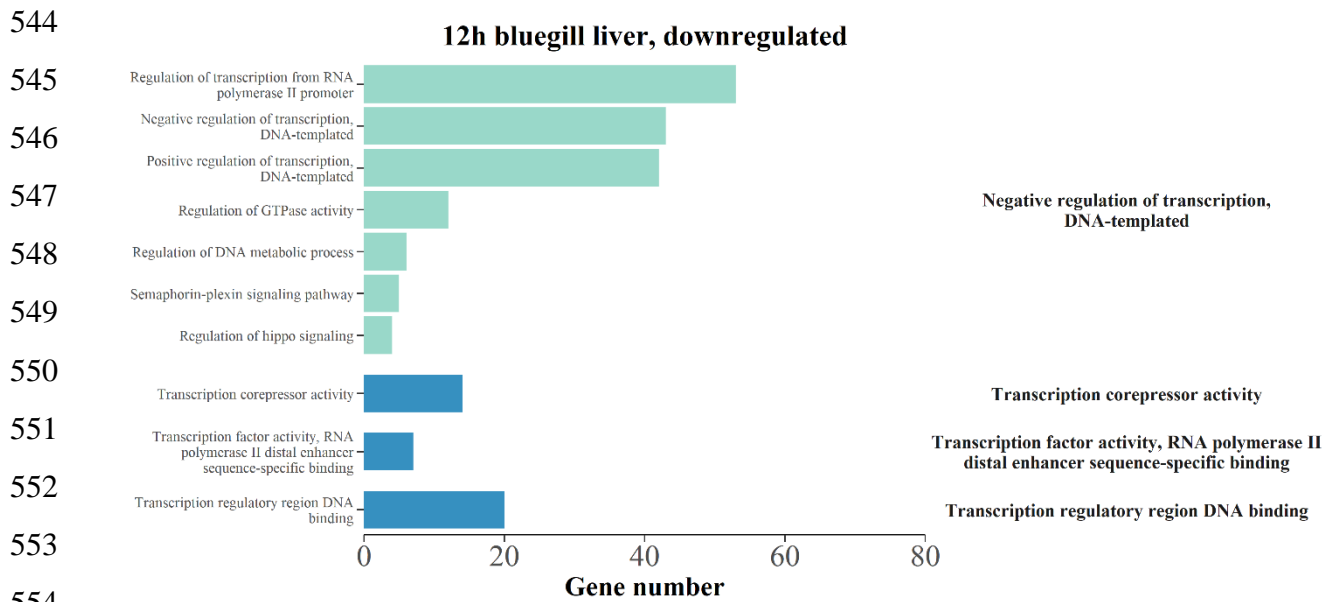

555 **Figure S15:** Summary of enriched gene ontology (GO) terms associated with biological  
556 processes (green) and molecular functions (blue) in transcripts that were downregulated  
557 following 12 h of TFM (3-trifluoromethyl-4'-nitrophenol; 22.06 mg L<sup>-1</sup> nominal) exposure in the  
558 liver of bluegill (*Lepomis macrochirus*). Transcripts were considered differentially regulated at a  
559 false discovery rate < 0.05. Only GO terms from the functional analysis with an adjusted p <  
560 0.05 and at least four transcripts were considered significantly enriched. REVIGO was used to  
561 summarize GO terms to reduce redundancy and group according to similarity (right labels).

562

563

564

565

566

567

568

569

570

571

572

573

574

575

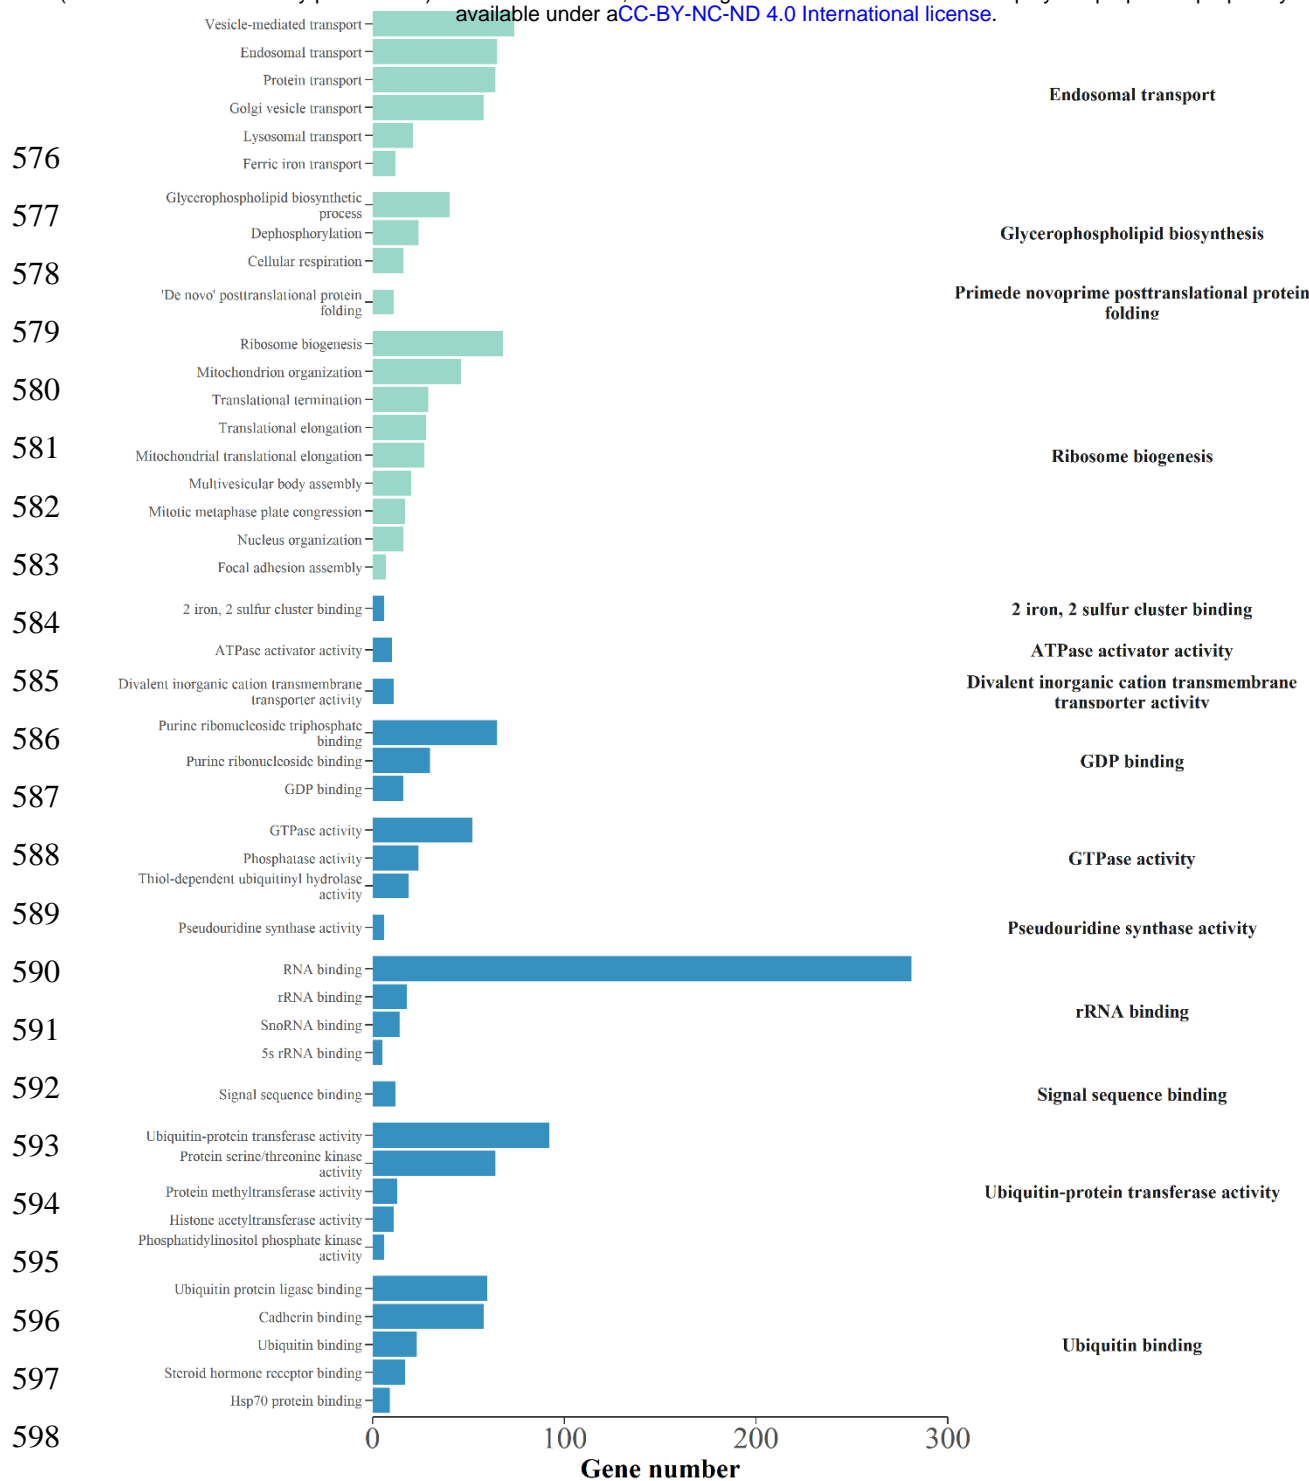

599  
 600 **Figure S16:** Summary of enriched gene ontology (GO) terms associated with biological  
 601 processes (green) and molecular functions (blue) in transcripts that were upregulated following  
 602 24 h of TFM (3-trifluoromethyl-4'-nitrophenol; 22.06 mg L<sup>-1</sup> nominal) exposure in the liver of  
 603 bluegill (*Lepomis macrochirus*). Transcripts were considered differentially regulated at a false  
 604 discovery rate < 0.05. Only GO terms from the functional analysis with an adjusted p < 0.05 and  
 605 at least four transcripts were considered significantly enriched. REVIGO was used to summarize  
 606 GO terms to reduce redundancy and group according to similarity (right labels).

607

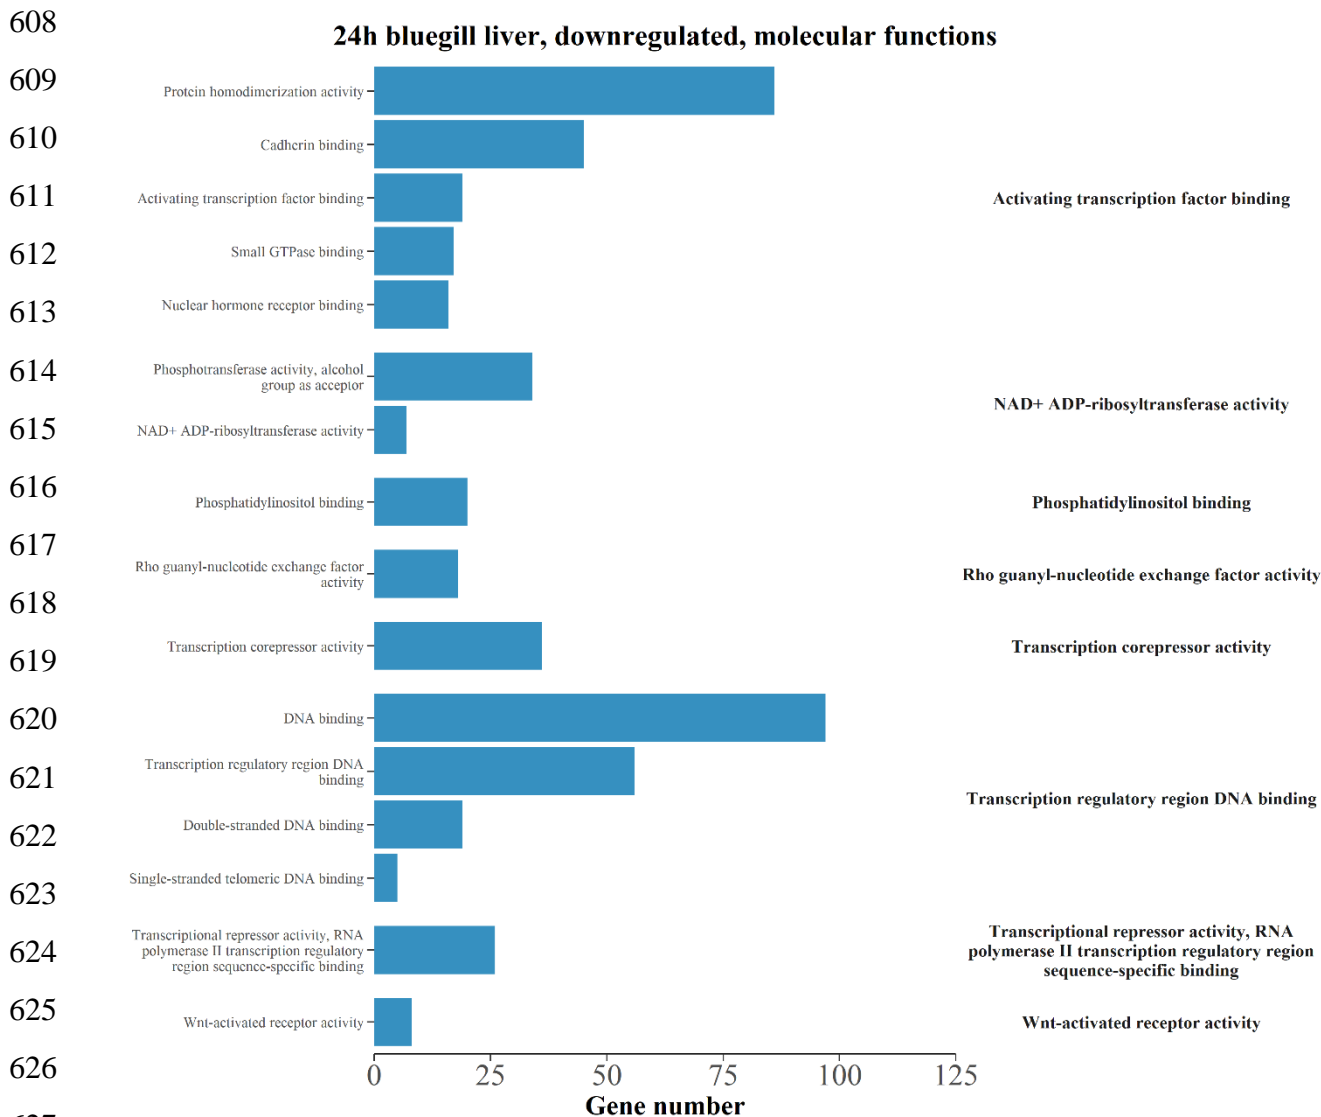

629 **Figure S17:** Summary of enriched gene ontology (GO) terms associated with molecular  
 630 functions in transcripts that were downregulated following 24 h of TFM (3-trifluoromethyl-4'-  
 631 nitrophenol; 22.06 mg L<sup>-1</sup> nominal) exposure in the liver of bluegill (*Lepomis macrochirus*).  
 632 Transcripts were considered differentially regulated at a false discovery rate < 0.05. Only GO  
 633 terms from the functional analysis with an adjusted p < 0.05 and at least four transcripts were  
 634 considered significantly enriched. REVIGO was used to summarize GO terms to reduce  
 635 redundancy and group according to similarity (right labels).

636  
 637  
 638  
 639
